# Supplementary material for: Topological Characterization of Human and Mouse m5C Epitranscriptome Revealed by Bisulfite Sequencing
Source: Hindawi journal article supplement (doi:10.1155/2018/1351964), 2018-06-13
Supplement: f1 [file 1351964.f1.pdf]

Supporting Information – **Tables and Figures**  
**Topological characterization of m<sup>5</sup>C epitranscriptome in human  
and mouse**

**Table S1.** RNA m<sup>5</sup>C methylation is enriched on 5'UTR of mRNA.

| Region       | Species | Cell   | OR          | p-value     | Enriched |
|--------------|---------|--------|-------------|-------------|----------|
| <b>5'UTR</b> | Human   | MCF10A | 3.138452587 | 3.42E-04    | Yes      |
|              |         | MDA468 | 4.801521457 | 1.87E-82    | Yes      |
|              | Mouse   | Brain  | 1.600523029 | 4.68E-09    | Yes      |
|              |         | ESC    | 2.744182653 | 0           | Yes      |
| <b>CDS</b>   | Human   | MCF10A | 0.737478238 | 6.39E-09    | Yes      |
|              |         | MDA469 | 0.607316233 | 0.999993833 | No       |
|              | Mouse   | Brain  | 0.921190561 | 1           | No       |
|              |         | ESC    | 0.923214737 | 0           | Yes      |
| <b>3'UTR</b> | Human   | MCF10A | 0.963777736 | 1           | No       |
|              |         | MDA470 | 0.971245244 | 1           | No       |
|              | Mouse   | Brain  | 1.013596292 | 1.19E-02    | Yes      |
|              |         | ESC    | 0.616944645 | 1           | No       |

Table shows the enrichment odds ratio of transcriptome m<sup>5</sup>C at different regions of mRNA. The p-values are calculated from Fisher's exact test. m<sup>5</sup>C is consistently enriched at 5'UTRs on mRNA.

**Table S2.** Correlated methylation status at the conserved locus in human and mouse

| Region | Cell         | p-values | Conserved | OR       | 95%CI lower | 95%CI upper |
|--------|--------------|----------|-----------|----------|-------------|-------------|
| 5'UTR  | Brain:MCF10A | 5.08E-09 | Yes       | 5.518488 | 3.276153    | 8.829768357 |
|        | Brain:MDA468 | 1.23E-06 | Yes       | 5.045639 | 2.72693     | 8.699535575 |
|        | ESC:MCF10A   | 0.111851 | Marginal  | 1.544756 | 0.864908    | 2.575701499 |
|        | ESC:MDA46    | 0.071708 | Marginal  | 1.7308   | 0.920304    | 3.010289159 |
| 3'UTR  | Brain:MCF10A | 0.589205 | No        | 1.13382  | 0.028268    | 6.546466183 |
|        | Brain:MDA468 | 0.23312  | No        | 3.929861 | 0.094844    | 24.53885881 |
|        | ESC:MCF10A   | 0.428824 | No        | 1.806182 | 0.045014    | 10.43730286 |
|        | ESC:MDA46    | 1        | No        | 0        | 0           | 19.86828857 |
| CDS    | Brain:MCF10A | 0.242101 | No        | 1.509041 | 0.60286     | 3.137921831 |
|        | Brain:MDA468 | 0.504139 | No        | 1.306364 | 0.26698     | 3.876797368 |
|        | ESC:MCF10A   | 0.127449 | Marginal  | 1.552574 | 0.842335    | 2.630804016 |
|        | ESC:MDA46    | 1        | No        | 0.838203 | 0.171255    | 2.48859736  |

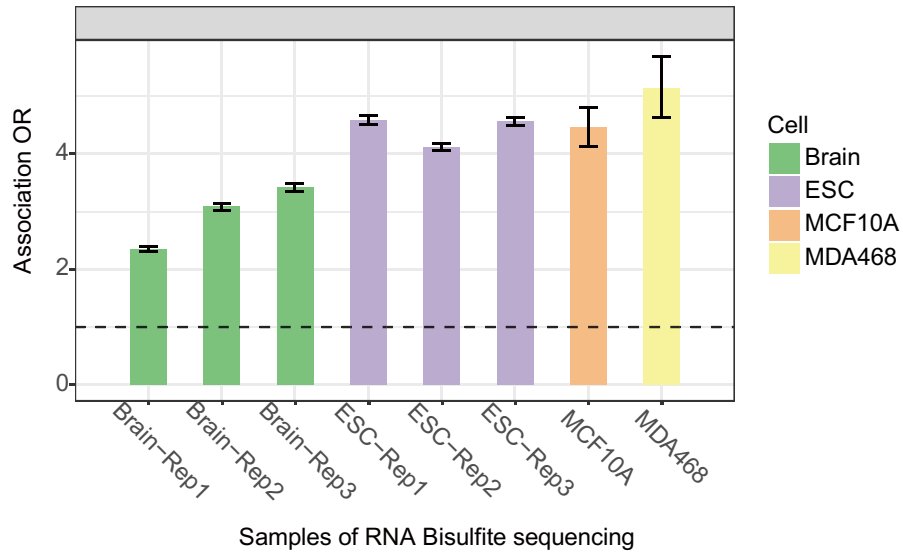

**Figure S1. Association between reported methylated sites and double stranded RNA structures before filtering.** The reported m<sup>5</sup>C sites by MeRanTK approach are clearly enriched with double stranded RNA structure before the filtering, and the pattern is consistent in all the 4 samples. The odds ratio (OR) was calculated from Fisher's exact test and the error bar shows the 95% confidence interval of OR estimation.

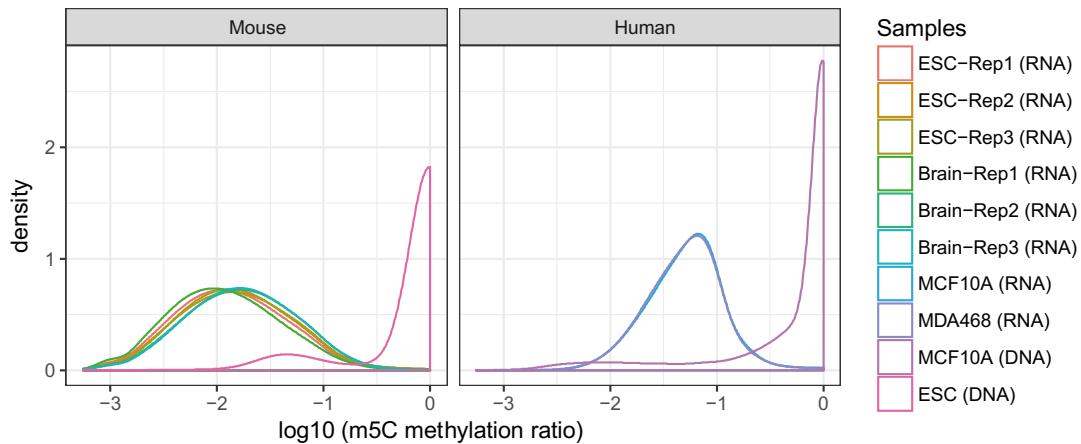

**Figure S2. Distribution of RNA and DNA methylation ratio.** The diagram shows the distribution of RNA and DNA methylation ratio under 4 different conditions. In general, DNA methylation ratio is much higher than RNA. The distribution patterns of biological replicates are relatively close.

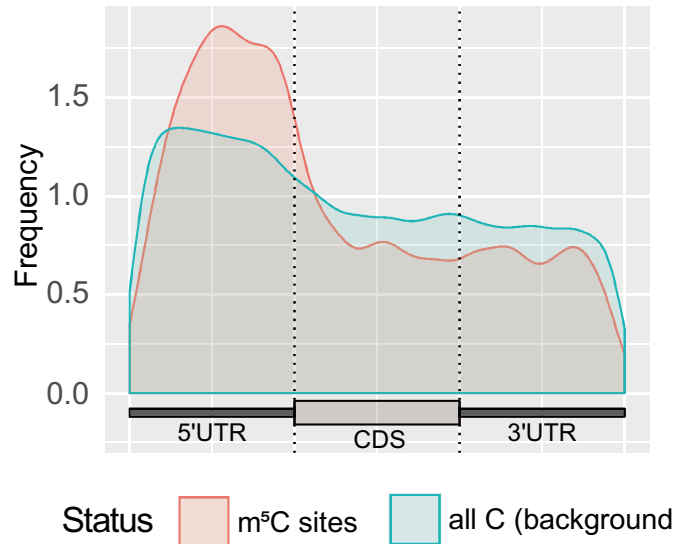

**Figure S3. mRNA m<sup>5</sup>C sites are enriched at 5'UTRs in HeLa cells.** The 10275 RNA methylation sites from Hela cell line are extracted from a previous study (1). Compared with the background (all the transcriptomic Cytosine sites), the reported mRNA m<sup>5</sup>C methylation sites are more enriched on 5'UTR. Prominent enrichment is not observed on 3'UTR. This trend is consistent with the other 4 samples tested (See **Figure 1** of the main text). Figure is plotted using default setting of Guitar package (2) with human hg19 genome assembly and UCSC gene annotation.

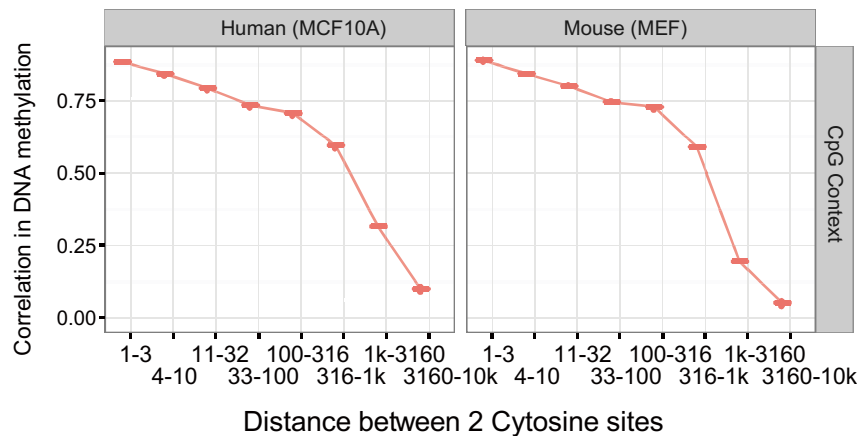

**Figure S4. Strong clustering effect exists in DNA methylation under CpG context.** Figure shows the correlation in methylation level between two cytosine sites of a certain distance. Strong correlation is observed between cytosine sites with a smaller distance.

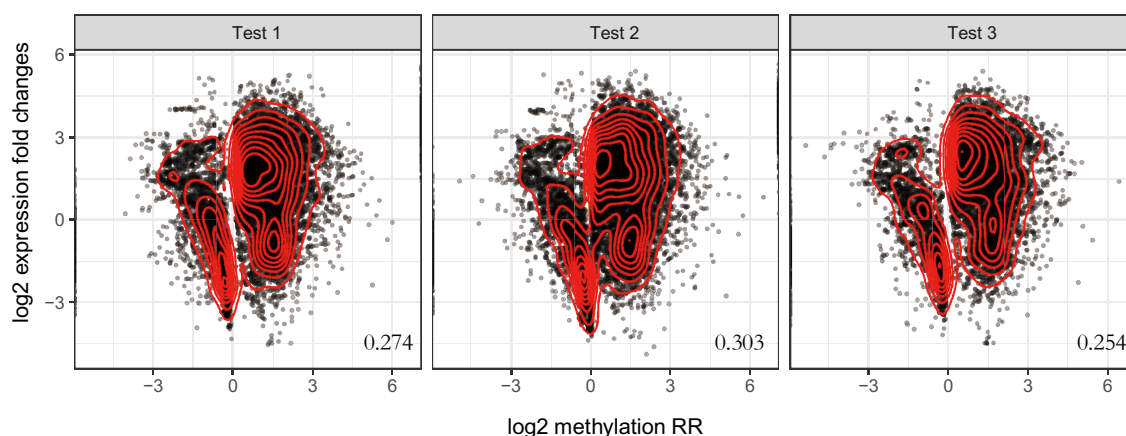

**Figure S5. Positive correlations are observed between expression and mRNA m<sup>5</sup>C methylation fold change.** To eliminate the interference of dependent noise between expression and methylation data, the samples are further divided for different purposes, and the test was repeated for 3 times using different ways of sample grouping. A strong, consistent and significant positive correlation is observed (0.274, 0.303 and 0.254) between log2 expression fold change and log2 methylation fold change when comparing mouse embryo stem cells with brain cells, suggesting that increased methylation level is likely to be associated with increased expression level, but the underlying mechanism is not yet clear.

## REFERENCE

1. Squires, J.E., Patel, H.R., Nousch, M., Sibbritt, T., Humphreys, D.T., Parker, B.J., Suter, C.M. and Preiss, T. (2012) Widespread occurrence of 5-methylcytosine in human coding and non-coding RNA. *Nucleic acids research*, gks144.
2. Cui, X., Wei, Z., Zhang, L., Liu, H., Sun, L., Zhang, S.-W., Huang, Y. and Meng, J. (2016) Guitar: An R/Bioconductor Package for Gene Annotation Guided Transcriptomic Analysis of RNA-Related Genomic Features. *BioMed Research International*, **2016**, 8.

## SI\_Sheets\_S1

### DM\_MDA468-MCF10A

| seqname<br>s | start         | end           | strand | log2.RR | pvalue     | DESeq2<br>log2FC | Gene<br>Symbol |
|--------------|---------------|---------------|--------|---------|------------|------------------|----------------|
| chrM         | 295           | 295           | +      | 1.0030  | 0.00021644 | 1.6228           | NA             |
| chrM         | 12619         | 12619         | -      | 2.0785  | 0.03297760 | 0.7119           | NA             |
| chrM         | 12184         | 12184         | -      | 1.8780  | 0.02598220 | (0.1410)         | NA             |
| chrM         | 12295         | 12295         | -      | 1.4099  | 0.00347779 | 0.8877           | NA             |
| chrM         | 12319         | 12319         | -      | 1.5821  | 0.00245258 | 0.8297           | NA             |
| chrM         | 12284         | 12284         | -      | 1.9939  | 0.00258367 | 0.6871           | NA             |
| chrM         | 12301         | 12301         | -      | 2.2546  | 0.02914261 | 0.7097           | NA             |
| chrM         | 12316         | 12316         | -      | 0.9299  | 0.00974915 | 0.8860           | NA             |
| chrM         | 12245         | 12245         | -      | 1.1695  | 0.01486688 | 0.7419           | NA             |
| chrM         | 12294         | 12294         | -      | 1.8254  | 0.00159248 | 0.8893           | NA             |
| chrM         | 15864         | 15864         | -      | 1.0747  | 0.02298167 | 0.8844           | NA             |
| chrM         | 12317         | 12317         | -      | 1.4446  | 0.00325778 | 0.9271           | NA             |
| chrM         | 12187         | 12187         | -      | 1.4089  | 0.01371059 | 0.1939           | NA             |
| chrM         | 12186         | 12186         | -      | 1.8400  | 0.01610350 | 0.0140           | NA             |
| chr1         | 26799100      | 26799100      | +      | 1.4239  | 0.01943261 | 0.0877           | HMGN2          |
| chr1         | 26799094      | 26799094      | +      | 2.0048  | 0.01596889 | (0.0000)         | HMGN2          |
| chr1         | 26799096      | 26799096      | +      | 1.8338  | 0.01575193 | (0.0578)         | HMGN2          |
| chr1         | 26799097      | 26799097      | +      | 1.7815  | 0.02051692 | (0.0011)         | HMGN2          |
| chr1         | 26799088      | 26799088      | +      | 1.9933  | 0.02780126 | (0.3456)         | HMGN2          |
| chr1         | 26799099      | 26799099      | +      | 1.8962  | 0.00813283 | 0.0735           | HMGN2          |
| chr1         | 26799093      | 26799093      | +      | 2.5782  | 0.00551700 | 0.0056           | HMGN2          |
| chr1         | 26799087      | 26799087      | +      | 2.5816  | 0.01079698 | (0.2384)         | HMGN2          |
| chr1         | 26799091      | 26799091      | +      | 3.6798  | 0.00115739 | (0.1009)         | HMGN2          |
| chr1         | 41327425      | 41327425      | -      | Inf     | 0.02967750 | 2.6847           | CITED4         |
| chr1         | 20960562<br>1 | 20960562<br>1 | +      | 2.0357  | 0.01925418 | 0.8645           | MIR205HG       |
| chr1         | 20960561<br>9 | 20960561<br>9 | +      | 1.6277  | 0.00486650 | 0.8642           | MIR205HG       |
| chr1         | 20960562<br>5 | 20960562<br>5 | +      | 1.5275  | 0.02324784 | 0.7733           | MIR205HG       |
| chr1         | 20960562<br>2 | 20960562<br>2 | +      | 1.7787  | 0.00647039 | 0.8622           | MIR205HG       |
| chr1         | 20960562<br>8 | 20960562<br>8 | +      | 1.4557  | 0.01833902 | 0.8883           | MIR205HG       |
| chr1         | 20960562<br>7 | 20960562<br>7 | +      | 1.5386  | 0.02570147 | 0.9033           | MIR205HG       |

|       |               |               |   |         |            |          |          |
|-------|---------------|---------------|---|---------|------------|----------|----------|
| chr1  | 20960562<br>4 | 20960562<br>4 | + | 1.6281  | 0.00833441 | 0.8096   | MIR205HG |
| chr6  | 30460963      | 30460963      | + | 1.1467  | 0.00887000 | 1.6978   | NA       |
| chr6  | 30460961      | 30460961      | + | 0.9504  | 0.00638062 | 1.6988   | NA       |
| chr7  | 75932209      | 75932209      | + | 1.2701  | 0.02567389 | 0.9649   | HSPB1    |
| chr8  | 14601728<br>4 | 14601728<br>4 | - | 2.4353  | 0.00042198 | 0.2769   | RPL8     |
| chr8  | 14601728<br>5 | 14601728<br>5 | - | 1.9399  | 0.00283365 | 0.2093   | RPL8     |
| chr8  | 14601728<br>3 | 14601728<br>3 | - | 2.2246  | 0.00044037 | 0.2361   | RPL8     |
| chr11 | 810019        | 810019        | + | 1.3051  | 0.03459002 | (0.0088) | RPLP2    |
| chr11 | 810021        | 810021        | + | 1.2345  | 0.03449497 | (0.0409) | RPLP2    |
| chr11 | 810036        | 810036        | + | 1.8146  | 0.02202777 | (0.2267) | RPLP2    |
| chr11 | 810024        | 810024        | + | 1.3823  | 0.03451201 | (0.0391) | RPLP2    |
| chr11 | 810018        | 810018        | + | 1.0798  | 0.02963545 | 0.1430   | RPLP2    |
| chr11 | 61734952      | 61734952      | - | 0.2656  | 0.02352192 | (1.4369) | FTH1     |
| chr11 | 61734956      | 61734956      | - | 0.1421  | 0.01781051 | (1.3754) | FTH1     |
| chr11 | 61734942      | 61734942      | - | 0.3599  | 0.04166230 | (1.3864) | FTH1     |
| chr11 | 61734950      | 61734950      | - | 0.3592  | 0.04067754 | (1.3468) | FTH1     |
| chr11 | 61734934      | 61734934      | - | 0.1952  | 0.02964588 | (1.3401) | FTH1     |
| chr11 | 61734955      | 61734955      | - | 0.1607  | 0.04216580 | (1.2916) | FTH1     |
| chr11 | 67817223      | 67817223      | + | Inf     | 0.00304444 | 2.4040   | TCIRG1   |
| chr11 | 67817217      | 67817217      | + | Inf     | 0.01060542 | 2.4852   | TCIRG1   |
| chr11 | 67817220      | 67817220      | + | Inf     | 0.00340341 | 2.4742   | TCIRG1   |
| chr11 | 67817222      | 67817222      | + | Inf     | 0.00151361 | 2.4477   | TCIRG1   |
| chr11 | 67817219      | 67817219      | + | Inf     | 0.00252046 | 2.4648   | TCIRG1   |
| chr11 | 67817216      | 67817216      | + | Inf     | 0.00531521 | 2.4813   | TCIRG1   |
| chr11 | 67817226      | 67817226      | + | Inf     | 0.00412166 | 2.6548   | TCIRG1   |
| chr11 | 67817225      | 67817225      | + | Inf     | 0.00803745 | 2.6429   | TCIRG1   |
| chr15 | 90328300      | 90328300      | - | 0.0000  | 0.03501987 | (2.1380) | ANPEP    |
| chr16 | 84651628      | 84651628      | - | 3.6959  | 0.04488490 | (0.6192) | COTL1    |
| chr16 | 84651630      | 84651630      | - | 3.8882  | 0.04794005 | (0.5390) | COTL1    |
| chr17 | 39777000      | 39777000      | - | 1.4036  | 0.00602756 | 1.8991   | JUP      |
| chr17 | 39776999      | 39776999      | - | 0.1194  | 0.00125961 | 1.8810   | JUP      |
| chr19 | 1038682       | 1038682       | + | Inf     | 0.00130553 | 1.1744   | CNN2     |
| chr19 | 1038671       | 1038671       | + | Inf     | 0.00255257 | 1.1832   | CNN2     |
| chr19 | 1038683       | 1038683       | + | Inf     | 0.00107319 | 1.1419   | CNN2     |
| chr19 | 1038675       | 1038675       | + | Inf     | 0.00078584 | 1.1795   | CNN2     |
| chr19 | 1038680       | 1038680       | + | Inf     | 0.00012044 | 1.2601   | CNN2     |
| chrM  | 7328          | 7328          | + | -0.5239 | 0.03899141 | (0.8133) | NA       |

|      |               |               |   |            |            |          |        |
|------|---------------|---------------|---|------------|------------|----------|--------|
| chrM | 7334          | 7334          | + | -0.4835    | 0.03142980 | (0.9712) | NA     |
| chrM | 2758          | 2758          | + | -1.7976    | 0.03150925 | 1.0289   | NA     |
| chrM | 8037          | 8037          | + | -2.0197    | 0.03178848 | 1.0142   | NA     |
| chrM | 8031          | 8031          | + | -2.3579    | 0.02782147 | 1.0737   | NA     |
| chrM | 8053          | 8053          | + | -1.8220    | 0.03651928 | 1.0127   | NA     |
| chrM | 2901          | 2901          | + | -1.6228    | 0.04641736 | 0.9079   | NA     |
| chrM | 8077          | 8077          | + | -1.7851    | 0.00836431 | 0.9757   | NA     |
| chrM | 8055          | 8055          | + | -1.7949    | 0.01178239 | 0.9499   | NA     |
| chrM | 2893          | 2893          | + | -1.6993    | 0.01503339 | 0.8373   | NA     |
| chrM | 8071          | 8071          | + | -2.0395    | 0.01378801 | 0.9892   | NA     |
| chrM | 7337          | 7337          | + | -0.6521    | 0.01831668 | (0.9948) | NA     |
| chrM | 8050          | 8050          | + | -1.7501    | 0.02547098 | 0.9921   | NA     |
| chrM | 2902          | 2902          | + | -1.6033    | 0.04540561 | 0.9036   | NA     |
| chrM | 8713          | 8713          | + | -0.4310    | 0.03364071 | (0.7562) | NA     |
| chrM | 8069          | 8069          | + | -1.5873    | 0.02794642 | 0.9814   | NA     |
| chrM | 1867          | 1867          | + | -2.2656    | 0.01008787 | 1.0920   | NA     |
| chrM | 2886          | 2886          | + | -1.5686    | 0.02798062 | 0.9125   | NA     |
| chrM | 8081          | 8081          | + | -1.6973    | 0.03497701 | 1.0435   | NA     |
| chr1 | 24019135      | 24019135      | + | -0.6336    | 0.04431446 | (0.6873) | RPL11  |
| chr1 | 24019143      | 24019143      | + | -2.5534    | 0.02659312 | (0.6581) | RPL11  |
| chr1 | 15350729<br>3 | 15350729<br>3 | - | -2.2861    | 0.03650156 | (1.0049) | S100A6 |
| chr1 | 15350726<br>2 | 15350726<br>2 | - | -1.2043    | 0.01664121 | (0.8083) | S100A6 |
| chr1 | 15350727<br>9 | 15350727<br>9 | - | -0.4264    | 0.04878029 | (0.9040) | S100A6 |
| chr1 | 15493890<br>4 | 15493890<br>4 | - | #NAME<br>? | 0.00404141 | (2.7105) | SHC1   |
| chr2 | 55277254      | 55277254      | - | -0.8720    | 0.02395047 | (2.1441) | RTN4   |
| chr2 | 55277255      | 55277255      | - | #NAME<br>? | 0.00847862 | (2.1652) | RTN4   |
| chr2 | 55277257      | 55277257      | - | #NAME<br>? | 0.01109803 | (2.1725) | RTN4   |
| chr2 | 55277258      | 55277258      | - | #NAME<br>? | 0.00514037 | (2.3979) | RTN4   |
| chr2 | 85133611      | 85133611      | + | -1.7567    | 0.01941391 | (0.4185) | TMSB10 |
| chr2 | 21628545<br>4 | 21628545<br>4 | - | #NAME<br>? | 0.00558349 | (3.2027) | FN1    |
| chr2 | 21629663<br>4 | 21629663<br>4 | - | #NAME<br>? | 0.00805242 | (3.1697) | FN1    |
| chr2 | 21629663<br>1 | 21629663<br>1 | - | #NAME<br>? | 0.02911234 | (3.1804) | FN1    |
| chr2 | 21623030<br>0 | 21623030<br>0 | - | #NAME<br>? | 0.04084190 | (3.1554) | FN1    |



|       |               |               |   |            |            |          |                 |
|-------|---------------|---------------|---|------------|------------|----------|-----------------|
| chr2  | 21629808<br>4 | 21629808<br>4 | - | #NAME<br>? | 0.00122074 | (3.2056) | FN1             |
| chr5  | 40834349      | 40834349      | - | -2.3682    | 0.01881507 | 0.4874   | RPL37           |
| chr5  | 40834331      | 40834331      | - | -2.8418    | 0.01310316 | 0.4326   | RPL37           |
| chr5  | 40834330      | 40834330      | - | -2.7713    | 0.02737153 | 0.4417   | RPL37           |
| chr5  | 40834333      | 40834333      | - | -3.7792    | 0.01219405 | 0.4569   | RPL37           |
| chr5  | 14982652<br>1 | 14982652<br>1 | - | -2.3989    | 0.00546336 | (0.9093) | RPS14           |
| chr5  | 17923364<br>9 | 17923364<br>9 | - | -0.5850    | 0.02623801 | (1.5785) | MGAT4B          |
| chr6  | 34205006      | 34205006      | + | -0.4095    | 0.00015531 | (1.2290) | HMGA1           |
| chr6  | 34208627      | 34208627      | + | -0.7228    | 0.03561993 | (0.5363) | HMGA1           |
| chr7  | 5567650       | 5567650       | - | -1.5636    | 0.04506241 | (0.1273) | ACTB            |
| chr7  | 54823535      | 54823535      | - | -2.0155    | 0.04003392 | 1.8753   | SEC61G          |
| chr7  | 54823516      | 54823516      | - | -3.0968    | 0.01066809 | 2.1061   | SEC61G          |
| chr7  | 54823513      | 54823513      | - | -3.3635    | 0.04719659 | 2.3872   | SEC61G          |
| chr7  | 75932358      | 75932358      | + | -3.5500    | 0.01010825 | 0.3860   | HSPB1           |
| chr7  | 75932377      | 75932377      | + | -3.4814    | 0.01524517 | 0.5227   | HSPB1           |
| chr7  | 75932362      | 75932362      | + | #NAME<br>? | 0.00233464 | 0.3831   | HSPB1           |
| chr8  | 10173369<br>8 | 10173369<br>8 | - | -0.8627    | 0.00914372 | (0.8529) | PABPC1          |
| chr9  | 13621689<br>2 | 13621689<br>2 | + | -0.9317    | 0.04338719 | (0.5014) | RPL7A           |
| chr11 | 61732229      | 61732229      | - | -1.4551    | 0.04339167 | 0.3602   | FTH1            |
| chr11 | 61732227      | 61732227      | - | -1.4292    | 0.01030176 | 0.2948   | FTH1            |
| chr11 | 61732251      | 61732251      | - | -1.4121    | 0.03341563 | 0.3936   | FTH1            |
| chr11 | 61732226      | 61732226      | - | -2.2436    | 0.00222210 | 0.3210   | FTH1            |
| chr11 | 61732225      | 61732225      | - | -1.7529    | 0.00756333 | 0.3171   | FTH1            |
| chr11 | 62334441      | 62334441      | - | -1.3334    | 0.04355345 | (0.1346) | EEF1G           |
| chr11 | 62334462      | 62334462      | - | -2.1679    | 0.01252382 | (0.0936) | EEF1G           |
| chr11 | 65306695      | 65306695      | - | -0.4079    | 0.02790451 | (0.7102) | LTBP3           |
| chr11 | 75111844      | 75111844      | + | -1.0508    | 0.03727205 | (0.4757) | RPS3            |
| chr12 | 6875851       | 6875851       | + | -0.3907    | 0.04185005 | (0.4587) | PTMS            |
| chr12 | 6875852       | 6875852       | + | -0.5039    | 0.03241342 | (0.4785) | PTMS            |
| chr12 | 57106952      | 57106952      | - | -1.4124    | 0.02594472 | (0.6397) | NACA            |
| chr15 | 90328288      | 90328288      | - | #NAME<br>? | 0.01311644 | (2.5430) | ANPEP           |
| chr17 | 16342696      | 16342696      | + | -2.1307    | 0.00123664 | (1.1996) | LRRC75A-<br>AS1 |
| chr17 | 48165718      | 48165718      | + | -0.1473    | 0.03337030 | (2.3145) | ITGA3           |
| chr17 | 48165719      | 48165719      | + | -0.1612    | 0.04054757 | (2.2730) | ITGA3           |
| chr17 | 49244197      | 49244197      | + | -1.3810    | 0.00917170 | (1.5091) | NME2            |

|       |          |          |   |         |            |          |         |
|-------|----------|----------|---|---------|------------|----------|---------|
| chr17 | 48165717 | 48165717 | + | -0.1227 | 0.03620798 | (2.2924) | ITGA3   |
| chr17 | 79478518 | 79478518 | - | -0.9225 | 0.00035980 | (1.1371) | ACTG1   |
| chr17 | 80195269 | 80195269 | + | -0.8251 | 0.03573892 | (1.8833) | SLC16A3 |
| chr19 | 1104123  | 1104123  | + | -1.1825 | 0.02551551 | (0.9110) | GPX4    |
| chr19 | 1104122  | 1104122  | + | -1.1157 | 0.02048137 | (0.9778) | GPX4    |
| chr19 | 5690535  | 5690535  | + | -1.4388 | 0.04328661 | (0.2994) | RPL36   |
| chr19 | 5690542  | 5690542  | + | -2.3001 | 0.00497960 | (0.3524) | RPL36   |
| chr19 | 3982286  | 3982286  | - | -0.0128 | 0.04992637 | (1.0997) | EEF2    |
| chr19 | 3976641  | 3976641  | - | -2.1916 | 0.00507570 | (0.9773) | EEF2    |
| chr19 | 3982257  | 3982257  | - | -0.6941 | 0.01267919 | (1.1621) | EEF2    |
| chr19 | 3981348  | 3981348  | - | -1.0455 | 0.04284370 | (0.4495) | EEF2    |
| chr19 | 15168759 | 15168759 | + | -1.2251 | 0.04404534 | 0.4982   | CASP14  |
| chr19 | 15168767 | 15168767 | + | -1.6333 | 0.04524949 | 0.4495   | CASP14  |
| chr19 | 15168755 | 15168755 | + | -1.2251 | 0.04404534 | 0.4982   | CASP14  |
| chr19 | 15168757 | 15168757 | + | -1.0396 | 0.02268098 | 0.2584   | CASP14  |
| chr20 | 57466760 | 57466760 | + | -0.6752 | 0.03928924 | (0.6982) | GNAS    |
| chr20 | 57466739 | 57466739 | + | -0.3475 | 0.03545187 | (0.8345) | GNAS    |
| chr20 | 57466745 | 57466745 | + | -0.3115 | 0.03844303 | (0.6976) | GNAS    |
| chr20 | 57466761 | 57466761 | + | -0.3399 | 0.03308692 | (0.7029) | GNAS    |
| chr20 | 57466738 | 57466738 | + | -0.3835 | 0.01472380 | (0.7992) | GNAS    |
| chr20 | 57466742 | 57466742 | + | -0.2135 | 0.02755269 | (0.8188) | GNAS    |
| chr20 | 57466744 | 57466744 | + | -0.1567 | 0.04963075 | (0.7186) | GNAS    |
| chr20 | 57466571 | 57466571 | + | -1.9346 | 0.03503080 | (1.1705) | GNAS    |
| chr20 | 57466741 | 57466741 | + | -0.2061 | 0.03297448 | (0.7953) | GNAS    |
| chr22 | 36678098 | 36678098 | - | -1.6762 | 0.03065017 | (1.4254) | MYH9    |
| chr22 | 39713589 | 39713589 | - | -0.1994 | 0.01348909 | (1.7282) | RPL3    |
| chrX  | 12994904 | 12994904 | + | -1.0723 | 0.04403199 | (0.0343) | TMSB4X  |

## GO - DM\_MDA468-MCF10A

| Category        | Term                                | PValue   | Fold Enrichment | FDR      |
|-----------------|-------------------------------------|----------|-----------------|----------|
| SP_PIR_KEYWORDS | acetylation                         | 2.16E-14 | 4.866540164     | 2.62E-11 |
| GOTERM_BP_FAT   | GO:0006414~translational elongation | 3.16E-13 | 35.0796794      | 4.64E-10 |
| SP_PIR_KEYWORDS | ribosome                            | 2.51E-12 | 56.462818       | 3.03E-09 |
| SP_PIR_KEYWORDS | protein biosynthesis                | 5.39E-12 | 26.79647923     | 6.52E-09 |
| GOTERM_CC_FAT   | GO:0005829~cytosol                  | 1.95E-11 | 5.285789474     | 2.36E-08 |
| GOTERM_CC_FAT   | GO:0022626~cytosolic                | 9.58E-11 | 35.50555556     | 1.16E-07 |

|                 |                                                                 |             |             |             |
|-----------------|-----------------------------------------------------------------|-------------|-------------|-------------|
|                 | ribosome                                                        |             |             |             |
| GOTERM_CC_FAT   | GO:0022625~cytosolic large ribosomal subunit                    | 1.39E-09    | 58.86447368 | 1.67E-06    |
| GOTERM_BP_FAT   | GO:0006412~translation                                          | 2.62E-09    | 11.67716875 | 3.85E-06    |
| GOTERM_CC_FAT   | GO:0033279~ribosomal subunit                                    | 3.85E-09    | 22.46835938 | 4.65E-06    |
| SP_PIR_KEYWORDS | ribosomal protein                                               | 5.20E-09    | 21.9243921  | 6.29E-06    |
| GOTERM_CC_FAT   | GO:0044445~cytosolic part                                       | 1.50E-08    | 18.92072368 | 1.81E-05    |
| GOTERM_MF_FAT   | GO:0003735~structural constituent of ribosome                   | 2.91E-08    | 17.38794643 | 3.45E-05    |
| GOTERM_CC_FAT   | GO:0015934~large ribosomal subunit                              | 4.70E-08    | 33.3858209  | 5.68E-05    |
| KEGG_PATHWAY    | hsa03010:Ribosome                                               | 9.20E-08    | 18.70344828 | 8.56E-05    |
| SP_PIR_KEYWORDS | ribonucleoprotein                                               | 1.12E-07    | 14.7734255  | 1.35E-04    |
| GOTERM_MF_FAT   | GO:0005198~structural molecule activity                         | 1.92E-07    | 6.655323344 | 2.28E-04    |
| GOTERM_CC_FAT   | GO:0005840~ribosome                                             | 2.21E-07    | 13.37651163 | 2.67E-04    |
| GOTERM_CC_FAT   | GO:0030529~ribonucleoprotein complex                            | 2.45E-07    | 7.445825243 | 2.96E-04    |
| SP_PIR_KEYWORDS | cytoplasm                                                       | 3.58E-06    | 2.886404562 | 0.004331813 |
| SP_PIR_KEYWORDS | phosphoprotein                                                  | 4.33E-06    | 1.954737974 | 0.005239862 |
| GOTERM_CC_FAT   | GO:0043232~intracellular non-membrane-bounded organelle         | 1.64E-05    | 2.584957627 | 0.019804179 |
| GOTERM_CC_FAT   | GO:0043228~non-membrane-bounded organelle                       | 1.64E-05    | 2.584957627 | 0.019804179 |
| GOTERM_CC_FAT   | GO:0005625~soluble fraction                                     | 3.87E-05    | 8.167412141 | 0.046741671 |
| GOTERM_CC_FAT   | GO:0001726~ruffle                                               | 4.94E-05    | 23.84701493 | 0.059628979 |
| KEGG_PATHWAY    | hsa05110:Vibrio cholerae infection                              | 1.19E-04    | 18.16071429 | 0.110714732 |
| SP_PIR_KEYWORDS | rna-binding                                                     | 5.91E-04    | 80.81932773 | 0.71176962  |
| GOTERM_CC_FAT   | GO:0031252~cell leading edge                                    | 7.98E-04    | 11.57789855 | 0.959342333 |
| SP_PIR_KEYWORDS | blocked amino end                                               | 9.90E-04    | 19.91200828 | 1.189626736 |
| GOTERM_MF_FAT   | GO:0003723~RNA binding                                          | 0.001122335 | 4.068488858 | 1.321108896 |
| GOTERM_CC_FAT   | GO:0000267~cell fraction                                        | 0.001192774 | 3.245660203 | 1.430785214 |
| SP_PIR_KEYWORDS | actin-binding                                                   | 0.001850709 | 9.270773087 | 2.214277078 |
| SP_PIR_KEYWORDS | cytoskeleton                                                    | 0.002140865 | 5.040618449 | 2.557325732 |
| KEGG_PATHWAY    | hsa04810:Regulation of actin cytoskeleton                       | 0.002836553 | 5.67627907  | 2.608809198 |
| GOTERM_MF_FAT   | GO:0019843~rRNA binding                                         | 0.00339162  | 33.57672414 | 3.943612386 |
| GOTERM_MF_FAT   | GO:0008092~cytoskeletal protein binding                         | 0.003643177 | 4.507986111 | 4.230359791 |
| SP_PIR_KEYWORDS | cell motility                                                   | 0.004258629 | 457.9761905 | 5.027905801 |
| GOTERM_BP_FAT   | GO:0030036~actin cytoskeleton organization                      | 0.00473306  | 7.126000843 | 6.741410077 |
| KEGG_PATHWAY    | hsa05412:Arrhythmogenic right ventricular cardiomyopathy (ARVC) | 0.00518194  | 10.70526316 | 4.719824528 |

|                 |                                                           |             |             |             |
|-----------------|-----------------------------------------------------------|-------------|-------------|-------------|
| SP_PIR_KEYWORDS | disease mutation                                          | 0.0054868   | 2.878542995 | 6.434229397 |
| GOTERM_BP_FAT   | GO:0030029~actin filament-based process                   | 0.005934037 | 6.682473819 | 8.383289119 |
| SP_PIR_KEYWORDS | microfilament                                             | 0.006381304 | 305.3174603 | 7.446435928 |
| KEGG_PATHWAY    | hsa05414:Dilated cardiomyopathy                           | 0.008810366 | 8.843478261 | 7.905265722 |
| SMART           | SM00152:THY                                               | 0.009329317 | 201.7555556 | 7.073111491 |
| GOTERM_CC_FAT   | GO:0030863~cortical cytoskeleton                          | 0.009745974 | 19.56428571 | 11.15338045 |
| INTERPRO        | IPR016323:Thymosin beta-4, chordata                       | 0.012246701 | 158.6571429 | 13.28094981 |
| INTERPRO        | IPR001152:Thymosin beta-4                                 | 0.012246701 | 158.6571429 | 13.28094981 |
| KEGG_PATHWAY    | hsa04510:Focal adhesion                                   | 0.013521888 | 5.059701493 | 11.89958629 |
| SP_PIR_KEYWORDS | methylation                                               | 0.014749801 | 7.569854388 | 16.44119635 |
| GOTERM_BP_FAT   | GO:0051235~maintenance of location                        | 0.016046823 | 15.09821429 | 21.17828456 |
| GOTERM_MF_FAT   | GO:0003779~actin binding                                  | 0.016079713 | 4.978144172 | 17.46746686 |
| GOTERM_MF_FAT   | GO:0019900~kinase binding                                 | 0.016372653 | 7.253072626 | 17.75800223 |
| GOTERM_MF_FAT   | GO:0003729~mRNA binding                                   | 0.016710831 | 14.75340909 | 18.09224101 |
| GOTERM_CC_FAT   | GO:0042995~cell projection                                | 0.01802548  | 3.209253945 | 19.71930997 |
| GOTERM_BP_FAT   | GO:0042989~sequestering of actin monomers                 | 0.018050591 | 107.3650794 | 23.50697606 |
| SP_PIR_KEYWORDS | structural protein                                        | 0.01902495  | 101.7724868 | 20.7199901  |
| SP_PIR_KEYWORDS | deafness                                                  | 0.019234604 | 13.73928571 | 20.92455843 |
| GOTERM_MF_FAT   | GO:0019899~enzyme binding                                 | 0.019352252 | 3.723613767 | 20.66040818 |
| PIR_SUPERFAMILY | PIRSF001828:Thymosin_beta                                 | 0.020787901 | 92.45       | 17.08609608 |
| GOTERM_CC_FAT   | GO:0005856~cytoskeleton                                   | 0.020789735 | 2.313902969 | 22.4059737  |
| GOTERM_CC_FAT   | GO:0044448~cell cortex part                               | 0.02642977  | 11.55       | 27.63369946 |
| UP_SEQ_FEATURE  | mutagenesis site                                          | 0.02681487  | 2.225288159 | 29.12099805 |
| SP_PIR_KEYWORDS | rna-binding                                               | 0.027415737 | 4.240520282 | 28.53922567 |
| SP_PIR_KEYWORDS | isopeptide bond                                           | 0.030290944 | 5.742648156 | 31.05139574 |
| GOTERM_BP_FAT   | GO:0032989~cellular component morphogenesis               | 0.031491021 | 4.056615089 | 37.54476344 |
| GOTERM_BP_FAT   | GO:0000904~cell morphogenesis involved in differentiation | 0.037373511 | 5.280249805 | 42.89876679 |
| INTERPRO        | IPR004001:Actin, conserved site                           | 0.038676631 | 49.58035714 | 36.62748615 |
| GOTERM_MF_FAT   | GO:0042802~identical protein binding                      | 0.041327067 | 3.042890625 | 39.33675015 |
| SP_PIR_KEYWORDS | methylated amino acid                                     | 0.041798543 | 45.79761905 | 40.31638304 |
| GOTERM_BP_FAT   | GO:0007010~cytoskeleton organization                      | 0.042181889 | 3.69375273  | 46.95405007 |
| KEGG_PATHWAY    | hsa05416:Viral myocarditis                                | 0.043534925 | 8.594366197 | 33.91435317 |
| SP_PIR_KEYWORDS | elongation factor                                         | 0.043843105 | 43.61678005 | 41.83767464 |

|                 |                                                                                     |             |             |             |
|-----------------|-------------------------------------------------------------------------------------|-------------|-------------|-------------|
| GOTERM_BP_FAT   | GO:0008104~protein localization                                                     | 0.04819929  | 2.556311413 | 51.65099446 |
| SP_PIR_KEYWORDS | cell shape                                                                          | 0.049951288 | 38.16468254 | 46.17325266 |
| GOTERM_BP_FAT   | GO:0042254~ribosome biogenesis                                                      | 0.052649245 | 7.920374707 | 54.87188906 |
| GOTERM_BP_FAT   | GO:0006928~cell motion                                                              | 0.054714401 | 3.39047619  | 56.29768312 |
| GOTERM_BP_FAT   | GO:0022604~regulation of cell morphogenesis                                         | 0.059720388 | 7.376226827 | 59.58149474 |
| KEGG_PATHWAY    | hsa05410:Hypertrophic cardiomyopathy (HCM)                                          | 0.060105763 | 7.178823529 | 43.8339952  |
| UP_SEQ_FEATURE  | cross-link:Glycyl lysine isopeptide (Lys-Gly) (interchain with G-Cter in ubiquitin) | 0.067884997 | 6.860373295 | 58.94290704 |
| GOTERM_BP_FAT   | GO:0051129~negative regulation of cellular component organization                   | 0.068780349 | 6.804828974 | 64.94729355 |
| PIR_SUPERFAMILY | PIRSF002337:Actin                                                                   | 0.06898696  | 27.19117647 | 47.14236066 |
| GOTERM_MF_FAT   | GO:0003746~translation elongation factor activity                                   | 0.069717436 | 27.04791667 | 57.50771785 |
| SMART           | SM00268:ACTIN                                                                       | 0.070629369 | 25.86609687 | 43.63158861 |
| GOTERM_MF_FAT   | GO:0019901~protein kinase binding                                                   | 0.071880881 | 6.623979592 | 58.66337694 |
| GOTERM_CC_FAT   | GO:0005938~cell cortex                                                              | 0.072979252 | 6.56609589  | 59.949391   |
| GOTERM_BP_FAT   | GO:0001525~angiogenesis                                                             | 0.073903048 | 6.528957529 | 67.67947456 |
| GOTERM_BP_FAT   | GO:0030837~negative regulation of actin filament polymerization                     | 0.08155655  | 23.00680272 | 71.39387942 |
| GOTERM_BP_FAT   | GO:0031032~actomyosin structure organization                                        | 0.08155655  | 23.00680272 | 71.39387942 |
| GOTERM_MF_FAT   | GO:0045182~translation regulator activity                                           | 0.083633955 | 22.38448276 | 64.45423338 |
| GOTERM_BP_FAT   | GO:0032272~negative regulation of protein polymerization                            | 0.084345897 | 22.2134647  | 72.64568081 |
| GOTERM_CC_FAT   | GO:0008305~integrin complex                                                         | 0.084894964 | 22.03793103 | 65.74166102 |
| SP_PIR_KEYWORDS | non-syndromic deafness                                                              | 0.085808861 | 21.80839002 | 66.1915019  |
| GOTERM_CC_FAT   | GO:0012505~endomembrane system                                                      | 0.087403991 | 2.451790281 | 66.85878277 |
| INTERPRO        | IPR004000:Actin/actin-like                                                          | 0.091728897 | 20.34065934 | 67.13003658 |
| GOTERM_BP_FAT   | GO:0000902~cell morphogenesis                                                       | 0.092638573 | 3.619047619 | 76.07233965 |
| SP_PIR_KEYWORDS | sulfation                                                                           | 0.093596037 | 19.91200828 | 69.51280952 |
| GOTERM_BP_FAT   | GO:0042981~regulation of apoptosis                                                  | 0.093985082 | 2.403695807 | 76.58942514 |
| GOTERM_BP_FAT   | GO:0043067~regulation of programmed cell death                                      | 0.097056035 | 2.380014075 | 77.73002267 |
| GOTERM_BP_FAT   | GO:0031333~negative regulation of protein complex assembly                          | 0.098169127 | 18.94677871 | 78.13049236 |

|               |                                     |             |             |            |
|---------------|-------------------------------------|-------------|-------------|------------|
| GOTERM_BP_FAT | GO:0010941~regulation of cell death | 0.098221097 | 2.371253287 | 78.1490253 |
|---------------|-------------------------------------|-------------|-------------|------------|

## SI\_Sheets\_S2

### GO - hyper in ESC

| Category         | Term                                          | PValue   | Fold Enrichment | FDR      |
|------------------|-----------------------------------------------|----------|-----------------|----------|
| SP_PIR_KEYWORD S | acetylation                                   | 1.76E-45 | 2.6017          | 2.42E-42 |
| SP_PIR_KEYWORD S | phosphoprotein                                | 9.17E-43 | 1.7228          | 1.27E-39 |
| SP_PIR_KEYWORD S | cytoplasm                                     | 2.94E-17 | 1.7595          | 4.05E-14 |
| GOTERM_CC_FAT    | GO:0030529~ribonucleoprotein complex          | 4.24E-17 | 3.5172          | 5.95E-14 |
| SP_PIR_KEYWORD S | nucleus                                       | 1.36E-15 | 1.6165          | 1.84E-12 |
| GOTERM_CC_FAT    | GO:0043233~organelle lumen                    | 8.82E-15 | 2.3032          | 1.23E-11 |
| GOTERM_CC_FAT    | GO:0070013~intracellular organelle lumen      | 2.08E-14 | 2.2850          | 2.93E-11 |
| GOTERM_CC_FAT    | GO:0031974~membrane-enclosed lumen            | 2.48E-14 | 2.2521          | 3.49E-11 |
| SP_PIR_KEYWORD S | rna-binding                                   | 7.53E-13 | 3.0219          | 1.04E-09 |
| SP_PIR_KEYWORD S | ribonucleoprotein                             | 1.22E-12 | 3.9070          | 1.68E-09 |
| GOTERM_MF_FAT    | GO:0003723~RNA binding                        | 8.88E-12 | 2.5301          | 1.31E-08 |
| GOTERM_BP_FAT    | GO:0006412~translation                        | 1.50E-11 | 3.3691          | 2.60E-08 |
| SP_PIR_KEYWORD S | protein biosynthesis                          | 6.16E-11 | 4.9845          | 8.51E-08 |
| GOTERM_CC_FAT    | GO:0031981~nuclear lumen                      | 2.96E-10 | 2.2146          | 4.16E-07 |
| GOTERM_BP_FAT    | GO:0016071~mRNA metabolic process             | 2.21E-09 | 3.1351          | 3.83E-06 |
| GOTERM_BP_FAT    | GO:0006396~RNA processing                     | 2.44E-09 | 2.6936          | 4.23E-06 |
| SP_PIR_KEYWORD S | ribosomal protein                             | 2.49E-09 | 4.0649          | 3.43E-06 |
| GOTERM_MF_FAT    | GO:0003735~structural constituent of ribosome | 2.67E-09 | 4.3307          | 3.95E-06 |
| GOTERM_CC_FAT    | GO:0005840~ribosome                           | 6.29E-09 | 3.8731          | 8.83E-06 |
| KEGG_PATHWAY     | mmu03010:Ribosome                             | 6.33E-09 | 5.0765          | 7.51E-06 |
| GOTERM_BP_FAT    | GO:0006397~mRNA processing                    | 9.75E-09 | 3.2231          | 1.69E-05 |
| GOTERM_MF_FAT    | GO:0000166~nucleotide binding                 | 2.55E-08 | 1.5817          | 3.77E-05 |
| GOTERM_CC_FAT    | GO:0043228~non-membrane-bounded organelle     | 4.33E-08 | 1.6361          | 6.08E-05 |

|                  |                                                         |          |         |          |
|------------------|---------------------------------------------------------|----------|---------|----------|
| GOTERM_CC_FAT    | GO:0043232~intracellular non-membrane-bounded organelle | 4.33E-08 | 1.6361  | 6.08E-05 |
| GOTERM_CC_FAT    | GO:0005739~mitochondrion                                | 7.96E-08 | 1.7917  | 1.12E-04 |
| SP_PIR_KEYWORD S | mrna processing                                         | 1.04E-07 | 3.2199  | 1.44E-04 |
| SP_PIR_KEYWORD S | methylation                                             | 2.52E-07 | 3.2556  | 3.48E-04 |
| SP_PIR_KEYWORD S | transcription regulation                                | 5.07E-07 | 1.6719  | 7.00E-04 |
| SP_PIR_KEYWORD S | repressor                                               | 6.81E-07 | 2.5217  | 9.41E-04 |
| GOTERM_CC_FAT    | GO:0031967~organelle envelope                           | 9.62E-07 | 2.2442  | 1.35E-03 |
| GOTERM_BP_FAT    | GO:0008380~RNA splicing                                 | 1.06E-06 | 3.1828  | 1.84E-03 |
| GOTERM_CC_FAT    | GO:0019866~organelle inner membrane                     | 1.06E-06 | 2.7365  | 1.49E-03 |
| GOTERM_CC_FAT    | GO:0031975~envelope                                     | 1.08E-06 | 2.2359  | 1.52E-03 |
| GOTERM_CC_FAT    | GO:0044429~mitochondrial part                           | 1.11E-06 | 2.2601  | 1.56E-03 |
| SP_PIR_KEYWORD S | ribosome                                                | 1.11E-06 | 10.4274 | 1.53E-03 |
| GOTERM_CC_FAT    | GO:0005681~spliceosome                                  | 2.29E-06 | 3.9980  | 3.22E-03 |
| SP_PIR_KEYWORD S | mrna splicing                                           | 2.98E-06 | 3.2089  | 4.12E-03 |
| GOTERM_MF_FAT    | GO:0008134~transcription factor binding                 | 5.46E-06 | 2.6339  | 8.08E-03 |
| GOTERM_CC_FAT    | GO:0005654~nucleoplasm                                  | 6.12E-06 | 2.0691  | 8.59E-03 |
| GOTERM_CC_FAT    | GO:0031090~organelle membrane                           | 8.66E-06 | 1.8724  | 1.22E-02 |
| INTERPRO         | IPR012677:Nucleotide-binding, alpha-beta plait          | 1.10E-05 | 2.9646  | 1.77E-02 |
| SP_PIR_KEYWORD S | mitochondrion                                           | 1.49E-05 | 1.8552  | 2.06E-02 |
| SP_PIR_KEYWORD S | nucleotide-binding                                      | 1.54E-05 | 1.5521  | 2.13E-02 |
| GOTERM_MF_FAT    | GO:0005198~structural molecule activity                 | 2.22E-05 | 2.1507  | 3.28E-02 |

## GO - hypo in ESC

| Category        | Term                                                      | PValue    | Fold Enrichment | FDR       |
|-----------------|-----------------------------------------------------------|-----------|-----------------|-----------|
| SP_PIR_KEYWORDS | acetylation                                               | 1.17E-194 | 2.7579          | 1.69E-191 |
| SP_PIR_KEYWORDS | phosphoprotein                                            | 2.08E-97  | 1.5810          | 3.01E-94  |
| SP_PIR_KEYWORDS | ribonucleoprotein                                         | 4.43E-64  | 4.5198          | 6.42E-61  |
| GOTERM_CC_FAT   | GO:0030529~ribonucleoprotein complex                      | 4.00E-57  | 3.2816          | 5.87E-54  |
| SP_PIR_KEYWORDS | cytoplasm                                                 | 1.59E-56  | 1.7497          | 2.31E-53  |
| GOTERM_MF_FAT   | GO:0003735~structural constituent of ribosome             | 2.96E-55  | 5.3845          | 4.78E-52  |
| GOTERM_BP_FAT   | GO:0006412~translation                                    | 4.05E-55  | 3.8094          | 7.37E-52  |
| SP_PIR_KEYWORDS | ribosomal protein                                         | 9.99E-51  | 4.8980          | 1.45E-47  |
| GOTERM_CC_FAT   | GO:0005840~ribosome                                       | 2.22E-47  | 4.4366          | 3.25E-44  |
| KEGG_PATHWAY    | mmu03010:Ribosome                                         | 5.12E-47  | 5.3904          | 6.29E-44  |
| GOTERM_CC_FAT   | GO:0005739~mitochondrion                                  | 3.70E-43  | 2.0276          | 5.43E-40  |
| GOTERM_BP_FAT   | GO:0006091~generation of precursor metabolites and energy | 6.34E-41  | 3.6582          | 1.15E-37  |
| SP_PIR_KEYWORDS | mitochondrion                                             | 4.38E-38  | 2.3708          | 6.35E-35  |
| GOTERM_CC_FAT   | GO:0044429~mitochondrial part                             | 2.56E-37  | 2.6547          | 3.76E-34  |
| GOTERM_CC_FAT   | GO:0031090~organelle membrane                             | 3.75E-33  | 2.1928          | 5.51E-30  |
| GOTERM_CC_FAT   | GO:0031966~mitochondrial membrane                         | 2.93E-30  | 2.8032          | 4.31E-27  |
| KEGG_PATHWAY    | mmu00190:Oxidative phosphorylation                        | 2.45E-29  | 3.7389          | 3.01E-26  |
| SP_PIR_KEYWORDS | protein biosynthesis                                      | 4.63E-29  | 4.2364          | 6.71E-26  |
| GOTERM_CC_FAT   | GO:0005740~mitochondrial envelope                         | 4.89E-29  | 2.6983          | 7.17E-26  |
| GOTERM_CC_FAT   | GO:0019866~organelle inner membrane                       | 8.03E-29  | 2.9306          | 1.18E-25  |
| SP_PIR_KEYWORDS | mitochondrion inner membrane                              | 2.85E-28  | 3.7094          | 4.13E-25  |
| GOTERM_CC_FAT   | GO:0005743~mitochondrial inner membrane                   | 5.43E-28  | 2.9570          | 7.98E-25  |
| GOTERM_CC_FAT   | GO:0031967~organelle envelope                             | 5.79E-28  | 2.3734          | 8.50E-25  |
| GOTERM_CC_FAT   | GO:0031975~envelope                                       | 9.18E-28  | 2.3647          | 1.35E-24  |
| GOTERM_BP_FAT   | GO:0046907~intracellular transport                        | 8.65E-26  | 2.5082          | 1.57E-22  |
| KEGG_PATHWAY    | mmu05016:Huntington's disease                             | 1.63E-25  | 3.0700          | 2.00E-22  |
| GOTERM_MF_FAT   | GO:0000166~nucleotide binding                             | 9.70E-25  | 1.5555          | 1.57E-21  |
| GOTERM_CC_FAT   | GO:0005829~cytosol                                        | 1.14E-24  | 2.2634          | 1.67E-21  |
| GOTERM_CC_FAT   | GO:0033279~ribosomal subunit                              | 2.87E-24  | 5.3284          | 4.22E-21  |
| SP_PIR_KEYWORDS | respiratory chain                                         | 3.34E-23  | 5.5404          | 4.84E-20  |
| SP_PIR_KEYWORDS | rna-binding                                               | 3.75E-23  | 2.3608          | 5.44E-20  |



|                 |                                                         |          |        |          |
|-----------------|---------------------------------------------------------|----------|--------|----------|
| GOTERM_MF_FAT   | GO:0003723~RNA binding                                  | 7.88E-23 | 2.0877 | 1.27E-19 |
| SP_PIR_KEYWORDS | transit peptide                                         | 2.24E-22 | 2.3802 | 3.24E-19 |
| KEGG_PATHWAY    | mmu05012:Parkinson's disease                            | 8.26E-22 | 3.2749 | 1.02E-18 |
| GOTERM_CC_FAT   | GO:0070469~respiratory chain                            | 2.45E-21 | 5.0497 | 3.59E-18 |
| GOTERM_CC_FAT   | GO:0031974~membrane-enclosed lumen                      | 2.57E-21 | 1.7374 | 3.77E-18 |
| GOTERM_CC_FAT   | GO:0043233~organelle lumen                              | 4.41E-21 | 1.7474 | 6.47E-18 |
| GOTERM_MF_FAT   | GO:0005198~structural molecule activity                 | 7.89E-21 | 2.3028 | 1.27E-17 |
| GOTERM_CC_FAT   | GO:0070013~intracellular organelle lumen                | 1.37E-20 | 1.7382 | 2.01E-17 |
| SP_PIR_KEYWORDS | ribosome                                                | 1.52E-19 | 8.1787 | 2.20E-16 |
| SP_PIR_KEYWORDS | electron transport                                      | 1.68E-19 | 4.0893 | 2.44E-16 |
| GOTERM_CC_FAT   | GO:0043232~intracellular non-membrane-bounded organelle | 3.54E-19 | 1.5109 | 5.19E-16 |
| GOTERM_CC_FAT   | GO:0043228~non-membrane-bounded organelle               | 3.54E-19 | 1.5109 | 5.19E-16 |
| GOTERM_BP_FAT   | GO:0008104~protein localization                         | 5.07E-19 | 1.9072 | 9.22E-16 |
| SP_PIR_KEYWORDS | nucleotide-binding                                      | 5.54E-19 | 1.5946 | 8.03E-16 |
| KEGG_PATHWAY    | mmu05010:Alzheimer's disease                            | 2.77E-18 | 2.7053 | 3.40E-15 |
| UP_SEQ_FEATURE  | transit peptide:Mitochondrion                           | 3.10E-18 | 2.1451 | 5.84E-15 |
| GOTERM_CC_FAT   | GO:0042470~melanosome                                   | 3.94E-18 | 4.1374 | 5.79E-15 |
| GOTERM_CC_FAT   | GO:0048770~pigment granule                              | 3.94E-18 | 4.1374 | 5.79E-15 |
| GOTERM_BP_FAT   | GO:0022900~electron transport chain                     | 7.12E-18 | 3.6636 | 1.30E-14 |
| GOTERM_BP_FAT   | GO:0015031~protein transport                            | 7.20E-18 | 1.9515 | 1.31E-14 |
| GOTERM_BP_FAT   | GO:0045184~establishment of protein localization        | 1.54E-17 | 1.9366 | 2.80E-14 |
| GOTERM_BP_FAT   | GO:0030163~protein catabolic process                    | 4.83E-16 | 1.9869 | 8.10E-13 |
| SP_PIR_KEYWORDS | transport                                               | 8.41E-16 | 1.5514 | 1.29E-12 |
| GOTERM_BP_FAT   | GO:0009057~macromolecule catabolic process              | 1.31E-15 | 1.8822 | 2.42E-12 |
| SP_PIR_KEYWORDS | proteasome                                              | 2.56E-15 | 4.8466 | 3.70E-12 |
| GOTERM_MF_FAT   | GO:0032553~ribonucleotide binding                       | 3.88E-15 | 1.4780 | 6.27E-12 |
| GOTERM_MF_FAT   | GO:0032555~purine ribonucleotide binding                | 3.88E-15 | 1.4780 | 6.27E-12 |
| SP_PIR_KEYWORDS | ubl conjugation                                         | 4.12E-15 | 2.0134 | 5.95E-12 |
| GOTERM_BP_FAT   | GO:0034613~cellular protein localization                | 6.67E-15 | 2.3488 | 1.21E-11 |
| GOTERM_MF_FAT   | GO:0017076~purine nucleotide binding                    | 7.04E-15 | 1.4613 | 1.13E-11 |
| SP_PIR_KEYWORDS | protein transport                                       | 9.06E-15 | 2.0757 | 1.32E-11 |
| GOTERM_BP_FAT   | GO:0070727~cellular macromolecule localization          | 1.03E-14 | 2.3332 | 1.88E-11 |
| GOTERM_MF_FAT   | GO:0015077~monovalent                                   | 1.40E-14 | 3.7565 | 2.26E-11 |

|                 |                                                                           |          |        |          |
|-----------------|---------------------------------------------------------------------------|----------|--------|----------|
|                 | inorganic cation transmembrane transporter activity                       |          |        |          |
| GOTERM_CC_FAT   | GO:0000502~proteasome complex                                             | 1.51E-14 | 4.4465 | 2.22E-11 |
| GOTERM_BP_FAT   | GO:0006457~protein folding                                                | 2.39E-14 | 3.1688 | 4.34E-11 |
| GOTERM_BP_FAT   | GO:0044257~cellular protein catabolic process                             | 2.50E-14 | 1.9396 | 4.55E-11 |
| GOTERM_BP_FAT   | GO:0006886~intracellular protein transport                                | 3.17E-14 | 2.3730 | 5.78E-11 |
| GOTERM_CC_FAT   | GO:0016023~cytoplasmic membrane-bounded vesicle                           | 3.35E-14 | 2.0764 | 4.92E-11 |
| GOTERM_BP_FAT   | GO:0051603~proteolysis involved in cellular protein catabolic process     | 3.69E-14 | 1.9358 | 6.71E-11 |
| GOTERM_CC_FAT   | GO:0031988~membrane-bounded vesicle                                       | 3.76E-14 | 2.0654 | 5.51E-11 |
| GOTERM_CC_FAT   | GO:0031982~vesicle                                                        | 3.79E-14 | 1.9425 | 5.56E-11 |
| GOTERM_CC_FAT   | GO:0031410~cytoplasmic vesicle                                            | 3.95E-14 | 1.9538 | 5.78E-11 |
| GOTERM_MF_FAT   | GO:0015078~hydrogen ion transmembrane transporter activity                | 4.67E-14 | 3.7912 | 7.53E-11 |
| GOTERM_BP_FAT   | GO:0044265~cellular macromolecule catabolic process                       | 9.06E-14 | 1.8529 | 1.65E-10 |
| GOTERM_BP_FAT   | GO:0043632~modification-dependent macromolecule catabolic process         | 1.22E-13 | 1.9416 | 2.22E-10 |
| GOTERM_BP_FAT   | GO:0019941~modification-dependent protein catabolic process               | 1.22E-13 | 1.9416 | 2.22E-10 |
| SP_PIR_KEYWORDS | mrna splicing                                                             | 1.40E-13 | 2.6977 | 2.02E-10 |
| GOTERM_BP_FAT   | GO:0008380~RNA splicing                                                   | 2.07E-13 | 2.5910 | 3.77E-10 |
| GOTERM_BP_FAT   | GO:0006119~oxidative phosphorylation                                      | 2.26E-13 | 4.3681 | 4.11E-10 |
| SP_PIR_KEYWORDS | ubl conjugation pathway                                                   | 3.30E-13 | 1.9771 | 4.79E-10 |
| SP_PIR_KEYWORDS | atp-binding                                                               | 3.42E-13 | 1.5569 | 4.96E-10 |
| GOTERM_BP_FAT   | GO:0006397~mRNA processing                                                | 3.64E-13 | 2.3492 | 6.62E-10 |
| SP_PIR_KEYWORDS | mrna processing                                                           | 4.35E-13 | 2.4536 | 6.31E-10 |
| GOTERM_CC_FAT   | GO:0016469~proton-transporting two-sector ATPase complex                  | 1.12E-12 | 4.8379 | 1.65E-09 |
| GOTERM_CC_FAT   | GO:0015934~large ribosomal subunit                                        | 1.14E-12 | 5.0096 | 1.68E-09 |
| SP_PIR_KEYWORDS | isopeptide bond                                                           | 1.55E-12 | 2.3030 | 2.25E-09 |
| GOTERM_BP_FAT   | GO:0015986~ATP synthesis coupled proton transport                         | 2.06E-12 | 5.1184 | 3.75E-09 |
| GOTERM_BP_FAT   | GO:0015985~energy coupled proton transport, down electrochemical gradient | 2.06E-12 | 5.1184 | 3.75E-09 |
| GOTERM_CC_FAT   | GO:0044445~cytosolic part                                                 | 2.29E-12 | 3.9695 | 3.36E-09 |
| GOTERM_BP_FAT   | GO:0016071~mRNA metabolic process                                         | 2.38E-12 | 2.1948 | 4.34E-09 |

|                 |                                                                                     |          |        |          |
|-----------------|-------------------------------------------------------------------------------------|----------|--------|----------|
| SP_PIR_KEYWORDS | Hydrogen ion transport                                                              | 3.58E-12 | 4.7254 | 5.19E-09 |
| GOTERM_CC_FAT   | GO:0015935~small ribosomal subunit                                                  | 3.89E-12 | 5.6591 | 5.71E-09 |
| GOTERM_MF_FAT   | GO:0051082~unfolded protein binding                                                 | 7.42E-12 | 3.7579 | 1.20E-08 |
| KEGG_PATHWAY    | mmu03050:Proteasome                                                                 | 8.75E-12 | 3.8949 | 1.08E-08 |
| SP_PIR_KEYWORDS | nucleus                                                                             | 1.42E-11 | 1.2650 | 2.05E-08 |
| GOTERM_BP_FAT   | GO:0009150~purine ribonucleotide metabolic process                                  | 4.41E-11 | 2.9176 | 8.02E-08 |
| GOTERM_MF_FAT   | GO:0032559~adenyl ribonucleotide binding                                            | 6.22E-11 | 1.4468 | 1.01E-07 |
| GOTERM_BP_FAT   | GO:0009152~purine ribonucleotide biosynthetic process                               | 6.24E-11 | 3.0236 | 1.14E-07 |
| GOTERM_BP_FAT   | GO:0034220~ion transmembrane transport                                              | 7.98E-11 | 4.5090 | 1.45E-07 |
| GOTERM_MF_FAT   | GO:0022890~inorganic cation transmembrane transporter activity                      | 9.24E-11 | 2.8244 | 1.49E-07 |
| GOTERM_MF_FAT   | GO:0030554~adenyl nucleotide binding                                                | 1.03E-10 | 1.4281 | 1.66E-07 |
| KEGG_PATHWAY    | mmu00020:Citrate cycle (TCA cycle)                                                  | 1.13E-10 | 4.4798 | 1.39E-07 |
| GOTERM_MF_FAT   | GO:0005524~ATP binding                                                              | 1.28E-10 | 1.4418 | 2.07E-07 |
| UP_SEQ_FEATURE  | cross-link:Glycyl lysine isopeptide (Lys-Gly) (interchain with G-Cter in ubiquitin) | 1.44E-10 | 2.4508 | 2.71E-07 |
| SP_PIR_KEYWORDS | methylation                                                                         | 1.52E-10 | 2.3315 | 2.20E-07 |
| GOTERM_MF_FAT   | GO:0001883~purine nucleoside binding                                                | 1.60E-10 | 1.4212 | 2.59E-07 |
| GOTERM_BP_FAT   | GO:0009260~ribonucleotide biosynthetic process                                      | 2.30E-10 | 2.9146 | 4.19E-07 |
| GOTERM_BP_FAT   | GO:0009259~ribonucleotide metabolic process                                         | 2.73E-10 | 2.7776 | 4.96E-07 |
| GOTERM_BP_FAT   | GO:0016192~vesicle-mediated transport                                               | 3.08E-10 | 1.8288 | 5.60E-07 |
| GOTERM_BP_FAT   | GO:0006396~RNA processing                                                           | 3.09E-10 | 1.8599 | 5.63E-07 |
| GOTERM_MF_FAT   | GO:0001882~nucleoside binding                                                       | 3.23E-10 | 1.4121 | 5.21E-07 |
| GOTERM_BP_FAT   | GO:0006099~tricarboxylic acid cycle                                                 | 4.20E-10 | 5.8323 | 7.64E-07 |
| GOTERM_CC_FAT   | GO:0005759~mitochondrial matrix                                                     | 4.24E-10 | 2.4931 | 6.23E-07 |
| GOTERM_CC_FAT   | GO:0031980~mitochondrial lumen                                                      | 4.24E-10 | 2.4931 | 6.23E-07 |
| INTERPRO        | IPR012677:Nucleotide-binding, alpha-beta plait                                      | 4.28E-10 | 2.3349 | 7.61E-07 |
| SP_PIR_KEYWORDS | Chaperone                                                                           | 4.69E-10 | 2.6172 | 6.80E-07 |
| GOTERM_BP_FAT   | GO:0019320~hexose catabolic process                                                 | 4.78E-10 | 3.9454 | 8.70E-07 |
| GOTERM_BP_FAT   | GO:0006007~glucose catabolic process                                                | 4.78E-10 | 3.9454 | 8.70E-07 |

|                 |                                                                            |          |        |          |
|-----------------|----------------------------------------------------------------------------|----------|--------|----------|
| GOTERM_BP_FAT   | GO:0015992~proton transport                                                | 4.78E-10 | 3.9454 | 8.70E-07 |
| GOTERM_CC_FAT   | GO:0022626~cytosolic ribosome                                              | 5.50E-10 | 6.5125 | 8.07E-07 |
| GOTERM_CC_FAT   | GO:0031981~nuclear lumen                                                   | 6.26E-10 | 1.5577 | 9.18E-07 |
| GOTERM_BP_FAT   | GO:0044275~cellular carbohydrate catabolic process                         | 6.34E-10 | 3.6824 | 1.15E-06 |
| SP_PIR_KEYWORDS | viral nucleoprotein                                                        | 7.17E-10 | 5.4524 | 1.04E-06 |
| GOTERM_BP_FAT   | GO:0006818~hydrogen transport                                              | 7.96E-10 | 3.8710 | 1.45E-06 |
| SMART           | SM00360:RRM                                                                | 8.97E-10 | 2.3716 | 1.23E-06 |
| SP_PIR_KEYWORDS | tricarboxylic acid cycle                                                   | 1.02E-09 | 6.4568 | 1.48E-06 |
| GOTERM_BP_FAT   | GO:0046356~acetyl-CoA catabolic process                                    | 1.11E-09 | 5.5893 | 2.02E-06 |
| GOTERM_BP_FAT   | GO:0006006~glucose metabolic process                                       | 1.30E-09 | 2.5927 | 2.36E-06 |
| GOTERM_BP_FAT   | GO:0046365~monosaccharide catabolic process                                | 1.30E-09 | 3.7993 | 2.37E-06 |
| KEGG_PATHWAY    | mmu03040:Spliceosome                                                       | 1.41E-09 | 2.4435 | 1.73E-06 |
| GOTERM_BP_FAT   | GO:0009142~nucleoside triphosphate biosynthetic process                    | 1.53E-09 | 2.9902 | 2.79E-06 |
| GOTERM_BP_FAT   | GO:0006096~glycolysis                                                      | 2.06E-09 | 4.1247 | 3.75E-06 |
| GOTERM_BP_FAT   | GO:0006084~acetyl-CoA metabolic process                                    | 2.60E-09 | 4.8363 | 4.73E-06 |
| GOTERM_MF_FAT   | GO:0008135~translation factor activity, nucleic acid binding               | 3.04E-09 | 2.9282 | 4.91E-06 |
| GOTERM_BP_FAT   | GO:0009201~ribonucleoside triphosphate biosynthetic process                | 3.31E-09 | 2.9697 | 6.03E-06 |
| GOTERM_BP_FAT   | GO:0009206~purine ribonucleoside triphosphate biosynthetic process         | 3.31E-09 | 2.9697 | 6.03E-06 |
| GOTERM_CC_FAT   | GO:0033178~proton-transporting two-sector ATPase complex, catalytic domain | 3.38E-09 | 6.4359 | 4.96E-06 |
| GOTERM_CC_FAT   | GO:0005681~spliceosome                                                     | 3.57E-09 | 2.6470 | 5.23E-06 |
| SP_PIR_KEYWORDS | endoplasmic reticulum                                                      | 3.89E-09 | 1.6406 | 5.64E-06 |
| GOTERM_BP_FAT   | GO:0015980~energy derivation by oxidation of organic compounds             | 4.00E-09 | 2.8987 | 7.28E-06 |
| SP_PIR_KEYWORDS | er-golgi transport                                                         | 4.41E-09 | 3.2093 | 6.38E-06 |
| GOTERM_BP_FAT   | GO:0009145~purine nucleoside triphosphate biosynthetic process             | 4.56E-09 | 2.9381 | 8.30E-06 |
| GOTERM_MF_FAT   | GO:0046961~proton-transporting ATPase activity, rotational mechanism       | 4.60E-09 | 6.9084 | 7.42E-06 |
| SP_PIR_KEYWORDS | Spliceosome                                                                | 4.96E-09 | 2.7999 | 7.19E-06 |
| SP_PIR_KEYWORDS | ligase                                                                     | 5.15E-09 | 2.0306 | 7.46E-06 |
| GOTERM_BP_FAT   | GO:0051187~cofactor catabolic process                                      | 5.24E-09 | 4.6852 | 9.53E-06 |
| GOTERM_BP_FAT   | GO:0009109~coenzyme catabolic process                                      | 5.93E-09 | 4.8978 | 1.08E-05 |
| GOTERM_BP_FAT   | GO:0006754~ATP biosynthetic                                                | 6.39E-09 | 3.0793 | 1.16E-05 |

|                 |                                                                                     |          |        |          |
|-----------------|-------------------------------------------------------------------------------------|----------|--------|----------|
|                 | process                                                                             |          |        |          |
| GOTERM_MF_FAT   | GO:0003743~translation initiation factor activity                                   | 6.66E-09 | 3.4713 | 1.08E-05 |
| GOTERM_CC_FAT   | GO:0012505~endomembrane system                                                      | 6.79E-09 | 1.6945 | 9.96E-06 |
| GOTERM_BP_FAT   | GO:0009205~purine ribonucleoside triphosphate metabolic process                     | 9.91E-09 | 2.8126 | 1.80E-05 |
| GOTERM_BP_FAT   | GO:0045333~cellular respiration                                                     | 1.24E-08 | 3.4773 | 2.26E-05 |
| GOTERM_BP_FAT   | GO:0009199~ribonucleoside triphosphate metabolic process                            | 1.33E-08 | 2.7850 | 2.42E-05 |
| GOTERM_BP_FAT   | GO:0009060~aerobic respiration                                                      | 1.35E-08 | 4.9683 | 2.46E-05 |
| INTERPRO        | IPR000504:RNA recognition motif, RNP-1                                              | 2.08E-08 | 2.1895 | 3.70E-05 |
| GOTERM_BP_FAT   | GO:0046034~ATP metabolic process                                                    | 2.08E-08 | 2.8933 | 3.79E-05 |
| GOTERM_BP_FAT   | GO:0006164~purine nucleotide biosynthetic process                                   | 2.18E-08 | 2.4767 | 3.97E-05 |
| SP_PIR_KEYWORDS | molecular chaperone                                                                 | 2.27E-08 | 7.0103 | 3.29E-05 |
| GOTERM_BP_FAT   | GO:0006413~translational initiation                                                 | 2.61E-08 | 4.1531 | 4.75E-05 |
| GOTERM_MF_FAT   | GO:0019829~cation-transporting ATPase activity                                      | 2.67E-08 | 5.1016 | 4.31E-05 |
| GOTERM_BP_FAT   | GO:0046164~alcohol catabolic process                                                | 2.70E-08 | 3.2777 | 4.92E-05 |
| GOTERM_MF_FAT   | GO:0019787~small conjugating protein ligase activity                                | 3.05E-08 | 2.5508 | 4.93E-05 |
| SP_PIR_KEYWORDS | Initiation factor                                                                   | 3.33E-08 | 3.5689 | 4.82E-05 |
| GOTERM_BP_FAT   | GO:0019318~hexose metabolic process                                                 | 3.34E-08 | 2.2879 | 6.09E-05 |
| GOTERM_BP_FAT   | GO:0009141~nucleoside triphosphate metabolic process                                | 3.64E-08 | 2.6074 | 6.63E-05 |
| GOTERM_CC_FAT   | GO:0005794~Golgi apparatus                                                          | 4.06E-08 | 1.5699 | 5.95E-05 |
| GOTERM_BP_FAT   | GO:0009144~purine nucleoside triphosphate metabolic process                         | 4.06E-08 | 2.6799 | 7.39E-05 |
| GOTERM_BP_FAT   | GO:0006163~purine nucleotide metabolic process                                      | 4.29E-08 | 2.3179 | 7.81E-05 |
| GOTERM_CC_FAT   | GO:0048475~coated membrane                                                          | 5.06E-08 | 3.3685 | 7.43E-05 |
| GOTERM_CC_FAT   | GO:0030117~membrane coat                                                            | 5.06E-08 | 3.3685 | 7.43E-05 |
| GOTERM_BP_FAT   | GO:0016052~carbohydrate catabolic process                                           | 7.97E-08 | 2.9225 | 1.45E-04 |
| GOTERM_CC_FAT   | GO:0005783~endoplasmic reticulum                                                    | 8.77E-08 | 1.4921 | 1.29E-04 |
| SP_PIR_KEYWORDS | glycolysis                                                                          | 1.14E-07 | 3.8946 | 1.65E-04 |
| GOTERM_CC_FAT   | GO:0005768~endosome                                                                 | 1.84E-07 | 1.9537 | 2.70E-04 |
| GOTERM_BP_FAT   | GO:0034404~nucleobase, nucleoside and nucleotide biosynthetic process               | 2.30E-07 | 2.1601 | 4.19E-04 |
| GOTERM_BP_FAT   | GO:0034654~nucleobase, nucleoside, nucleotide and nucleic acid biosynthetic process | 2.30E-07 | 2.1601 | 4.19E-04 |

|                 |                                                                                  |          |        |          |
|-----------------|----------------------------------------------------------------------------------|----------|--------|----------|
| SMART           | SM00320:WD40                                                                     | 2.49E-07 | 2.0106 | 3.41E-04 |
| GOTERM_MF_FAT   | GO:0016879~ligase activity, forming carbon-nitrogen bonds                        | 3.00E-07 | 2.1064 | 4.84E-04 |
| GOTERM_MF_FAT   | GO:0008092~cytoskeletal protein binding                                          | 3.06E-07 | 1.7136 | 4.94E-04 |
| GOTERM_MF_FAT   | GO:0046933~hydrogen ion transporting ATP synthase activity, rotational mechanism | 3.26E-07 | 7.2466 | 5.26E-04 |
| GOTERM_CC_FAT   | GO:0045259~proton-transporting ATP synthase complex                              | 3.89E-07 | 5.3471 | 5.71E-04 |
| GOTERM_MF_FAT   | GO:0042625~ATPase activity, coupled to transmembrane movement of ions            | 3.92E-07 | 3.0036 | 6.33E-04 |
| SP_PIR_KEYWORDS | golgi apparatus                                                                  | 3.95E-07 | 1.6121 | 5.72E-04 |
| GOTERM_CC_FAT   | GO:0009898~internal side of plasma membrane                                      | 4.85E-07 | 1.8516 | 7.12E-04 |
| GOTERM_BP_FAT   | GO:0005996~monosaccharide metabolic process                                      | 7.33E-07 | 2.0657 | 1.33E-03 |
| GOTERM_MF_FAT   | GO:0004842~ubiquitin-protein ligase activity                                     | 7.35E-07 | 2.5293 | 1.19E-03 |
| GOTERM_BP_FAT   | GO:0006605~protein targeting                                                     | 7.46E-07 | 2.3139 | 1.36E-03 |
| INTERPRO        | IPR019775:WD40 repeat, conserved site                                            | 7.50E-07 | 1.9276 | 1.33E-03 |
| GOTERM_CC_FAT   | GO:0005762~mitochondrial large ribosomal subunit                                 | 7.68E-07 | 4.7570 | 1.13E-03 |
| GOTERM_CC_FAT   | GO:0000315~organellar large ribosomal subunit                                    | 7.68E-07 | 4.7570 | 1.13E-03 |
| GOTERM_MF_FAT   | GO:0016881~acid-amino acid ligase activity                                       | 7.72E-07 | 2.1609 | 1.25E-03 |
| GOTERM_MF_FAT   | GO:0043021~ribonucleoprotein binding                                             | 8.28E-07 | 3.9856 | 1.34E-03 |
| GOTERM_CC_FAT   | GO:0005761~mitochondrial ribosome                                                | 8.32E-07 | 3.6216 | 1.22E-03 |
| GOTERM_CC_FAT   | GO:0000313~organellar ribosome                                                   | 8.32E-07 | 3.6216 | 1.22E-03 |
| SP_PIR_KEYWORDS | endosome                                                                         | 8.38E-07 | 2.0653 | 1.21E-03 |
| GOTERM_BP_FAT   | GO:0045454~cell redox homeostasis                                                | 8.41E-07 | 3.0545 | 1.53E-03 |
| SP_PIR_KEYWORDS | wd repeat                                                                        | 1.03E-06 | 1.8969 | 1.50E-03 |
| GOTERM_MF_FAT   | GO:0042623~ATPase activity, coupled                                              | 1.05E-06 | 1.9660 | 1.69E-03 |
| GOTERM_BP_FAT   | GO:0019725~cellular homeostasis                                                  | 1.10E-06 | 1.7484 | 2.01E-03 |
| GOTERM_MF_FAT   | GO:0019843~rRNA binding                                                          | 1.18E-06 | 4.6499 | 1.90E-03 |
| GOTERM_CC_FAT   | GO:0030135~coated vesicle                                                        | 1.19E-06 | 2.3319 | 1.74E-03 |
| GOTERM_BP_FAT   | GO:0034621~cellular macromolecular complex subunit organization                  | 1.31E-06 | 1.9002 | 2.39E-03 |
| GOTERM_BP_FAT   | GO:0034622~cellular macromolecular complex assembly                              | 1.36E-06 | 1.9636 | 2.48E-03 |
| GOTERM_BP_FAT   | GO:0009165~nucleotide                                                            | 1.62E-06 | 2.0861 | 2.95E-03 |

|                 |                                                                         |          |        |          |
|-----------------|-------------------------------------------------------------------------|----------|--------|----------|
|                 | biosynthetic process                                                    |          |        |          |
| INTERPRO        | IPR019781:WD40 repeat, subgroup                                         | 1.86E-06 | 1.9399 | 3.31E-03 |
| GOTERM_CC_FAT   | GO:0031252~cell leading edge                                            | 2.28E-06 | 2.3724 | 3.35E-03 |
| GOTERM_MF_FAT   | GO:0016887~ATPase activity                                              | 2.35E-06 | 1.8155 | 3.79E-03 |
| SP_PIR_KEYWORDS | RNA binding                                                             | 2.70E-06 | 6.2913 | 3.91E-03 |
| SP_PIR_KEYWORDS | gtp-binding                                                             | 2.75E-06 | 1.7768 | 3.99E-03 |
| GOTERM_BP_FAT   | GO:0006417~regulation of translation                                    | 3.59E-06 | 2.4462 | 6.53E-03 |
| GOTERM_BP_FAT   | GO:0030705~cytoskeleton-dependent intracellular transport               | 3.60E-06 | 3.8259 | 6.55E-03 |
| INTERPRO        | IPR017986:WD40 repeat, region                                           | 3.61E-06 | 1.9268 | 6.43E-03 |
| UP_SEQ_FEATURE  | domain:PCI                                                              | 3.62E-06 | 4.9016 | 6.82E-03 |
| INTERPRO        | IPR001680:WD40 repeat                                                   | 4.10E-06 | 1.8562 | 7.30E-03 |
| GOTERM_BP_FAT   | GO:0010608~posttranscriptional regulation of gene expression            | 4.83E-06 | 2.1327 | 8.78E-03 |
| GOTERM_CC_FAT   | GO:0030027~lamellipodium                                                | 5.42E-06 | 2.8531 | 7.96E-03 |
| GOTERM_CC_FAT   | GO:0005654~nucleoplasm                                                  | 5.51E-06 | 1.5004 | 8.09E-03 |
| SP_PIR_KEYWORDS | blocked amino end                                                       | 5.53E-06 | 3.9574 | 8.01E-03 |
| SP_PIR_KEYWORDS | nitration                                                               | 5.69E-06 | 3.7388 | 8.24E-03 |
| GOTERM_CC_FAT   | GO:0016585~chromatin remodeling complex                                 | 5.70E-06 | 3.1260 | 8.36E-03 |
| INTERPRO        | IPR019782:WD40 repeat 2                                                 | 6.07E-06 | 1.9366 | 1.08E-02 |
| GOTERM_CC_FAT   | GO:0008287~protein serine/threonine phosphatase complex                 | 6.40E-06 | 3.6776 | 9.39E-03 |
| KEGG_PATHWAY    | mmu04120:Ubiquitin mediated proteolysis                                 | 6.62E-06 | 1.9958 | 8.13E-03 |
| GOTERM_BP_FAT   | GO:0043623~cellular protein complex assembly                            | 6.86E-06 | 2.3380 | 1.25E-02 |
| SP_PIR_KEYWORDS | ubiquinone                                                              | 7.05E-06 | 4.4301 | 1.02E-02 |
| GOTERM_BP_FAT   | GO:0055114~oxidation reduction                                          | 7.16E-06 | 1.4678 | 1.30E-02 |
| GOTERM_BP_FAT   | GO:0032446~protein modification by small protein conjugation            | 8.08E-06 | 2.5970 | 1.47E-02 |
| GOTERM_BP_FAT   | GO:0070647~protein modification by small protein conjugation or removal | 8.62E-06 | 2.3521 | 1.57E-02 |
| GOTERM_MF_FAT   | GO:0050136~NADH dehydrogenase (quinone) activity                        | 9.15E-06 | 4.3177 | 1.48E-02 |
| GOTERM_MF_FAT   | GO:0003954~NADH dehydrogenase activity                                  | 9.15E-06 | 4.3177 | 1.48E-02 |
| GOTERM_MF_FAT   | GO:0008137~NADH dehydrogenase (ubiquinone) activity                     | 9.15E-06 | 4.3177 | 1.48E-02 |
| GOTERM_BP_FAT   | GO:0006511~ubiquitin-dependent protein catabolic process                | 9.29E-06 | 2.1266 | 1.69E-02 |
| GOTERM_MF_FAT   | GO:0008565~protein transporter activity                                 | 9.33E-06 | 2.7778 | 1.51E-02 |

|                 |                                                               |          |        |          |
|-----------------|---------------------------------------------------------------|----------|--------|----------|
| GOTERM_BP_FAT   | GO:0006796~phosphate metabolic process                        | 1.19E-05 | 1.3941 | 2.17E-02 |
| GOTERM_BP_FAT   | GO:0006793~phosphorus metabolic process                       | 1.19E-05 | 1.3941 | 2.17E-02 |
| GOTERM_BP_FAT   | GO:0033043~regulation of organelle organization               | 1.34E-05 | 2.0496 | 2.43E-02 |
| GOTERM_CC_FAT   | GO:0030120~vesicle coat                                       | 1.35E-05 | 3.9075 | 1.98E-02 |
| SMART           | SM00088:PINT                                                  | 1.40E-05 | 5.6115 | 1.91E-02 |
| SP_PIR_KEYWORDS | mitochondrion outer membrane                                  | 1.40E-05 | 2.7262 | 2.03E-02 |
| UP_SEQ_FEATURE  | nucleotide phosphate-binding region:GTP                       | 1.45E-05 | 1.7174 | 2.73E-02 |
| GOTERM_CC_FAT   | GO:0005905~coated pit                                         | 1.47E-05 | 3.6633 | 2.15E-02 |
| GOTERM_CC_FAT   | GO:0000118~histone deacetylase complex                        | 1.47E-05 | 3.6633 | 2.15E-02 |
| SP_PIR_KEYWORDS | rrna-binding                                                  | 1.50E-05 | 5.4524 | 2.17E-02 |
| GOTERM_BP_FAT   | GO:0007264~small GTPase mediated signal transduction          | 1.52E-05 | 1.7739 | 2.77E-02 |
| GOTERM_CC_FAT   | GO:0030662~coated vesicle membrane                            | 1.53E-05 | 2.9491 | 2.24E-02 |
| GOTERM_MF_FAT   | GO:0003729~mRNA binding                                       | 1.57E-05 | 2.9523 | 2.53E-02 |
| SP_PIR_KEYWORDS | kinase                                                        | 1.64E-05 | 1.4460 | 2.38E-02 |
| GOTERM_CC_FAT   | GO:0033176~proton-transporting V-type ATPase complex          | 1.88E-05 | 4.7758 | 2.75E-02 |
| INTERPRO        | IPR005225:Small GTP-binding protein                           | 2.09E-05 | 2.0217 | 3.72E-02 |
| GOTERM_CC_FAT   | GO:0005852~eukaryotic translation initiation factor 3 complex | 2.16E-05 | 5.8613 | 3.17E-02 |
| GOTERM_MF_FAT   | GO:0016651~oxidoreductase activity, acting on NADH or NADPH   | 2.49E-05 | 2.9697 | 4.01E-02 |
| GOTERM_CC_FAT   | GO:0005832~chaperonin-containing T-complex                    | 2.70E-05 | 7.8150 | 3.97E-02 |
| SP_PIR_KEYWORDS | Redox-active center                                           | 2.73E-05 | 3.3553 | 3.96E-02 |
| SP_PIR_KEYWORDS | Aminoacyl-tRNA synthetase                                     | 2.73E-05 | 3.3553 | 3.96E-02 |
| GOTERM_BP_FAT   | GO:0043933~macromolecular complex subunit organization        | 2.74E-05 | 1.6126 | 4.98E-02 |
| INTERPRO        | IPR000717:Proteasome component region PCI                     | 2.74E-05 | 5.1805 | 4.87E-02 |
| PIR_SUPERFAMILY | PIRSF002584:molecular chaperone t-complex-type                | 2.98E-05 | 6.3106 | 4.81E-02 |
| GOTERM_CC_FAT   | GO:0000151~ubiquitin ligase complex                           | 3.14E-05 | 2.7353 | 4.61E-02 |
| GOTERM_CC_FAT   | GO:0030118~clathrin coat                                      | 3.38E-05 | 3.4478 | 4.96E-02 |



## SI\_Sheets\_S3

DMS 10dpi

| seqnames | start     | end       | log2.RR    | pvalue    | padj      | GENE_SYMBOL  |
|----------|-----------|-----------|------------|-----------|-----------|--------------|
| chr4     | 1193043   | 1193043   | 1.2696E+00 | 1.42E-250 | 2.74E-246 | LOC100130872 |
| chr4     | 1193063   | 1193063   | 1.0646E+00 | 8.32E-238 | 8.03E-234 | LOC100130872 |
| chr4     | 1193053   | 1193053   | 1.1573E+00 | 9.58E-233 | 6.16E-229 | LOC100130872 |
| chr4     | 1193052   | 1193052   | 1.2227E+00 | 3.80E-228 | 1.84E-224 | LOC100130872 |
| chr4     | 1193072   | 1193072   | 1.1284E+00 | 2.76E-227 | 1.07E-223 | LOC100130872 |
| chr4     | 1193045   | 1193045   | 1.0930E+00 | 1.63E-226 | 5.25E-223 | LOC100130872 |
| chr4     | 1193050   | 1193050   | 1.0026E+00 | 9.09E-217 | 2.51E-213 | LOC100130872 |
| chr4     | 1193047   | 1193047   | 1.0592E+00 | 3.56E-207 | 8.60E-204 | LOC100130872 |
| chr4     | 1193049   | 1193049   | 8.7507E-01 | 6.70E-197 | 1.44E-193 | LOC100130872 |
| chr4     | 1193079   | 1193079   | 1.2792E+00 | 2.21E-196 | 4.26E-193 | LOC100130872 |
| chr4     | 1193080   | 1193080   | 1.3185E+00 | 2.29E-189 | 4.02E-186 | LOC100130872 |
| chr4     | 1193055   | 1193055   | 1.0996E+00 | 4.35E-177 | 7.00E-174 | LOC100130872 |
| chr4     | 1193040   | 1193040   | 1.1545E+00 | 2.72E-156 | 4.04E-153 | LOC100130872 |
| chr4     | 166263650 | 166263650 | 5.4550E-01 | 4.65E-88  | 6.41E-85  | MSMO1        |
| chr4     | 166263634 | 166263634 | 5.9566E-01 | 1.64E-83  | 2.11E-80  | MSMO1        |
| chr4     | 166263641 | 166263641 | 4.6154E-01 | 2.82E-74  | 3.40E-71  | MSMO1        |
| chr4     | 166263630 | 166263630 | 5.2636E-01 | 8.14E-71  | 9.24E-68  | MSMO1        |
| chr4     | 166263629 | 166263629 | 4.0942E-01 | 2.56E-58  | 2.75E-55  | MSMO1        |
| chr4     | 166263632 | 166263632 | 4.6409E-01 | 4.60E-56  | 4.67E-53  | MSMO1        |
| chr4     | 177252863 | 177252863 | 9.3232E-01 | 2.94E-54  | 2.84E-51  | SPCS3        |
| chr4     | 177252862 | 177252862 | 1.1693E+00 | 1.95E-53  | 1.79E-50  | SPCS3        |
| chr4     | 177252859 | 177252859 | 9.9318E-01 | 1.83E-52  | 1.61E-49  | SPCS3        |
| chrX     | 24095306  | 24095306  | 2.6993E-01 | 2.26E-48  | 1.90E-45  | EIF2S3       |
| chrX     | 24095305  | 24095305  | 2.4194E-01 | 2.13E-46  | 1.71E-43  | EIF2S3       |
| chrX     | 24095310  | 24095310  | 2.4629E-01 | 3.97E-46  | 3.06E-43  | EIF2S3       |
| chr4     | 177252860 | 177252860 | 8.8821E-01 | 2.91E-45  | 2.16E-42  | SPCS3        |
| chrX     | 24095317  | 24095317  | 4.2728E-01 | 2.80E-44  | 2.00E-41  | EIF2S3       |
| chrX     | 24095308  | 24095308  | 2.4997E-01 | 1.39E-43  | 9.59E-41  | EIF2S3       |
| chrX     | 24095309  | 24095309  | 2.4299E-01 | 6.77E-43  | 4.51E-40  | EIF2S3       |
| chr6     | 34845930  | 34845930  | 1.8722E+00 | 3.33E-38  | 2.14E-35  | TAF11        |
| chr6     | 34845926  | 34845926  | 1.8794E+00 | 4.24E-38  | 2.64E-35  | TAF11        |
| chr4     | 166263626 | 166263626 | 5.2192E-01 | 8.02E-38  | 4.84E-35  | MSMO1        |
| chr4     | 159630561 | 159630561 | 9.2519E-01 | 1.77E-37  | 1.04E-34  | PPID         |
| chr6     | 34845924  | 34845924  | 1.6540E+00 | 2.59E-37  | 1.47E-34  | TAF11        |
| chr4     | 177252856 | 177252856 | 8.5357E-01 | 8.41E-37  | 4.64E-34  | SPCS3        |

|       |           |           |            |          |          |           |
|-------|-----------|-----------|------------|----------|----------|-----------|
| chr6  | 34845937  | 34845937  | 2.4233E+00 | 9.88E-37 | 5.30E-34 | TAF11     |
| chr4  | 159630555 | 159630555 | 1.1063E+00 | 1.99E-36 | 1.04E-33 | PPID      |
| chr6  | 34845923  | 34845923  | 1.6412E+00 | 4.99E-36 | 2.54E-33 | TAF11     |
| chr4  | 177252880 | 177252880 | 1.2255E+00 | 9.22E-35 | 4.56E-32 | SPCS3     |
| chr14 | 93649148  | 93649148  | 9.2888E-01 | 1.21E-34 | 5.74E-32 | MOAP1     |
| chr14 | 93649152  | 93649152  | 9.6882E-01 | 1.22E-34 | 5.74E-32 | MOAP1     |
| chr14 | 93649155  | 93649155  | 9.5102E-01 | 4.17E-34 | 1.92E-31 | MOAP1     |
| chr4  | 177252893 | 177252893 | 9.6778E-01 | 4.83E-34 | 2.17E-31 | SPCS3     |
| chr4  | 159630547 | 159630547 | 9.9525E-01 | 1.61E-33 | 7.04E-31 | PPID      |
| chr4  | 177252896 | 177252896 | 1.0669E+00 | 3.23E-33 | 1.38E-30 | SPCS3     |
| chr4  | 177252894 | 177252894 | 1.1281E+00 | 3.35E-33 | 1.40E-30 | SPCS3     |
| chrX  | 24095302  | 24095302  | 2.2844E-01 | 7.64E-33 | 3.14E-30 | EIF2S3    |
| chr14 | 93649141  | 93649141  | 1.1583E+00 | 1.42E-32 | 5.70E-30 | MOAP1     |
| chr6  | 34845932  | 34845932  | 1.6055E+00 | 5.72E-32 | 2.26E-29 | TAF11     |
| chr6  | 34845935  | 34845935  | 1.6044E+00 | 5.88E-32 | 2.27E-29 | TAF11     |
| chr6  | 34845933  | 34845933  | 1.4180E+00 | 5.82E-31 | 2.20E-28 | TAF11     |
| chr19 | 24010197  | 24010197  | 3.0463E-02 | 2.90E-30 | 1.08E-27 | RPSAP58   |
| chr1  | 36929796  | 36929796  | 1.5017E+00 | 5.02E-30 | 1.83E-27 | MRPS15    |
| chr6  | 34845936  | 34845936  | 1.2641E+00 | 8.90E-30 | 3.18E-27 | TAF11     |
| chr4  | 177252853 | 177252853 | 1.2567E+00 | 2.72E-29 | 9.57E-27 | SPCS3     |
| chr4  | 177252854 | 177252854 | 8.3436E-01 | 6.03E-29 | 2.08E-26 | SPCS3     |
| chr4  | 1813547   | 1813547   | 5.3746E-01 | 1.01E-28 | 3.43E-26 | LETM1     |
| chr4  | 159630548 | 159630548 | 6.4426E-01 | 2.10E-28 | 6.99E-26 | PPID      |
| chr14 | 93649161  | 93649161  | 9.4407E-01 | 5.58E-28 | 1.83E-25 | MOAP1     |
| chr14 | 93649139  | 93649139  | 9.5637E-01 | 1.18E-27 | 3.81E-25 | MOAP1     |
| chr4  | 159630545 | 159630545 | 1.2882E+00 | 1.49E-27 | 4.71E-25 | PPID      |
| chr8  | 22878091  | 22878091  | 1.1032E+00 | 1.82E-27 | 5.66E-25 | TNFRSF10B |
| chrX  | 24095300  | 24095300  | 2.5205E-01 | 2.33E-27 | 7.13E-25 | EIF2S3    |
| chr6  | 34845906  | 34845906  | 1.5231E+00 | 1.13E-26 | 3.42E-24 | TAF11     |
| chr1  | 36929785  | 36929785  | 1.7138E+00 | 3.26E-26 | 9.68E-24 | MRPS15    |
| chrX  | 24095336  | 24095336  | 8.2306E-01 | 5.13E-26 | 1.50E-23 | EIF2S3    |
| chr14 | 93649142  | 93649142  | 1.0066E+00 | 1.18E-25 | 3.39E-23 | MOAP1     |
| chrX  | 24095299  | 24095299  | 2.5543E-01 | 1.71E-25 | 4.78E-23 | EIF2S3    |
| chr11 | 8941469   | 8941469   | 7.7907E-01 | 1.71E-25 | 4.78E-23 | AKIP1     |
| chr12 | 2997810   | 2997810   | 8.3608E-01 | 2.14E-25 | 5.91E-23 | RHNO1     |
| chr1  | 36929808  | 36929808  | 1.1389E+00 | 2.60E-25 | 7.08E-23 | MRPS15    |
| chr14 | 93649136  | 93649136  | 1.0979E+00 | 6.37E-25 | 1.71E-22 | MOAP1     |
| chr8  | 22878103  | 22878103  | 1.1139E+00 | 9.98E-25 | 2.64E-22 | TNFRSF10B |
| chr1  | 36929809  | 36929809  | 1.1195E+00 | 1.27E-24 | 3.32E-22 | MRPS15    |
| chr1  | 36929804  | 36929804  | 1.3816E+00 | 3.66E-24 | 9.42E-22 | MRPS15    |
| chr14 | 93649168  | 93649168  | 1.0345E+00 | 4.63E-24 | 1.18E-21 | MOAP1     |

|       |           |           |            |          |          |           |
|-------|-----------|-----------|------------|----------|----------|-----------|
| chr7  | 56148077  | 56148077  | 1.7341E-01 | 4.72E-24 | 1.18E-21 | SUMF2     |
| chr7  | 56148079  | 56148079  | 1.6855E-01 | 8.10E-24 | 1.99E-21 | SUMF2     |
| chr6  | 34845915  | 34845915  | 1.3988E+00 | 8.15E-24 | 1.99E-21 | TAF11     |
| chr11 | 8941308   | 8941308   | 5.2709E-01 | 1.30E-23 | 3.14E-21 | AKIP1     |
| chr11 | 6505467   | 6505467   | 9.3251E-01 | 1.49E-23 | 3.55E-21 | TIMM10B   |
| chr8  | 22878100  | 22878100  | 1.1764E+00 | 2.26E-23 | 5.31E-21 | TNFRSF10B |
| chr12 | 2997814   | 2997814   | 6.4243E-01 | 3.17E-23 | 7.38E-21 | RHNO1     |
| chr8  | 22878102  | 22878102  | 1.0071E+00 | 3.61E-23 | 8.30E-21 | TNFRSF10B |
| chr11 | 8941473   | 8941473   | 7.5632E-01 | 5.51E-23 | 1.25E-20 | AKIP1     |
| chr7  | 56148080  | 56148080  | 1.6563E-01 | 6.22E-23 | 1.40E-20 | SUMF2     |
| chr14 | 93649138  | 93649138  | 8.2664E-01 | 7.23E-23 | 1.61E-20 | MOAP1     |
| chr8  | 22878099  | 22878099  | 1.0150E+00 | 8.26E-23 | 1.81E-20 | TNFRSF10B |
| chr14 | 93649169  | 93649169  | 1.0719E+00 | 8.38E-23 | 1.82E-20 | MOAP1     |
| chr4  | 4237880   | 4237880   | 1.5283E+00 | 1.20E-22 | 2.57E-20 | TMEM128   |
| chr17 | 57188015  | 57188015  | 4.0766E-01 | 1.57E-22 | 3.33E-20 | SKA2      |
| chr11 | 8941307   | 8941307   | 5.5842E-01 | 1.83E-22 | 3.84E-20 | AKIP1     |
| chr11 | 8941230   | 8941230   | 8.5651E-01 | 3.28E-22 | 6.80E-20 | AKIP1     |
| chr17 | 57188014  | 57188014  | 4.5292E-01 | 3.87E-22 | 7.95E-20 | SKA2      |
| chr12 | 2997808   | 2997808   | 7.3257E-01 | 5.64E-22 | 1.15E-19 | RHNO1     |
| chr7  | 56148073  | 56148073  | 1.6818E-01 | 7.32E-22 | 1.47E-19 | SUMF2     |
| chr12 | 2997807   | 2997807   | 7.3604E-01 | 1.12E-21 | 2.22E-19 | RHNO1     |
| chr11 | 8941477   | 8941477   | 7.2303E-01 | 1.13E-21 | 2.23E-19 | AKIP1     |
| chr4  | 4237884   | 4237884   | 1.6046E+00 | 1.80E-21 | 3.51E-19 | TMEM128   |
| chr6  | 34845909  | 34845909  | 1.3242E+00 | 1.90E-21 | 3.66E-19 | TAF11     |
| chr11 | 6505473   | 6505473   | 7.8791E-01 | 5.63E-21 | 1.08E-18 | TIMM10B   |
| chr11 | 6505472   | 6505472   | 5.9237E-01 | 5.76E-21 | 1.09E-18 | TIMM10B   |
| chr11 | 8941306   | 8941306   | 5.2515E-01 | 7.61E-21 | 1.43E-18 | AKIP1     |
| chr9  | 33046789  | 33046789  | 8.1053E-01 | 8.29E-21 | 1.54E-18 | SMU1      |
| chr11 | 8941304   | 8941304   | 4.5016E-01 | 9.97E-21 | 1.83E-18 | AKIP1     |
| chr1  | 36929787  | 36929787  | 9.8671E-01 | 1.55E-20 | 2.82E-18 | MRPS15    |
| chr3  | 10143193  | 10143193  | 3.6611E-01 | 1.75E-20 | 3.16E-18 | FANCD2    |
| chr11 | 8941470   | 8941470   | 5.8628E-01 | 2.37E-20 | 4.24E-18 | AKIP1     |
| chr1  | 36929810  | 36929810  | 1.4377E+00 | 2.58E-20 | 4.57E-18 | MRPS15    |
| chr1  | 3697433   | 3697433   | 8.5769E-01 | 6.31E-20 | 1.11E-17 | LRRC47    |
| chr9  | 33046786  | 33046786  | 8.3292E-01 | 6.77E-20 | 1.18E-17 | SMU1      |
| chr1  | 3697438   | 3697438   | 8.7067E-01 | 7.69E-20 | 1.33E-17 | LRRC47    |
| chr7  | 56148088  | 56148088  | 1.3531E-01 | 1.14E-19 | 1.95E-17 | SUMF2     |
| chr4  | 4237894   | 4237894   | 1.5393E+00 | 1.30E-19 | 2.20E-17 | TMEM128   |
| chr7  | 102277721 | 102277721 | 4.8937E-01 | 1.36E-19 | 2.28E-17 | POLR2J2   |
| chr7  | 56148071  | 56148071  | 1.6627E-01 | 1.41E-19 | 2.36E-17 | SUMF2     |
| chr9  | 33046785  | 33046785  | 8.0262E-01 | 1.45E-19 | 2.40E-17 | SMU1      |

|       |          |          |            |          |          |           |
|-------|----------|----------|------------|----------|----------|-----------|
| chr17 | 57188012 | 57188012 | 4.3694E-01 | 1.85E-19 | 3.02E-17 | SKA2      |
| chr7  | 56148070 | 56148070 | 1.6594E-01 | 2.05E-19 | 3.32E-17 | SUMF2     |
| chr12 | 2997813  | 2997813  | 6.1995E-01 | 2.28E-19 | 3.67E-17 | RHNO1     |
| chr3  | 10143190 | 10143190 | 3.9707E-01 | 2.35E-19 | 3.75E-17 | FANCD2    |
| chrX  | 24095249 | 24095249 | 2.8945E-01 | 2.59E-19 | 4.10E-17 | EIF2S3    |
| chr12 | 2997804  | 2997804  | 1.1549E+00 | 2.78E-19 | 4.37E-17 | RHNO1     |
| chr3  | 10143189 | 10143189 | 3.9342E-01 | 2.92E-19 | 4.55E-17 | FANCD2    |
| chr7  | 56148076 | 56148076 | 1.4129E-01 | 3.07E-19 | 4.75E-17 | SUMF2     |
| chr1  | 36929784 | 36929784 | 1.6919E+00 | 3.14E-19 | 4.81E-17 | MRPS15    |
| chr11 | 8941303  | 8941303  | 4.7739E-01 | 3.66E-19 | 5.57E-17 | AKIP1     |
| chr1  | 3697437  | 3697437  | 7.8978E-01 | 4.10E-19 | 6.18E-17 | LRRC47    |
| chr11 | 8941478  | 8941478  | 6.5029E-01 | 5.15E-19 | 7.71E-17 | AKIP1     |
| chr4  | 1813546  | 1813546  | 5.3354E-01 | 6.64E-19 | 9.86E-17 | LETM1     |
| chr11 | 8941472  | 8941472  | 5.2676E-01 | 8.15E-19 | 1.20E-16 | AKIP1     |
| chr9  | 33046787 | 33046787 | 7.5267E-01 | 9.33E-19 | 1.36E-16 | SMU1      |
| chr11 | 8941479  | 8941479  | 7.0887E-01 | 1.04E-18 | 1.51E-16 | AKIP1     |
| chr4  | 1813544  | 1813544  | 5.2434E-01 | 1.29E-18 | 1.86E-16 | LETM1     |
| chr12 | 2997818  | 2997818  | 6.5366E-01 | 1.30E-18 | 1.86E-16 | RHNO1     |
| chr1  | 3697434  | 3697434  | 7.5022E-01 | 2.10E-18 | 2.98E-16 | LRRC47    |
| chr9  | 33046778 | 33046778 | 6.3568E-01 | 2.94E-18 | 4.15E-16 | SMU1      |
| chr1  | 3697435  | 3697435  | 8.0399E-01 | 3.10E-18 | 4.33E-16 | LRRC47    |
| chr17 | 43002695 | 43002695 | 5.1223E-01 | 3.28E-18 | 4.55E-16 | KIF18B    |
| chr8  | 22878106 | 22878106 | 1.1282E+00 | 4.24E-18 | 5.85E-16 | TNFRSF10B |
| chr11 | 6505441  | 6505441  | 8.1152E-01 | 4.76E-18 | 6.52E-16 | TIMM10B   |
| chr4  | 4237883  | 4237883  | 1.6802E+00 | 5.18E-18 | 7.04E-16 | TMEM128   |
| chr4  | 4237881  | 4237881  | 1.3273E+00 | 6.52E-18 | 8.80E-16 | TMEM128   |
| chr12 | 2997801  | 2997801  | 1.9155E+00 | 8.87E-18 | 1.19E-15 | RHNO1     |
| chr9  | 33046790 | 33046790 | 7.6312E-01 | 1.48E-17 | 1.98E-15 | SMU1      |
| chr17 | 38458731 | 38458731 | 4.1364E-01 | 1.51E-17 | 2.00E-15 | CDC6      |
| chr11 | 6505475  | 6505475  | 8.1417E-01 | 1.97E-17 | 2.58E-15 | TIMM10B   |
| chr1  | 3697441  | 3697441  | 9.2443E-01 | 3.26E-17 | 4.26E-15 | LRRC47    |
| chr3  | 10143184 | 10143184 | 3.5021E-01 | 3.59E-17 | 4.66E-15 | FANCD2    |
| chr11 | 8941475  | 8941475  | 5.2967E-01 | 7.90E-17 | 1.02E-14 | AKIP1     |
| chr4  | 4237876  | 4237876  | 1.8080E+00 | 1.25E-16 | 1.59E-14 | TMEM128   |
| chr11 | 6505443  | 6505443  | 7.1960E-01 | 1.39E-16 | 1.76E-14 | TIMM10B   |
| chr17 | 57188028 | 57188028 | 4.6837E-01 | 2.61E-16 | 3.29E-14 | SKA2      |
| chr14 | 93649170 | 93649170 | 1.0235E+00 | 2.83E-16 | 3.55E-14 | MOAP1     |
| chr8  | 22878108 | 22878108 | 1.1105E+00 | 3.52E-16 | 4.38E-14 | TNFRSF10B |
| chr3  | 33184297 | 33184297 | 1.9300E+00 | 6.60E-16 | 8.17E-14 | CRTAP     |
| chr17 | 38458730 | 38458730 | 4.2460E-01 | 8.42E-16 | 1.04E-13 | CDC6      |
| chr3  | 10143192 | 10143192 | 3.4217E-01 | 8.95E-16 | 1.09E-13 | FANCD2    |

|       |           |           |            |          |          |           |
|-------|-----------|-----------|------------|----------|----------|-----------|
| chr12 | 2997817   | 2997817   | 6.6695E-01 | 1.66E-15 | 2.01E-13 | RHNO1     |
| chr16 | 8947812   | 8947812   | 1.8285E+00 | 1.97E-15 | 2.38E-13 | CARHSP1   |
| chr7  | 102277724 | 102277724 | 4.6239E-01 | 2.44E-15 | 2.93E-13 | POLR2J2   |
| chrX  | 24095337  | 24095337  | 5.9236E-01 | 2.55E-15 | 3.04E-13 | EIF2S3    |
| chr4  | 4237897   | 4237897   | 1.7114E+00 | 3.20E-15 | 3.80E-13 | TMEM128   |
| chr17 | 38458729  | 38458729  | 4.0552E-01 | 3.74E-15 | 4.40E-13 | CDC6      |
| chr19 | 17453208  | 17453208  | 8.1805E-01 | 4.52E-15 | 5.29E-13 | GTPBP3    |
| chr1  | 3806145   | 3806145   | 1.2202E+00 | 4.65E-15 | 5.40E-13 | C1orf174  |
| chr1  | 21070460  | 21070460  | 6.9447E-01 | 4.69E-15 | 5.42E-13 | HP1BP3    |
| chr17 | 43002710  | 43002710  | 5.0059E-01 | 4.81E-15 | 5.53E-13 | KIF18B    |
| chr11 | 6505439   | 6505439   | 6.0934E-01 | 5.40E-15 | 6.17E-13 | TIMM10B   |
| chr11 | 8941300   | 8941300   | 5.5863E-01 | 5.76E-15 | 6.54E-13 | AKIP1     |
| chr3  | 10143186  | 10143186  | 3.7880E-01 | 7.85E-15 | 8.87E-13 | FANCD2    |
| chr4  | 6718853   | 6718853   | 7.2640E-01 | 9.57E-15 | 1.07E-12 | BLOC1S4   |
| chr20 | 49577403  | 49577403  | 7.6002E-01 | 9.65E-15 | 1.08E-12 | MOCS3     |
| chr17 | 57188044  | 57188044  | 6.1479E-01 | 1.22E-14 | 1.35E-12 | SKA2      |
| chr11 | 8941298   | 8941298   | 6.1457E-01 | 1.31E-14 | 1.44E-12 | AKIP1     |
| chr16 | 8947838   | 8947838   | 1.6432E+00 | 1.68E-14 | 1.84E-12 | CARHSP1   |
| chrX  | 24095334  | 24095334  | 7.5329E-01 | 1.72E-14 | 1.88E-12 | EIF2S3    |
| chr16 | 8947837   | 8947837   | 1.4543E+00 | 2.72E-14 | 2.95E-12 | CARHSP1   |
| chr14 | 75598977  | 75598977  | 1.0383E+00 | 2.77E-14 | 2.98E-12 | TMED10    |
| chr4  | 6718857   | 6718857   | 9.1022E-01 | 3.10E-14 | 3.32E-12 | BLOC1S4   |
| chr20 | 49577404  | 49577404  | 8.6524E-01 | 3.56E-14 | 3.79E-12 | MOCS3     |
| chr3  | 10143183  | 10143183  | 4.0059E-01 | 4.42E-14 | 4.69E-12 | FANCD2    |
| chr17 | 43002692  | 43002692  | 3.8914E-01 | 5.33E-14 | 5.63E-12 | KIF18B    |
| chrX  | 24095332  | 24095332  | 7.8969E-01 | 7.18E-14 | 7.53E-12 | EIF2S3    |
| chr8  | 22878109  | 22878109  | 7.9919E-01 | 7.43E-14 | 7.75E-12 | TNFRSF10B |
| chr17 | 43002708  | 43002708  | 4.9220E-01 | 1.10E-13 | 1.14E-11 | KIF18B    |
| chr11 | 6505438   | 6505438   | 5.9234E-01 | 1.17E-13 | 1.21E-11 | TIMM10B   |
| chr12 | 2997838   | 2997838   | 8.6330E-01 | 1.29E-13 | 1.32E-11 | RHNO1     |
| chr12 | 2997803   | 2997803   | 7.7257E-01 | 1.46E-13 | 1.49E-11 | RHNO1     |
| chr11 | 8941482   | 8941482   | 7.9981E-01 | 2.05E-13 | 2.08E-11 | AKIP1     |
| chr16 | 8947840   | 8947840   | 2.1851E+00 | 2.34E-13 | 2.36E-11 | CARHSP1   |
| chrX  | 24095241  | 24095241  | 2.7677E-01 | 2.63E-13 | 2.64E-11 | EIF2S3    |
| chrX  | 24095326  | 24095326  | 7.3304E-01 | 2.76E-13 | 2.76E-11 | EIF2S3    |
| chr7  | 56148068  | 56148068  | 1.5515E-01 | 2.82E-13 | 2.81E-11 | SUMF2     |
| chr20 | 49577412  | 49577412  | 6.2485E-01 | 3.18E-13 | 3.15E-11 | MOCS3     |
| chr17 | 57188045  | 57188045  | 5.4443E-01 | 3.30E-13 | 3.25E-11 | SKA2      |
| chr11 | 6505459   | 6505459   | 5.3604E-01 | 3.84E-13 | 3.76E-11 | TIMM10B   |
| chr17 | 38458760  | 38458760  | 3.7414E-01 | 4.03E-13 | 3.93E-11 | CDC6      |
| chr14 | 75598992  | 75598992  | 8.9817E-01 | 4.22E-13 | 4.09E-11 | TMED10    |

|       |           |           |             |          |          |          |
|-------|-----------|-----------|-------------|----------|----------|----------|
| chr4  | 6718856   | 6718856   | 8.1207E-01  | 4.60E-13 | 4.44E-11 | BLOC1S4  |
| chr20 | 49577400  | 49577400  | 7.0848E-01  | 4.64E-13 | 4.46E-11 | MOCS3    |
| chr4  | 6718848   | 6718848   | 7.1894E-01  | 4.76E-13 | 4.55E-11 | BLOC1S4  |
| chr1  | 3697444   | 3697444   | 7.5974E-01  | 4.86E-13 | 4.63E-11 | LRRC47   |
| chr4  | 6718847   | 6718847   | 8.1951E-01  | 5.08E-13 | 4.81E-11 | BLOC1S4  |
| chr5  | 174955061 | 174955061 | 1.5726E+00  | 6.52E-13 | 6.14E-11 | SFXN1    |
| chr4  | 6718851   | 6718851   | 6.2749E-01  | 7.09E-13 | 6.65E-11 | BLOC1S4  |
| chr19 | 17453217  | 17453217  | 7.0074E-01  | 7.22E-13 | 6.74E-11 | GTPBP3   |
| chr17 | 38458727  | 38458727  | 3.3511E-01  | 7.59E-13 | 7.05E-11 | CDC6     |
| chr4  | 6718843   | 6718843   | 8.2118E-01  | 7.68E-13 | 7.10E-11 | BLOC1S4  |
| chr20 | 49577425  | 49577425  | 9.6159E-01  | 7.88E-13 | 7.24E-11 | MOCS3    |
| chr11 | 65180591  | 65180591  | 6.1682E-01  | 8.27E-13 | 7.57E-11 | FRMD8    |
| chr17 | 29110536  | 29110536  | 9.8075E-01  | 8.79E-13 | 8.01E-11 | CRLF3    |
| chr3  | 33184301  | 33184301  | 1.9305E+00  | 9.15E-13 | 8.25E-11 | CRTAP    |
| chr12 | 2997825   | 2997825   | 8.6047E-01  | 9.11E-13 | 8.25E-11 | RHNO1    |
| chr4  | 6718835   | 6718835   | 7.7479E-01  | 9.72E-13 | 8.73E-11 | BLOC1S4  |
| chr7  | 56148067  | 56148067  | 1.5689E-01  | 1.28E-12 | 1.14E-10 | SUMF2    |
| chr20 | 49577401  | 49577401  | 6.5153E-01  | 1.32E-12 | 1.18E-10 | MOCS3    |
| chr16 | 8947820   | 8947820   | 8.3225E-01  | 1.97E-12 | 1.74E-10 | CARHSP1  |
| chr17 | 38458726  | 38458726  | 2.9363E-01  | 2.41E-12 | 2.11E-10 | CDC6     |
| chr1  | 3806153   | 3806153   | 7.4467E-01  | 2.41E-12 | 2.11E-10 | C1orf174 |
| chr12 | 2997796   | 2997796   | 8.2327E-01  | 2.89E-12 | 2.52E-10 | RHNO1    |
| chr20 | 49577421  | 49577421  | 1.0943E+00  | 4.41E-12 | 3.83E-10 | MOCS3    |
| chr7  | 56148066  | 56148066  | 2.0870E-01  | 4.63E-12 | 4.01E-10 | SUMF2    |
| chr1  | 21070455  | 21070455  | 7.4532E-01  | 4.66E-12 | 4.01E-10 | HP1BP3   |
| chr3  | 33184300  | 33184300  | 1.4973E+00  | 4.98E-12 | 4.28E-10 | CRTAP    |
| chr17 | 57188046  | 57188046  | 5.3409E-01  | 1.55E-11 | 1.32E-09 | SKA2     |
| chr9  | 116169961 | 116169961 | 7.7894E-01  | 1.59E-11 | 1.35E-09 | POLE3    |
| chr1  | 3697443   | 3697443   | 7.5383E-01  | 2.42E-11 | 2.05E-09 | LRRC47   |
| chr17 | 29110532  | 29110532  | 7.1724E-01  | 2.75E-11 | 2.31E-09 | CRLF3    |
| chr12 | 2997816   | 2997816   | 7.5825E-01  | 2.90E-11 | 2.44E-09 | RHNO1    |
| chr14 | 75598989  | 75598989  | 6.9765E-01  | 2.93E-11 | 2.45E-09 | TMED10   |
| chr1  | 3806154   | 3806154   | 7.4985E-01  | 4.76E-11 | 3.96E-09 | C1orf174 |
| chr14 | 93649246  | 93649246  | 6.2384E-01  | 5.15E-11 | 4.27E-09 | MOAP1    |
| chr16 | 8947844   | 8947844   | 1.7580E+00  | 5.23E-11 | 4.31E-09 | CARHSP1  |
| chr14 | 75598994  | 75598994  | 1.0310E+00  | 5.50E-11 | 4.52E-09 | TMED10   |
| chr4  | 6718861   | 6718861   | 1.0318E+00  | 6.74E-11 | 5.51E-09 | BLOC1S4  |
| chr14 | 75202667  | 75202667  | -3.9497E-01 | 7.26E-11 | 5.91E-09 | FCF1     |
| chr4  | 6718828   | 6718828   | 1.3762E+00  | 7.81E-11 | 6.34E-09 | BLOC1S4  |
| chr3  | 10143207  | 10143207  | 1.4568E+00  | 8.22E-11 | 6.64E-09 | FANCD2   |
| chr1  | 21070456  | 21070456  | 6.7180E-01  | 8.30E-11 | 6.68E-09 | HP1BP3   |

|       |           |           |            |          |          |           |
|-------|-----------|-----------|------------|----------|----------|-----------|
| chr13 | 38936678  | 38936678  | 5.7826E-01 | 8.35E-11 | 6.69E-09 | UFM1      |
| chr12 | 2997834   | 2997834   | 5.3953E-01 | 9.20E-11 | 7.28E-09 | RHNO1     |
| chr11 | 6505435   | 6505435   | 5.7068E-01 | 9.19E-11 | 7.28E-09 | TIMM10B   |
| chr1  | 3806156   | 3806156   | 5.4855E-01 | 9.14E-11 | 7.28E-09 | C1orf174  |
| chr8  | 104412027 | 104412027 | 2.1645E+00 | 1.04E-10 | 8.18E-09 | SLC25A32  |
| chr14 | 92630219  | 92630219  | 1.1074E+00 | 1.12E-10 | 8.78E-09 | CPSF2     |
| chr7  | 75045880  | 75045880  | 9.9658E-02 | 1.24E-10 | 9.70E-09 | NSUN5P1   |
| chr3  | 57306786  | 57306786  | 1.0689E+00 | 1.34E-10 | 1.05E-08 | APPL1     |
| chr19 | 34892837  | 34892837  | 3.1375E-01 | 1.53E-10 | 1.19E-08 | GPI       |
| chr11 | 8941338   | 8941338   | 9.8506E-01 | 1.80E-10 | 1.39E-08 | AKIP1     |
| chr4  | 6718850   | 6718850   | 6.8726E-01 | 1.95E-10 | 1.49E-08 | BLOC1S4   |
| chr11 | 8941344   | 8941344   | 7.4062E-01 | 1.95E-10 | 1.49E-08 | AKIP1     |
| chr11 | 8941226   | 8941226   | 7.7594E-01 | 2.16E-10 | 1.65E-08 | AKIP1     |
| chr1  | 3697511   | 3697511   | 1.0577E+00 | 2.44E-10 | 1.85E-08 | LRRC47    |
| chr14 | 75598995  | 75598995  | 1.0140E+00 | 2.92E-10 | 2.21E-08 | TMED10    |
| chr8  | 22878068  | 22878068  | 1.8171E+00 | 3.36E-10 | 2.54E-08 | TNFRSF10B |
| chr11 | 8941244   | 8941244   | 7.2282E-01 | 3.75E-10 | 2.82E-08 | AKIP1     |
| chr17 | 43002709  | 43002709  | 4.4750E-01 | 3.95E-10 | 2.95E-08 | KIF18B    |
| chr19 | 1038695   | 1038695   | 1.2840E+00 | 4.07E-10 | 3.04E-08 | CNN2      |
| chr16 | 8947806   | 8947806   | 1.5394E+00 | 4.52E-10 | 3.35E-08 | CARHSP1   |
| chr12 | 2997819   | 2997819   | 1.0807E+00 | 4.56E-10 | 3.37E-08 | RHNO1     |
| chr17 | 29110538  | 29110538  | 8.0326E-01 | 4.77E-10 | 3.52E-08 | CRLF3     |
| chr19 | 34892846  | 34892846  | 3.4805E-01 | 5.34E-10 | 3.92E-08 | GPI       |
| chr10 | 105885647 | 105885647 | 1.0588E+00 | 5.42E-10 | 3.96E-08 | SFR1      |
| chr3  | 57306759  | 57306759  | 6.5033E-01 | 6.78E-10 | 4.94E-08 | APPL1     |
| chr1  | 21070448  | 21070448  | 5.3416E-01 | 7.63E-10 | 5.54E-08 | HP1BP3    |
| chr19 | 1038689   | 1038689   | 1.1355E+00 | 7.91E-10 | 5.72E-08 | CNN2      |
| chr17 | 38458723  | 38458723  | 4.4781E-01 | 7.94E-10 | 5.72E-08 | CDC6      |
| chr13 | 38936662  | 38936662  | 6.8387E-01 | 1.01E-09 | 7.26E-08 | UFM1      |
| chr15 | 32930560  | 32930560  | 9.7010E-01 | 1.16E-09 | 8.29E-08 | ARHGAP11A |
| chr19 | 59093895  | 59093895  | 5.9434E-01 | 1.17E-09 | 8.31E-08 | CENPBD1P1 |
| chr17 | 29110539  | 29110539  | 6.8611E-01 | 1.35E-09 | 9.59E-08 | CRLF3     |
| chr17 | 38458761  | 38458761  | 3.3780E-01 | 1.37E-09 | 9.66E-08 | CDC6      |
| chr9  | 116169897 | 116169897 | 1.8370E+00 | 1.59E-09 | 1.12E-07 | POLE3     |
| chr8  | 22878072  | 22878072  | 1.4319E+00 | 1.59E-09 | 1.12E-07 | TNFRSF10B |
| chr19 | 59093877  | 59093877  | 5.8031E-01 | 1.61E-09 | 1.12E-07 | CENPBD1P1 |
| chr15 | 32930567  | 32930567  | 7.3684E-01 | 1.73E-09 | 1.21E-07 | ARHGAP11A |
| chr17 | 43002712  | 43002712  | 4.4378E-01 | 1.77E-09 | 1.23E-07 | KIF18B    |
| chr5  | 174955078 | 174955078 | 8.8526E-01 | 1.85E-09 | 1.28E-07 | SFXN1     |
| chr3  | 57306788  | 57306788  | 9.4439E-01 | 1.86E-09 | 1.28E-07 | APPL1     |
| chr19 | 59093891  | 59093891  | 5.8713E-01 | 1.94E-09 | 1.34E-07 | CENPBD1P1 |

|       |           |           |            |          |          |           |
|-------|-----------|-----------|------------|----------|----------|-----------|
| chr19 | 17453197  | 17453197  | 6.5845E-01 | 1.98E-09 | 1.36E-07 | GTPBP3    |
| chr19 | 17453221  | 17453221  | 5.6697E-01 | 2.13E-09 | 1.45E-07 | GTPBP3    |
| chr19 | 34892411  | 34892411  | 1.3110E+00 | 2.18E-09 | 1.48E-07 | GPI       |
| chr14 | 92630215  | 92630215  | 9.7801E-01 | 2.24E-09 | 1.51E-07 | CPSF2     |
| chr12 | 133298883 | 133298883 | 2.5953E-01 | 2.23E-09 | 1.51E-07 | PGAM5     |
| chr5  | 174955064 | 174955064 | 9.1512E-01 | 2.34E-09 | 1.57E-07 | SFXN1     |
| chr8  | 104412028 | 104412028 | 1.4290E+00 | 2.57E-09 | 1.72E-07 | SLC25A32  |
| chr13 | 38936660  | 38936660  | 7.9888E-01 | 2.75E-09 | 1.83E-07 | UFM1      |
| chr1  | 249144372 | 249144372 | 1.3141E-01 | 2.75E-09 | 1.83E-07 | ZNF692    |
| chr8  | 28048204  | 28048204  | 1.1533E+00 | 2.78E-09 | 1.84E-07 | ELP3      |
| chr17 | 43002688  | 43002688  | 3.9666E-01 | 2.78E-09 | 1.84E-07 | KIF18B    |
| chr8  | 104412030 | 104412030 | 1.4140E+00 | 2.86E-09 | 1.89E-07 | SLC25A32  |
| chr19 | 17453196  | 17453196  | 6.5291E-01 | 2.97E-09 | 1.95E-07 | GTPBP3    |
| chr11 | 8941342   | 8941342   | 7.6504E-01 | 3.39E-09 | 2.22E-07 | AKIP1     |
| chr7  | 56078949  | 56078949  | 1.0340E+00 | 3.41E-09 | 2.22E-07 | PSPH      |
| chr11 | 8941297   | 8941297   | 5.6155E-01 | 3.65E-09 | 2.38E-07 | AKIP1     |
| chr17 | 38458763  | 38458763  | 3.3737E-01 | 3.91E-09 | 2.54E-07 | CDC6      |
| chr4  | 166263624 | 166263624 | 5.2839E-01 | 4.30E-09 | 2.77E-07 | MSMO1     |
| chr15 | 32930561  | 32930561  | 7.2679E-01 | 4.29E-09 | 2.77E-07 | ARHGAP11A |
| chr11 | 8941225   | 8941225   | 8.1350E-01 | 4.55E-09 | 2.92E-07 | AKIP1     |
| chr4  | 6718833   | 6718833   | 4.8108E-01 | 4.82E-09 | 3.08E-07 | BLOC1S4   |
| chr3  | 20211767  | 20211767  | 4.2527E-01 | 5.34E-09 | 3.41E-07 | SGO1      |
| chrX  | 24095255  | 24095255  | 3.0513E-01 | 6.12E-09 | 3.89E-07 | EIF2S3    |
| chr12 | 2997792   | 2997792   | 8.2583E-01 | 6.82E-09 | 4.32E-07 | RHNO1     |
| chr3  | 33184291  | 33184291  | 7.3522E-01 | 7.02E-09 | 4.43E-07 | CRTAP     |
| chr17 | 43002713  | 43002713  | 4.4924E-01 | 7.17E-09 | 4.51E-07 | KIF18B    |
| chr11 | 8941343   | 8941343   | 6.8227E-01 | 7.43E-09 | 4.66E-07 | AKIP1     |
| chr19 | 34892384  | 34892384  | 1.5160E+00 | 7.71E-09 | 4.82E-07 | GPI       |
| chr19 | 1038693   | 1038693   | 1.1024E+00 | 7.78E-09 | 4.85E-07 | CNN2      |
| chr19 | 1038696   | 1038696   | 1.2392E+00 | 7.92E-09 | 4.92E-07 | CNN2      |
| chr15 | 32930557  | 32930557  | 6.2825E-01 | 8.50E-09 | 5.26E-07 | ARHGAP11A |
| chr5  | 174955080 | 174955080 | 7.1462E-01 | 8.74E-09 | 5.39E-07 | SFXN1     |
| chr10 | 124190697 | 124190697 | 1.7906E+00 | 8.80E-09 | 5.41E-07 | PLEKHA1   |
| chr19 | 34892834  | 34892834  | 2.8501E-01 | 9.13E-09 | 5.60E-07 | GPI       |
| chr17 | 38458758  | 38458758  | 3.5460E-01 | 9.23E-09 | 5.62E-07 | CDC6      |
| chr16 | 8947846   | 8947846   | 1.7174E+00 | 9.22E-09 | 5.62E-07 | CARHSP1   |
| chr3  | 57306784  | 57306784  | 8.3619E-01 | 9.69E-09 | 5.89E-07 | APPL1     |
| chrX  | 46741041  | 46741041  | 8.4968E-01 | 9.84E-09 | 5.96E-07 | RP2       |
| chr11 | 8941224   | 8941224   | 1.0194E+00 | 1.07E-08 | 6.47E-07 | AKIP1     |
| chr10 | 105885643 | 105885643 | 8.1299E-01 | 1.11E-08 | 6.69E-07 | SFR1      |
| chr5  | 174955077 | 174955077 | 6.0958E-01 | 1.13E-08 | 6.77E-07 | SFXN1     |



|       |           |           |             |          |          |           |
|-------|-----------|-----------|-------------|----------|----------|-----------|
| chr19 | 17453199  | 17453199  | 7.0479E-01  | 1.15E-08 | 6.88E-07 | GTPBP3    |
| chr17 | 29110529  | 29110529  | 5.8933E-01  | 1.17E-08 | 6.96E-07 | CRLF3     |
| chr4  | 6718860   | 6718860   | 7.8590E-01  | 1.22E-08 | 7.27E-07 | BLOC1S4   |
| chr8  | 28048201  | 28048201  | 1.1233E+00  | 1.26E-08 | 7.49E-07 | ELP3      |
| chr19 | 34892839  | 34892839  | 3.0247E-01  | 1.29E-08 | 7.61E-07 | GPI       |
| chr9  | 33046793  | 33046793  | 9.4114E-01  | 1.33E-08 | 7.84E-07 | SMU1      |
| chr19 | 34892838  | 34892838  | 2.8689E-01  | 1.38E-08 | 8.11E-07 | GPI       |
| chr20 | 49577397  | 49577397  | 6.0217E-01  | 1.44E-08 | 8.40E-07 | MOCS3     |
| chr3  | 57306787  | 57306787  | 8.2497E-01  | 1.46E-08 | 8.52E-07 | APPL1     |
| chr8  | 28048202  | 28048202  | 9.5293E-01  | 1.60E-08 | 9.32E-07 | ELP3      |
| chr1  | 3806162   | 3806162   | 6.1347E-01  | 1.66E-08 | 9.65E-07 | C1orf174  |
| chr17 | 29110530  | 29110530  | 6.3489E-01  | 1.73E-08 | 1.00E-06 | CRLF3     |
| chr8  | 28048213  | 28048213  | 6.5378E-01  | 1.94E-08 | 1.12E-06 | ELP3      |
| chr13 | 38936658  | 38936658  | 6.0899E-01  | 2.13E-08 | 1.22E-06 | UFM1      |
| chr1  | 3806157   | 3806157   | 3.7159E-01  | 2.12E-08 | 1.22E-06 | C1orf174  |
| chr10 | 105885644 | 105885644 | 1.0161E+00  | 2.22E-08 | 1.27E-06 | SFR1      |
| chr19 | 59093897  | 59093897  | 5.8435E-01  | 2.28E-08 | 1.30E-06 | CENPBD1P1 |
| chr19 | 1038692   | 1038692   | 9.4396E-01  | 2.38E-08 | 1.35E-06 | CNN2      |
| chr19 | 59093874  | 59093874  | 4.9988E-01  | 2.52E-08 | 1.43E-06 | CENPBD1P1 |
| chr4  | 4237888   | 4237888   | 1.8408E+00  | 2.61E-08 | 1.47E-06 | TMEM128   |
| chr8  | 104412019 | 104412019 | 8.5220E-01  | 2.71E-08 | 1.52E-06 | SLC25A32  |
| chr10 | 131978463 | 131978463 | Inf         | 2.85E-08 | 1.60E-06 | GLRX3     |
| chr15 | 32930558  | 32930558  | 6.1350E-01  | 3.07E-08 | 1.72E-06 | ARHGAP11A |
| chr11 | 8941337   | 8941337   | 7.7675E-01  | 3.26E-08 | 1.82E-06 | AKIP1     |
| chr7  | 56078952  | 56078952  | 6.2421E-01  | 3.28E-08 | 1.83E-06 | PSPH      |
| chr4  | 6718844   | 6718844   | 5.4839E-01  | 3.71E-08 | 2.06E-06 | BLOC1S4   |
| chr19 | 17453214  | 17453214  | 4.2998E-01  | 3.91E-08 | 2.16E-06 | GTPBP3    |
| chr14 | 75203062  | 75203062  | -3.2380E-01 | 3.93E-08 | 2.17E-06 | FCF1      |
| chr19 | 1038686   | 1038686   | 9.1719E-01  | 3.97E-08 | 2.18E-06 | CNN2      |
| chr15 | 32930527  | 32930527  | 5.2225E-01  | 4.52E-08 | 2.48E-06 | ARHGAP11A |
| chr4  | 4237886   | 4237886   | 1.3151E+00  | 4.65E-08 | 2.54E-06 | TMEM128   |
| chr3  | 33184307  | 33184307  | 1.4555E+00  | 4.91E-08 | 2.68E-06 | CRTAP     |
| chr10 | 124190683 | 124190683 | 1.6533E+00  | 5.03E-08 | 2.74E-06 | PLEKHA1   |
| chr17 | 43002701  | 43002701  | 5.0985E-01  | 5.61E-08 | 3.04E-06 | KIF18B    |
| chr14 | 93649232  | 93649232  | 6.9994E-01  | 5.65E-08 | 3.06E-06 | MOAP1     |
| chr10 | 105885655 | 105885655 | 6.6247E-01  | 6.14E-08 | 3.31E-06 | SFR1      |
| chr15 | 32930526  | 32930526  | 6.5718E-01  | 6.40E-08 | 3.44E-06 | ARHGAP11A |
| chr16 | 50070170  | 50070170  | 1.3976E+00  | 6.72E-08 | 3.60E-06 | CNEP1R1   |
| chr1  | 3806163   | 3806163   | 6.0703E-01  | 6.94E-08 | 3.71E-06 | C1orf174  |
| chr8  | 104411996 | 104411996 | 2.1305E+00  | 7.40E-08 | 3.95E-06 | SLC25A32  |
| chr13 | 38936675  | 38936675  | 3.6604E-01  | 8.77E-08 | 4.67E-06 | UFM1      |

|       |           |           |             |          |          |           |
|-------|-----------|-----------|-------------|----------|----------|-----------|
| chrX  | 24095237  | 24095237  | 2.5079E-01  | 9.13E-08 | 4.84E-06 | EIF2S3    |
| chr8  | 28048205  | 28048205  | 9.5983E-01  | 9.31E-08 | 4.93E-06 | ELP3      |
| chr19 | 59093896  | 59093896  | 5.1125E-01  | 9.49E-08 | 5.01E-06 | CENPBD1P1 |
| chr19 | 17453191  | 17453191  | 8.0187E-01  | 9.82E-08 | 5.17E-06 | GTPBP3    |
| chr15 | 32930529  | 32930529  | 6.4597E-01  | 1.03E-07 | 5.43E-06 | ARHGAP11A |
| chr19 | 17453193  | 17453193  | 6.2640E-01  | 1.10E-07 | 5.76E-06 | GTPBP3    |
| chr7  | 102277739 | 102277739 | 2.2369E-01  | 1.12E-07 | 5.84E-06 | POLR2J2   |
| chr19 | 34892415  | 34892415  | 9.1377E-01  | 1.17E-07 | 6.11E-06 | GPI       |
| chr3  | 33184303  | 33184303  | 8.4926E-01  | 1.25E-07 | 6.49E-06 | CRTAP     |
| chr16 | 8947807   | 8947807   | 7.7034E-01  | 1.25E-07 | 6.49E-06 | CARHSP1   |
| chr13 | 38936657  | 38936657  | 6.4317E-01  | 1.28E-07 | 6.63E-06 | UFM1      |
| chr9  | 116169900 | 116169900 | 1.9293E+00  | 1.30E-07 | 6.68E-06 | POLE3     |
| chr12 | 6875862   | 6875862   | 7.7658E-02  | 1.31E-07 | 6.74E-06 | PTMS      |
| chr11 | 46699398  | 46699398  | 4.3688E-01  | 1.35E-07 | 6.93E-06 | ARHGAP1   |
| chr19 | 1038687   | 1038687   | 1.0896E+00  | 1.38E-07 | 7.03E-06 | CNN2      |
| chr10 | 124190691 | 124190691 | 7.8217E-01  | 1.54E-07 | 7.86E-06 | PLEKHA1   |
| chr19 | 34892385  | 34892385  | 1.2044E+00  | 1.71E-07 | 8.67E-06 | GPI       |
| chr19 | 34892412  | 34892412  | 8.9667E-01  | 1.73E-07 | 8.78E-06 | GPI       |
| chr1  | 3806160   | 3806160   | 4.5639E-01  | 1.77E-07 | 8.94E-06 | C1orf174  |
| chr14 | 75203071  | 75203071  | -1.2950E-01 | 1.94E-07 | 9.76E-06 | FCF1      |
| chr15 | 32930563  | 32930563  | 7.0946E-01  | 1.95E-07 | 9.82E-06 | ARHGAP11A |
| chr1  | 3697426   | 3697426   | 8.9802E-01  | 2.02E-07 | 1.01E-05 | LRRC47    |
| chr20 | 49577431  | 49577431  | 8.2332E-01  | 2.05E-07 | 1.02E-05 | MOCS3     |
| chr1  | 21070459  | 21070459  | 8.8088E-01  | 2.06E-07 | 1.03E-05 | HP1BP3    |
| chr7  | 56079115  | 56079115  | 4.0349E-01  | 2.19E-07 | 1.09E-05 | PSPH      |
| chr3  | 33184298  | 33184298  | 8.7266E-01  | 2.29E-07 | 1.14E-05 | CRTAP     |
| chr17 | 38458721  | 38458721  | 4.5764E-01  | 2.38E-07 | 1.18E-05 | CDC6      |
| chr1  | 9788152   | 9788152   | 6.2177E-01  | 2.41E-07 | 1.19E-05 | PIK3CD    |
| chr3  | 33184306  | 33184306  | 9.9265E-01  | 2.46E-07 | 1.21E-05 | CRTAP     |
| chr11 | 27516909  | 27516909  | 1.2097E+00  | 2.60E-07 | 1.28E-05 | LIN7C     |
| chr9  | 123522786 | 123522786 | Inf         | 2.67E-07 | 1.31E-05 | FBXW2     |
| chr7  | 102277713 | 102277713 | 1.1834E+00  | 2.87E-07 | 1.40E-05 | POLR2J2   |
| chr13 | 38936682  | 38936682  | 3.5298E-01  | 2.89E-07 | 1.41E-05 | UFM1      |
| chr16 | 1495765   | 1495765   | 4.7642E-01  | 2.91E-07 | 1.41E-05 | CLCN7     |
| chr15 | 32930566  | 32930566  | 5.5676E-01  | 3.06E-07 | 1.49E-05 | ARHGAP11A |
| chr10 | 131978469 | 131978469 | 1.0662E+00  | 3.12E-07 | 1.51E-05 | GLRX3     |
| chr6  | 18130383  | 18130383  | 6.2176E-01  | 3.14E-07 | 1.52E-05 | TPMT      |
| chr8  | 28048196  | 28048196  | 1.1001E+00  | 3.21E-07 | 1.55E-05 | ELP3      |
| chr9  | 116169898 | 116169898 | 2.0394E+00  | 3.39E-07 | 1.63E-05 | POLE3     |
| chr8  | 22878069  | 22878069  | 1.2922E+00  | 3.51E-07 | 1.68E-05 | TNFRSF10B |
| chr7  | 138745319 | 138745319 | 1.5918E+00  | 3.59E-07 | 1.71E-05 | ZC3HAV1   |

|       |           |           |            |          |          |           |
|-------|-----------|-----------|------------|----------|----------|-----------|
| chr3  | 33184287  | 33184287  | 9.5773E-01 | 3.65E-07 | 1.74E-05 | CRTAP     |
| chr17 | 29110521  | 29110521  | 4.3550E-01 | 3.65E-07 | 1.74E-05 | CRLF3     |
| chr4  | 4237875   | 4237875   | 1.6437E+00 | 3.79E-07 | 1.80E-05 | TMEM128   |
| chr14 | 92630235  | 92630235  | 1.3544E+00 | 3.80E-07 | 1.80E-05 | CPSF2     |
| chr9  | 116169901 | 116169901 | 1.5876E+00 | 3.83E-07 | 1.81E-05 | POLE3     |
| chr4  | 4237889   | 4237889   | 1.0430E+00 | 3.98E-07 | 1.88E-05 | TMEM128   |
| chr16 | 29754168  | 29754168  | 1.2341E+00 | 4.07E-07 | 1.91E-05 | C16orf54  |
| chr19 | 34892421  | 34892421  | 1.0261E+00 | 4.09E-07 | 1.92E-05 | GPI       |
| chr19 | 59093890  | 59093890  | 4.2664E-01 | 4.21E-07 | 1.97E-05 | CENPBD1P1 |
| chr7  | 56079117  | 56079117  | 3.9826E-01 | 4.22E-07 | 1.97E-05 | PSPH      |
| chr19 | 59093888  | 59093888  | 4.9292E-01 | 4.44E-07 | 2.07E-05 | CENPBD1P1 |
| chr4  | 73922609  | 73922609  | 5.3557E-01 | 4.53E-07 | 2.10E-05 | COX18     |
| chr4  | 166263623 | 166263623 | 5.6992E-01 | 4.77E-07 | 2.21E-05 | MSMO1     |
| chr3  | 20211770  | 20211770  | 3.2805E-01 | 5.10E-07 | 2.36E-05 | SGO1      |
| chr11 | 6505433   | 6505433   | 7.4611E-01 | 5.40E-07 | 2.49E-05 | TIMM10B   |
| chr10 | 131978472 | 131978472 | 1.3114E+00 | 5.48E-07 | 2.52E-05 | GLRX3     |
| chr10 | 89619514  | 89619514  | 9.3459E-01 | 5.77E-07 | 2.65E-05 | KLLN      |
| chr15 | 32930531  | 32930531  | 4.1124E-01 | 5.90E-07 | 2.70E-05 | ARHGAP11A |
| chr19 | 34892372  | 34892372  | 2.6576E+00 | 5.92E-07 | 2.70E-05 | GPI       |
| chr7  | 56079108  | 56079108  | 3.3401E-01 | 5.95E-07 | 2.71E-05 | PSPH      |
| chr2  | 197000375 | 197000375 | 2.5264E+00 | 5.96E-07 | 2.71E-05 | STK17B    |
| chr17 | 29110546  | 29110546  | 2.2047E+00 | 6.04E-07 | 2.74E-05 | CRLF3     |
| chr19 | 1038683   | 1038683   | 1.2102E+00 | 6.60E-07 | 2.98E-05 | CNN2      |
| chr10 | 105885646 | 105885646 | 8.2485E-01 | 6.59E-07 | 2.98E-05 | SFR1      |
| chr15 | 32930565  | 32930565  | 4.4589E-01 | 6.63E-07 | 2.98E-05 | ARHGAP11A |
| chr19 | 34892417  | 34892417  | 8.9741E-01 | 6.82E-07 | 3.06E-05 | GPI       |
| chr3  | 57306752  | 57306752  | 4.2039E-01 | 6.93E-07 | 3.11E-05 | APPL1     |
| chr16 | 21191713  | 21191713  | 4.9310E-01 | 7.34E-07 | 3.28E-05 | TMEM159   |
| chr7  | 138745318 | 138745318 | 1.5901E+00 | 7.60E-07 | 3.39E-05 | ZC3HAV1   |
| chr13 | 38936692  | 38936692  | 5.8393E-01 | 7.74E-07 | 3.44E-05 | UFM1      |
| chr19 | 34892381  | 34892381  | 8.8393E-01 | 7.77E-07 | 3.45E-05 | GPI       |
| chr3  | 57306750  | 57306750  | 5.1382E-01 | 7.80E-07 | 3.45E-05 | APPL1     |
| chr6  | 18130382  | 18130382  | 5.3112E-01 | 8.05E-07 | 3.55E-05 | TPMT      |
| chr7  | 138745316 | 138745316 | 2.0363E+00 | 8.17E-07 | 3.60E-05 | ZC3HAV1   |
| chr3  | 20211783  | 20211783  | 3.8237E-01 | 8.48E-07 | 3.73E-05 | SGO1      |
| chr22 | 39128852  | 39128852  | 2.2582E+00 | 8.90E-07 | 3.90E-05 | GTPBP1    |
| chr22 | 39128838  | 39128838  | 1.6126E+00 | 9.24E-07 | 4.04E-05 | GTPBP1    |
| chrX  | 46741032  | 46741032  | 5.5682E-01 | 9.35E-07 | 4.08E-05 | RP2       |
| chr19 | 34892405  | 34892405  | 8.6852E-01 | 1.03E-06 | 4.49E-05 | GPI       |
| chr7  | 138745360 | 138745360 | Inf        | 1.13E-06 | 4.93E-05 | ZC3HAV1   |
| chr14 | 92630234  | 92630234  | 1.1981E+00 | 1.15E-06 | 4.98E-05 | CPSF2     |

|       |           |           |            |          |          |             |
|-------|-----------|-----------|------------|----------|----------|-------------|
| chr16 | 29754182  | 29754182  | 1.9375E+00 | 1.16E-06 | 5.00E-05 | C16orf54    |
| chr8  | 104412013 | 104412013 | 8.3388E-01 | 1.19E-06 | 5.15E-05 | SLC25A32    |
| chr19 | 34892835  | 34892835  | 2.8753E-01 | 1.21E-06 | 5.23E-05 | GPI         |
| chr10 | 131978476 | 131978476 | 1.3031E+00 | 1.28E-06 | 5.52E-05 | GLRX3       |
| chr4  | 6718862   | 6718862   | 1.4342E+00 | 1.34E-06 | 5.73E-05 | BLOC1S4     |
| chr10 | 131978475 | 131978475 | 1.0515E+00 | 1.36E-06 | 5.80E-05 | GLRX3       |
| chr7  | 56079120  | 56079120  | 3.6217E-01 | 1.37E-06 | 5.83E-05 | PSPH        |
| chr11 | 65180579  | 65180579  | 5.0045E-01 | 1.39E-06 | 5.91E-05 | FRMD8       |
| chr15 | 41573181  | 41573181  | 6.8632E-01 | 1.40E-06 | 5.96E-05 | CHP1        |
| chr5  | 10435945  | 10435945  | Inf        | 1.42E-06 | 6.02E-05 | MARCH6      |
| chr16 | 3022796   | 3022796   | 1.7886E-01 | 1.46E-06 | 6.16E-05 | PAQR4       |
| chr1  | 21070457  | 21070457  | 8.1015E-01 | 1.55E-06 | 6.53E-05 | HP1BP3      |
| chr19 | 34892377  | 34892377  | 8.7030E-01 | 1.56E-06 | 6.55E-05 | GPI         |
| chr19 | 36032254  | 36032254  | 1.1273E+00 | 1.56E-06 | 6.55E-05 | TMEM147-AS1 |
| chr16 | 21191708  | 21191708  | 3.9000E-01 | 1.57E-06 | 6.56E-05 | TMEM159     |
| chr16 | 29754166  | 29754166  | 1.2623E+00 | 1.60E-06 | 6.71E-05 | C16orf54    |
| chr10 | 131978462 | 131978462 | 1.6727E+00 | 1.63E-06 | 6.80E-05 | GLRX3       |
| chr10 | 89619516  | 89619516  | 7.4539E-01 | 1.63E-06 | 6.80E-05 | KLLN        |
| chr11 | 27516908  | 27516908  | 9.6070E-01 | 1.81E-06 | 7.52E-05 | LIN7C       |
| chr17 | 29110543  | 29110543  | 1.0010E+00 | 1.82E-06 | 7.54E-05 | CRLF3       |
| chr2  | 202151470 | 202151470 | 4.8846E-01 | 1.83E-06 | 7.55E-05 | CASP8       |
| chr16 | 21191717  | 21191717  | 1.7058E+00 | 1.87E-06 | 7.71E-05 | TMEM159     |
| chr8  | 28048195  | 28048195  | 6.9374E-01 | 1.89E-06 | 7.74E-05 | ELP3        |
| chr7  | 56079099  | 56079099  | 4.4291E-01 | 1.89E-06 | 7.75E-05 | PSPH        |
| chr11 | 46699395  | 46699395  | 6.0288E-01 | 1.95E-06 | 7.98E-05 | ARHGAP1     |
| chr12 | 56215547  | 56215547  | 1.7624E+00 | 1.96E-06 | 8.02E-05 | DNAJC14     |
| chr7  | 102277715 | 102277715 | 7.5841E-01 | 2.00E-06 | 8.15E-05 | POLR2J2     |
| chr11 | 46699397  | 46699397  | 5.4600E-01 | 2.10E-06 | 8.53E-05 | ARHGAP1     |
| chr19 | 59093887  | 59093887  | 4.3900E-01 | 2.30E-06 | 9.34E-05 | CENPBD1P1   |
| chr16 | 21191704  | 21191704  | 3.7032E-01 | 2.34E-06 | 9.47E-05 | TMEM159     |
| chr20 | 49577395  | 49577395  | 5.1213E-01 | 2.35E-06 | 9.51E-05 | MOCS3       |
| chr11 | 66034954  | 66034954  | 2.1855E-01 | 2.40E-06 | 9.69E-05 | KLC2        |
| chr20 | 49577435  | 49577435  | 7.1979E-01 | 2.41E-06 | 9.71E-05 | MOCS3       |
| chr11 | 27516901  | 27516901  | 1.2085E+00 | 2.47E-06 | 9.93E-05 | LIN7C       |
| chr22 | 24937475  | 24937475  | 4.3032E-01 | 2.49E-06 | 9.99E-05 | GUCD1       |
| chr10 | 105885648 | 105885648 | 4.8075E-01 | 2.51E-06 | 1.00E-04 | SFR1        |
| chrX  | 46407030  | 46407030  | 5.8332E-01 | 2.52E-06 | 1.00E-04 | ZNF674-AS1  |
| chr14 | 93649250  | 93649250  | 5.5544E-01 | 2.58E-06 | 1.03E-04 | MOAP1       |
| chr12 | 56215535  | 56215535  | 1.1232E+00 | 2.59E-06 | 1.03E-04 | DNAJC14     |
| chr16 | 29754172  | 29754172  | 1.2962E+00 | 2.73E-06 | 1.08E-04 | C16orf54    |
| chr8  | 22878066  | 22878066  | 2.0724E+00 | 2.77E-06 | 1.10E-04 | TNFRSF10B   |

|       |           |           |             |          |          |            |
|-------|-----------|-----------|-------------|----------|----------|------------|
| chr3  | 57306751  | 57306751  | 4.1366E-01  | 2.83E-06 | 1.11E-04 | APPL1      |
| chr17 | 59943595  | 59943595  | 1.2826E+00  | 2.82E-06 | 1.11E-04 | INTS2      |
| chr15 | 41573176  | 41573176  | 6.0711E-01  | 2.83E-06 | 1.11E-04 | CHP1       |
| chr11 | 46699394  | 46699394  | 4.8800E-01  | 2.88E-06 | 1.13E-04 | ARHGAP1    |
| chr9  | 135251165 | 135251165 | -5.5141E-01 | 2.94E-06 | 1.15E-04 | TTF1       |
| chr16 | 50070173  | 50070173  | 1.0139E+00  | 2.95E-06 | 1.15E-04 | CNEP1R1    |
| chr15 | 41573177  | 41573177  | 6.8409E-01  | 3.02E-06 | 1.18E-04 | CHP1       |
| chr22 | 24937490  | 24937490  | 1.2476E+00  | 3.13E-06 | 1.22E-04 | GUCD1      |
| chr20 | 49577394  | 49577394  | 5.6995E-01  | 3.29E-06 | 1.28E-04 | MOCS3      |
| chr22 | 39128824  | 39128824  | 2.5002E+00  | 3.42E-06 | 1.33E-04 | GTPBP1     |
| chr15 | 41573170  | 41573170  | 7.4883E-01  | 3.47E-06 | 1.34E-04 | CHP1       |
| chr3  | 33184310  | 33184310  | 1.0804E+00  | 3.53E-06 | 1.36E-04 | CRTAP      |
| chr12 | 72179802  | 72179802  | 4.0826E-01  | 3.54E-06 | 1.36E-04 | RAB21      |
| chr11 | 8941324   | 8941324   | 7.0495E-01  | 3.56E-06 | 1.37E-04 | AKIP1      |
| chr7  | 56078951  | 56078951  | 2.6962E-01  | 3.77E-06 | 1.45E-04 | PSPH       |
| chrX  | 46741030  | 46741030  | 4.6038E-01  | 3.86E-06 | 1.48E-04 | RP2        |
| chr19 | 59093893  | 59093893  | 5.2844E-01  | 3.87E-06 | 1.48E-04 | CENPBD1P1  |
| chr8  | 104412000 | 104412000 | 1.0752E+00  | 3.94E-06 | 1.50E-04 | SLC25A32   |
| chr12 | 57648150  | 57648150  | 2.1692E+00  | 3.94E-06 | 1.50E-04 | R3HDM2     |
| chr3  | 156258127 | 156258127 | 7.3603E-01  | 4.01E-06 | 1.52E-04 | SSR3       |
| chr12 | 56215548  | 56215548  | 1.7551E+00  | 4.07E-06 | 1.54E-04 | DNAJC14    |
| chr16 | 29754179  | 29754179  | 1.2751E+00  | 4.16E-06 | 1.57E-04 | C16orf54   |
| chr19 | 59093856  | 59093856  | 5.4939E-01  | 4.41E-06 | 1.67E-04 | CENPBD1P1  |
| chrX  | 46407051  | 46407051  | 1.1597E+00  | 4.45E-06 | 1.68E-04 | ZNF674-AS1 |
| chr11 | 65542157  | 65542157  | 2.1863E+00  | 4.45E-06 | 1.68E-04 | AP5B1      |
| chr3  | 57306748  | 57306748  | 4.1519E-01  | 4.49E-06 | 1.69E-04 | APPL1      |
| chr11 | 27516912  | 27516912  | 9.6032E-01  | 4.54E-06 | 1.70E-04 | LIN7C      |
| chrX  | 24095339  | 24095339  | 6.9796E-01  | 4.57E-06 | 1.71E-04 | EIF2S3     |
| chr20 | 49577434  | 49577434  | 7.0930E-01  | 4.56E-06 | 1.71E-04 | MOCS3      |
| chr11 | 27516916  | 27516916  | 9.6029E-01  | 4.58E-06 | 1.71E-04 | LIN7C      |
| chr19 | 59093857  | 59093857  | 5.4257E-01  | 4.67E-06 | 1.74E-04 | CENPBD1P1  |
| chr10 | 105885683 | 105885683 | 6.2668E-01  | 4.67E-06 | 1.74E-04 | SFR1       |
| chr1  | 28662098  | 28662098  | 1.3820E-01  | 4.95E-06 | 1.83E-04 | MED18      |
| chr16 | 29754174  | 29754174  | 1.2717E+00  | 5.16E-06 | 1.91E-04 | C16orf54   |
| chr20 | 35280696  | 35280696  | 4.8020E-01  | 5.25E-06 | 1.94E-04 | NDRG3      |
| chr16 | 29754165  | 29754165  | 1.2677E+00  | 5.38E-06 | 1.98E-04 | C16orf54   |
| chr11 | 490937    | 490937    | 5.5601E-01  | 5.51E-06 | 2.03E-04 | PTDSS2     |
| chr19 | 17453044  | 17453044  | 4.2392E-01  | 5.63E-06 | 2.07E-04 | GTPBP3     |
| chr12 | 109887425 | 109887425 | 1.0550E+00  | 5.64E-06 | 2.07E-04 | KCTD10     |
| chr1  | 204392462 | 204392462 | 5.0746E-01  | 5.66E-06 | 2.07E-04 | PIK3C2B    |
| chr14 | 92630229  | 92630229  | 7.6676E-01  | 5.68E-06 | 2.07E-04 | CPSF2      |

|       |           |           |             |          |          |             |
|-------|-----------|-----------|-------------|----------|----------|-------------|
| chr13 | 38936686  | 38936686  | 4.9884E-01  | 5.71E-06 | 2.08E-04 | UFM1        |
| chr19 | 36032253  | 36032253  | 1.1141E+00  | 5.82E-06 | 2.12E-04 | TMEM147-AS1 |
| chr7  | 56079179  | 56079179  | 4.2516E-01  | 5.88E-06 | 2.13E-04 | PSPH        |
| chr14 | 75202665  | 75202665  | -1.3003E-01 | 5.90E-06 | 2.14E-04 | FCF1        |
| chr7  | 72419023  | 72419023  | 1.7887E-01  | 5.98E-06 | 2.16E-04 | NSUN5P2     |
| chr19 | 34892380  | 34892380  | 7.5136E-01  | 6.11E-06 | 2.20E-04 | GPI         |
| chr19 | 1038682   | 1038682   | 1.0910E+00  | 6.12E-06 | 2.21E-04 | CNN2        |
| chr10 | 131978470 | 131978470 | 1.2748E+00  | 6.20E-06 | 2.23E-04 | GLRX3       |
| chr4  | 83551853  | 83551853  | 1.0415E+00  | 6.40E-06 | 2.29E-04 | SCD5        |
| chr11 | 6505432   | 6505432   | 7.7997E-01  | 6.39E-06 | 2.29E-04 | TIMM10B     |
| chr20 | 35280693  | 35280693  | 4.1754E-01  | 6.55E-06 | 2.34E-04 | NDRG3       |
| chr1  | 9788154   | 9788154   | 5.9333E-01  | 6.66E-06 | 2.38E-04 | PIK3CD      |
| chr12 | 56215538  | 56215538  | 8.0282E-01  | 6.88E-06 | 2.45E-04 | DNAJC14     |
| chr10 | 105885638 | 105885638 | 9.5628E-01  | 6.91E-06 | 2.46E-04 | SFR1        |
| chr22 | 24937492  | 24937492  | 5.7854E-01  | 7.05E-06 | 2.50E-04 | GUCD1       |
| chr16 | 21191705  | 21191705  | 4.0102E-01  | 7.32E-06 | 2.59E-04 | TMEM159     |
| chr13 | 38936694  | 38936694  | 5.6825E-01  | 7.46E-06 | 2.64E-04 | UFM1        |
| chr8  | 77894942  | 77894942  | 2.4199E+00  | 7.89E-06 | 2.78E-04 | PEX2        |
| chr2  | 197000365 | 197000365 | 1.8563E+00  | 7.89E-06 | 2.78E-04 | STK17B      |
| chr12 | 72179806  | 72179806  | 4.0376E-01  | 7.88E-06 | 2.78E-04 | RAB21       |
| chr20 | 35280702  | 35280702  | 3.5594E-01  | 8.22E-06 | 2.88E-04 | NDRG3       |
| chr14 | 92630206  | 92630206  | 5.0435E-01  | 8.22E-06 | 2.88E-04 | CPSF2       |
| chr19 | 36032255  | 36032255  | 1.4836E+00  | 8.55E-06 | 2.99E-04 | TMEM147-AS1 |
| chr12 | 109887417 | 109887417 | 8.4644E-01  | 8.67E-06 | 3.02E-04 | KCTD10      |
| chr8  | 22878071  | 22878071  | 1.5056E+00  | 8.76E-06 | 3.05E-04 | TNFRSF10B   |
| chr1  | 100757990 | 100757990 | 2.7317E-01  | 8.90E-06 | 3.09E-04 | RTCA        |
| chr15 | 41573179  | 41573179  | 7.4722E-01  | 8.97E-06 | 3.11E-04 | CHP1        |
| chr20 | 39802812  | 39802812  | 3.6757E-01  | 1.00E-05 | 3.47E-04 | PLCG1       |
| chr19 | 34892414  | 34892414  | 7.2085E-01  | 1.01E-05 | 3.48E-04 | GPI         |
| chr1  | 115312912 | 115312912 | 8.4199E-01  | 1.01E-05 | 3.48E-04 | SIKE1       |
| chr16 | 2508384   | 2508384   | 2.6961E-01  | 1.01E-05 | 3.48E-04 | CCNF        |
| chr7  | 102277741 | 102277741 | 2.1971E-01  | 1.02E-05 | 3.51E-04 | POLR2J2     |
| chr6  | 18130379  | 18130379  | 5.4141E-01  | 1.04E-05 | 3.57E-04 | TPMT        |
| chr15 | 41573180  | 41573180  | 6.1024E-01  | 1.05E-05 | 3.59E-04 | CHP1        |
| chr1  | 23833903  | 23833903  | 2.3014E+00  | 1.06E-05 | 3.63E-04 | E2F2        |
| chr1  | 204392469 | 204392469 | 7.1351E-01  | 1.08E-05 | 3.68E-04 | PIK3C2B     |
| chr8  | 77894939  | 77894939  | 2.3612E+00  | 1.10E-05 | 3.72E-04 | PEX2        |
| chr17 | 43002716  | 43002716  | 4.2502E-01  | 1.10E-05 | 3.72E-04 | KIF18B      |
| chr16 | 21191714  | 21191714  | 3.5901E-01  | 1.10E-05 | 3.72E-04 | TMEM159     |
| chr11 | 27516910  | 27516910  | 1.1778E+00  | 1.10E-05 | 3.72E-04 | LIN7C       |
| chr1  | 3806136   | 3806136   | 1.5331E+00  | 1.10E-05 | 3.73E-04 | C1orf174    |

|       |           |           |             |          |          |              |
|-------|-----------|-----------|-------------|----------|----------|--------------|
| chr14 | 92630231  | 92630231  | 6.4845E-01  | 1.11E-05 | 3.75E-04 | CPSF2        |
| chr15 | 32930530  | 32930530  | 4.3157E-01  | 1.11E-05 | 3.75E-04 | ARHGAP11A    |
| chrX  | 46741033  | 46741033  | 4.5246E-01  | 1.15E-05 | 3.87E-04 | RP2          |
| chr10 | 131978466 | 131978466 | 1.6450E+00  | 1.15E-05 | 3.87E-04 | GLRX3        |
| chr12 | 107391384 | 107391384 | 1.1858E-01  | 1.16E-05 | 3.89E-04 | CRY1         |
| chr8  | 104412006 | 104412006 | 6.9360E-01  | 1.19E-05 | 4.00E-04 | SLC25A32     |
| chr3  | 20211784  | 20211784  | 3.3735E-01  | 1.20E-05 | 4.02E-04 | SGO1         |
| chr22 | 24937508  | 24937508  | 1.0188E+00  | 1.26E-05 | 4.19E-04 | GUCD1        |
| chr4  | 1193082   | 1193082   | 1.8292E+00  | 1.27E-05 | 4.22E-04 | LOC100130872 |
| chr19 | 59093881  | 59093881  | 4.4445E-01  | 1.29E-05 | 4.27E-04 | CENPBD1P1    |
| chr13 | 38936688  | 38936688  | 4.1575E-01  | 1.30E-05 | 4.32E-04 | UFM1         |
| chr3  | 156258119 | 156258119 | 6.7023E-01  | 1.34E-05 | 4.43E-04 | SSR3         |
| chr15 | 41573173  | 41573173  | 7.3386E-01  | 1.38E-05 | 4.55E-04 | CHP1         |
| chr1  | 179832247 | 179832247 | 4.1092E-01  | 1.39E-05 | 4.60E-04 | TOR1AIP2     |
| chr17 | 38458720  | 38458720  | 5.3164E-01  | 1.40E-05 | 4.60E-04 | CDC6         |
| chr4  | 1813580   | 1813580   | 7.7920E-01  | 1.41E-05 | 4.63E-04 | LETM1        |
| chr17 | 29110545  | 29110545  | 9.5791E-01  | 1.44E-05 | 4.72E-04 | CRLF3        |
| chr10 | 855695    | 855695    | 4.2075E-01  | 1.47E-05 | 4.82E-04 | LARP4B       |
| chr10 | 105885684 | 105885684 | 9.2306E-01  | 1.59E-05 | 5.20E-04 | SFR1         |
| chr8  | 77894938  | 77894938  | 2.3500E+00  | 1.61E-05 | 5.25E-04 | PEX2         |
| chr9  | 116169885 | 116169885 | 2.2112E+00  | 1.61E-05 | 5.26E-04 | POLE3        |
| chrX  | 46407033  | 46407033  | 5.8298E-01  | 1.66E-05 | 5.38E-04 | ZNF674-AS1   |
| chr4  | 4237890   | 4237890   | 9.9357E-01  | 1.66E-05 | 5.38E-04 | TMEM128      |
| chr20 | 49577432  | 49577432  | 5.5309E-01  | 1.65E-05 | 5.38E-04 | MOCS3        |
| chr8  | 104411999 | 104411999 | 7.1400E-01  | 1.67E-05 | 5.43E-04 | SLC25A32     |
| chr2  | 61412650  | 61412650  | 4.9689E-01  | 1.89E-05 | 6.13E-04 | AHSA2        |
| chr12 | 72179813  | 72179813  | 4.0694E-01  | 1.95E-05 | 6.28E-04 | RAB21        |
| chr12 | 72179805  | 72179805  | 3.5709E-01  | 1.96E-05 | 6.30E-04 | RAB21        |
| chrX  | 46741029  | 46741029  | 3.3162E-01  | 1.99E-05 | 6.39E-04 | RP2          |
| chr4  | 83551916  | 83551916  | 2.2405E+00  | 2.05E-05 | 6.55E-04 | SCD5         |
| chr22 | 24937491  | 24937491  | 7.7287E-01  | 2.04E-05 | 6.55E-04 | GUCD1        |
| chr17 | 59943587  | 59943587  | 8.9185E-01  | 2.12E-05 | 6.78E-04 | INTS2        |
| chr20 | 49577429  | 49577429  | 8.7745E-01  | 2.13E-05 | 6.79E-04 | MOCS3        |
| chr7  | 56079102  | 56079102  | 3.3346E-01  | 2.17E-05 | 6.91E-04 | PSPH         |
| chr1  | 100757979 | 100757979 | 3.1845E-01  | 2.19E-05 | 6.97E-04 | RTCA         |
| chr1  | 100757982 | 100757982 | 3.1751E-01  | 2.19E-05 | 6.97E-04 | RTCA         |
| chr17 | 43002541  | 43002541  | 6.3479E-01  | 2.21E-05 | 7.02E-04 | KIF18B       |
| chr16 | 75600303  | 75600303  | 9.7821E-01  | 2.23E-05 | 7.07E-04 | GABARAPL2    |
| chr7  | 2703820   | 2703820   | -6.0809E-02 | 2.24E-05 | 7.08E-04 | TTYH3        |
| chr8  | 22878082  | 22878082  | 1.2709E+00  | 2.27E-05 | 7.17E-04 | TNFRSF10B    |
| chr3  | 57306791  | 57306791  | 1.0614E+00  | 2.30E-05 | 7.23E-04 | APPL1        |

|       |           |           |             |          |          |             |
|-------|-----------|-----------|-------------|----------|----------|-------------|
| chr9  | 116169916 | 116169916 | 2.5393E+00  | 2.33E-05 | 7.34E-04 | POLE3       |
| chr7  | 138745310 | 138745310 | 1.3590E+00  | 2.36E-05 | 7.40E-04 | ZC3HAV1     |
| chr8  | 77894946  | 77894946  | 2.3658E+00  | 2.38E-05 | 7.43E-04 | PEX2        |
| chr7  | 102277738 | 102277738 | 2.1441E-01  | 2.37E-05 | 7.43E-04 | POLR2J2     |
| chr2  | 120978199 | 120978199 | 7.2154E-01  | 2.39E-05 | 7.47E-04 | TMEM185B    |
| chr17 | 57188048  | 57188048  | 7.9787E-01  | 2.46E-05 | 7.67E-04 | SKA2        |
| chr17 | 20904240  | 20904240  | 5.5968E-01  | 2.49E-05 | 7.76E-04 | USP22       |
| chr16 | 29754175  | 29754175  | 9.1555E-01  | 2.52E-05 | 7.84E-04 | C16orf54    |
| chr12 | 56215536  | 56215536  | 7.9106E-01  | 2.55E-05 | 7.92E-04 | DNAJC14     |
| chr12 | 109887426 | 109887426 | 1.0506E+00  | 2.56E-05 | 7.93E-04 | KCTD10      |
| chr9  | 116169884 | 116169884 | 2.6749E+00  | 2.57E-05 | 7.94E-04 | POLE3       |
| chr16 | 29754177  | 29754177  | 9.0072E-01  | 2.57E-05 | 7.94E-04 | C16orf54    |
| chr15 | 32930570  | 32930570  | 5.3588E-01  | 2.58E-05 | 7.95E-04 | ARHGAP11A   |
| chr1  | 3729126   | 3729126   | 3.3846E-01  | 2.59E-05 | 7.96E-04 | CEP104      |
| chr22 | 24937462  | 24937462  | 5.6212E-01  | 2.62E-05 | 8.05E-04 | GUCD1       |
| chr12 | 56215549  | 56215549  | 1.7026E+00  | 2.63E-05 | 8.08E-04 | DNAJC14     |
| chr2  | 197000397 | 197000397 | 1.5757E+00  | 2.65E-05 | 8.11E-04 | STK17B      |
| chr20 | 35280710  | 35280710  | 2.4773E-01  | 2.66E-05 | 8.15E-04 | NDRG3       |
| chr6  | 18130385  | 18130385  | 5.2585E-01  | 2.78E-05 | 8.51E-04 | TPMT        |
| chr4  | 83551852  | 83551852  | 6.4680E-01  | 2.79E-05 | 8.51E-04 | SCD5        |
| chr16 | 21191707  | 21191707  | 2.8910E-01  | 2.83E-05 | 8.63E-04 | TMEM159     |
| chr17 | 43002787  | 43002787  | 5.4159E-01  | 2.93E-05 | 8.92E-04 | KIF18B      |
| chr17 | 43002545  | 43002545  | 6.3329E-01  | 3.05E-05 | 9.26E-04 | KIF18B      |
| chr11 | 27516913  | 27516913  | 6.5404E-01  | 3.13E-05 | 9.49E-04 | LIN7C       |
| chr1  | 26160972  | 26160972  | 9.9919E-01  | 3.15E-05 | 9.54E-04 | AUNIP       |
| chr13 | 38936691  | 38936691  | 3.7581E-01  | 3.16E-05 | 9.54E-04 | UFM1        |
| chr9  | 132572112 | 132572112 | 1.1527E+00  | 3.18E-05 | 9.57E-04 | TOR1B       |
| chr7  | 92166478  | 92166478  | -2.9215E-01 | 3.17E-05 | 9.57E-04 | RBM48       |
| chr3  | 57306747  | 57306747  | 2.5254E-01  | 3.18E-05 | 9.57E-04 | APPL1       |
| chr22 | 39128841  | 39128841  | 1.5674E+00  | 3.20E-05 | 9.59E-04 | GTPBP1      |
| chr10 | 105885687 | 105885687 | 1.3084E+00  | 3.23E-05 | 9.68E-04 | SFR1        |
| chr7  | 138745311 | 138745311 | 2.0471E+00  | 3.28E-05 | 9.80E-04 | ZC3HAV1     |
| chr19 | 11433654  | 11433654  | Inf         | 3.29E-05 | 9.80E-04 | RAB3D       |
| chr16 | 21191712  | 21191712  | 3.8536E-01  | 3.29E-05 | 9.80E-04 | TMEM159     |
| chr2  | 202151393 | 202151393 | 5.0270E-01  | 3.31E-05 | 9.86E-04 | CASP8       |
| chr11 | 65180583  | 65180583  | 6.5284E-01  | 3.33E-05 | 9.89E-04 | FRMD8       |
| chr22 | 24937493  | 24937493  | 6.9009E-01  | 3.43E-05 | 1.02E-03 | GUCD1       |
| chr2  | 202151462 | 202151462 | 3.9434E-01  | 3.50E-05 | 1.04E-03 | CASP8       |
| chr19 | 36032246  | 36032246  | 9.0430E-01  | 3.50E-05 | 1.04E-03 | TMEM147-AS1 |
| chr1  | 26161006  | 26161006  | 1.6211E+00  | 3.51E-05 | 1.04E-03 | AUNIP       |
| chr4  | 4237914   | 4237914   | 2.4314E+00  | 3.57E-05 | 1.05E-03 | TMEM128     |



|       |           |           |            |          |          |             |
|-------|-----------|-----------|------------|----------|----------|-------------|
| chr19 | 11433649  | 11433649  | Inf        | 3.61E-05 | 1.06E-03 | RAB3D       |
| chr4  | 83551856  | 83551856  | 8.1797E-01 | 3.81E-05 | 1.12E-03 | SCD5        |
| chrX  | 46741026  | 46741026  | 3.8067E-01 | 3.87E-05 | 1.13E-03 | RP2         |
| chr19 | 17453190  | 17453190  | 5.7391E-01 | 3.94E-05 | 1.15E-03 | GTPBP3      |
| chr19 | 36032257  | 36032257  | 1.1118E+00 | 3.94E-05 | 1.15E-03 | TMEM147-AS1 |
| chr16 | 29754178  | 29754178  | 1.2651E+00 | 3.95E-05 | 1.15E-03 | C16orf54    |
| chr10 | 124190677 | 124190677 | 2.3001E+00 | 3.94E-05 | 1.15E-03 | PLEKHA1     |
| chr8  | 104411994 | 104411994 | 6.7818E-01 | 4.06E-05 | 1.18E-03 | SLC25A32    |
| chr16 | 8947912   | 8947912   | 9.4355E-01 | 4.12E-05 | 1.20E-03 | CARHSP1     |
| chr12 | 56215539  | 56215539  | 6.2183E-01 | 4.19E-05 | 1.22E-03 | DNAJC14     |
| chr5  | 174955178 | 174955178 | 1.4552E+00 | 4.25E-05 | 1.23E-03 | SFXN1       |
| chr1  | 23833902  | 23833902  | 1.5068E+00 | 4.27E-05 | 1.24E-03 | E2F2        |
| chr8  | 28048133  | 28048133  | 5.7055E-01 | 4.30E-05 | 1.24E-03 | ELP3        |
| chr1  | 23833866  | 23833866  | 1.9474E+00 | 4.31E-05 | 1.24E-03 | E2F2        |
| chr19 | 34892420  | 34892420  | 7.1298E-01 | 4.33E-05 | 1.25E-03 | GPI         |
| chr3  | 156258126 | 156258126 | 6.4906E-01 | 4.42E-05 | 1.27E-03 | SSR3        |
| chr9  | 33045729  | 33045729  | Inf        | 4.45E-05 | 1.28E-03 | SMU1        |
| chr15 | 32930521  | 32930521  | 4.3764E-01 | 4.46E-05 | 1.28E-03 | ARHGAP11A   |
| chr12 | 109887428 | 109887428 | 9.9786E-01 | 4.51E-05 | 1.29E-03 | KCTD10      |
| chr10 | 124190679 | 124190679 | 1.1907E+00 | 4.53E-05 | 1.29E-03 | PLEKHA1     |
| chr1  | 100757983 | 100757983 | 3.1034E-01 | 4.69E-05 | 1.34E-03 | RTCA        |
| chrX  | 46407059  | 46407059  | 1.1372E+00 | 4.81E-05 | 1.37E-03 | ZNF674-AS1  |
| chr17 | 59943589  | 59943589  | 6.7198E-01 | 4.88E-05 | 1.38E-03 | INTS2       |
| chr12 | 109887424 | 109887424 | 1.0450E+00 | 4.94E-05 | 1.40E-03 | KCTD10      |
| chr4  | 83551854  | 83551854  | 8.1357E-01 | 4.97E-05 | 1.41E-03 | SCD5        |
| chr1  | 23833894  | 23833894  | 1.5210E+00 | 5.18E-05 | 1.46E-03 | E2F2        |
| chr10 | 89619504  | 89619504  | 2.1332E+00 | 5.19E-05 | 1.47E-03 | KLLN        |
| chr4  | 83551845  | 83551845  | 6.2426E-01 | 5.20E-05 | 1.47E-03 | SCD5        |
| chr16 | 87426015  | 87426015  | 2.0587E+00 | 5.34E-05 | 1.50E-03 | MAP1LC3B    |
| chr1  | 28661805  | 28661805  | 8.5046E-02 | 5.34E-05 | 1.50E-03 | MED18       |
| chr17 | 43002543  | 43002543  | 5.8336E-01 | 5.39E-05 | 1.51E-03 | KIF18B      |
| chr19 | 11433651  | 11433651  | Inf        | 5.55E-05 | 1.56E-03 | RAB3D       |
| chr2  | 202151463 | 202151463 | 3.5078E-01 | 5.62E-05 | 1.57E-03 | CASP8       |
| chr7  | 56079193  | 56079193  | 2.3507E-01 | 5.70E-05 | 1.59E-03 | PSPH        |
| chr10 | 105885678 | 105885678 | 6.4969E-01 | 5.80E-05 | 1.62E-03 | SFR1        |
| chr22 | 30093675  | 30093675  | 6.9868E-01 | 5.83E-05 | 1.62E-03 | NF2         |
| chr12 | 72179804  | 72179804  | 3.5058E-01 | 5.92E-05 | 1.65E-03 | RAB21       |
| chr17 | 5393310   | 5393310   | 8.1763E-01 | 5.94E-05 | 1.65E-03 | MIS12       |
| chr3  | 155480837 | 155480837 | 6.2473E-01 | 5.96E-05 | 1.65E-03 | C3orf33     |
| chr4  | 4237915   | 4237915   | 1.8049E+00 | 5.98E-05 | 1.66E-03 | TMEM128     |
| chr4  | 1813584   | 1813584   | 7.7212E-01 | 6.02E-05 | 1.67E-03 | LETM1       |

|       |           |           |            |          |          |           |
|-------|-----------|-----------|------------|----------|----------|-----------|
| chr16 | 75600300  | 75600300  | 8.9418E-01 | 6.03E-05 | 1.67E-03 | GABARAPL2 |
| chr19 | 34892401  | 34892401  | 1.2700E+00 | 6.10E-05 | 1.68E-03 | GPI       |
| chr12 | 56390381  | 56390381  | 1.8403E+00 | 6.12E-05 | 1.68E-03 | RAB5B     |
| chr1  | 26161002  | 26161002  | 1.6104E+00 | 6.12E-05 | 1.68E-03 | AUNIP     |
| chr17 | 43002542  | 43002542  | 5.8988E-01 | 6.29E-05 | 1.73E-03 | KIF18B    |
| chr11 | 65180576  | 65180576  | 5.4775E-01 | 6.49E-05 | 1.78E-03 | FRMD8     |
| chr10 | 131978410 | 131978410 | 2.0227E+00 | 6.51E-05 | 1.78E-03 | GLRX3     |
| chr7  | 56079095  | 56079095  | 5.0262E-01 | 6.56E-05 | 1.79E-03 | PSPH      |
| chr16 | 50070190  | 50070190  | 6.6345E-01 | 6.60E-05 | 1.80E-03 | CNEP1R1   |
| chr11 | 46699401  | 46699401  | 4.0364E-01 | 6.73E-05 | 1.83E-03 | ARHGAP1   |
| chr7  | 138745353 | 138745353 | 2.0129E+00 | 6.81E-05 | 1.85E-03 | ZC3HAV1   |
| chr5  | 10435980  | 10435980  | 2.3627E+00 | 6.95E-05 | 1.89E-03 | MARCH6    |
| chr17 | 5393313   | 5393313   | 8.1444E-01 | 7.13E-05 | 1.93E-03 | MIS12     |
| chr6  | 20102075  | 20102075  | 1.9570E+00 | 7.17E-05 | 1.94E-03 | MBOAT1    |
| chr16 | 50070187  | 50070187  | 5.4564E-01 | 7.26E-05 | 1.96E-03 | CNEP1R1   |
| chr20 | 57486142  | 57486142  | 1.4886E+00 | 7.39E-05 | 1.99E-03 | GNAS      |
| chr17 | 38458757  | 38458757  | 3.7597E-01 | 7.48E-05 | 2.01E-03 | CDC6      |
| chr11 | 27516888  | 27516888  | 1.1657E+00 | 7.57E-05 | 2.04E-03 | LIN7C     |
| chr4  | 83551857  | 83551857  | 7.8566E-01 | 7.61E-05 | 2.04E-03 | SCD5      |
| chr1  | 23833911  | 23833911  | 2.1708E+00 | 7.67E-05 | 2.06E-03 | E2F2      |
| chr15 | 41573171  | 41573171  | 5.2685E-01 | 7.76E-05 | 2.08E-03 | CHP1      |
| chr10 | 89619511  | 89619511  | 5.4238E-01 | 7.79E-05 | 2.08E-03 | KLLN      |
| chr22 | 24937507  | 24937507  | 1.1798E+00 | 7.83E-05 | 2.09E-03 | GUCD1     |
| chr5  | 10435942  | 10435942  | Inf        | 8.00E-05 | 2.13E-03 | MARCH6    |
| chr1  | 204392471 | 204392471 | 6.1414E-01 | 8.21E-05 | 2.18E-03 | PIK3C2B   |
| chr20 | 35280714  | 35280714  | 2.3866E-01 | 8.23E-05 | 2.19E-03 | NDRG3     |
| chr1  | 115312913 | 115312913 | 8.0154E-01 | 8.40E-05 | 2.23E-03 | SIKE1     |
| chr4  | 159630579 | 159630579 | 9.3030E-01 | 8.43E-05 | 2.23E-03 | PPID      |
| chr2  | 202151459 | 202151459 | 3.9992E-01 | 8.62E-05 | 2.27E-03 | CASP8     |
| chr10 | 131978487 | 131978487 | 1.2215E+00 | 8.74E-05 | 2.30E-03 | GLRX3     |
| chr3  | 141664015 | 141664015 | 1.3461E-01 | 8.76E-05 | 2.30E-03 | TFDP2     |
| chr14 | 92630228  | 92630228  | 5.6528E-01 | 8.78E-05 | 2.30E-03 | CPSF2     |
| chr22 | 39128821  | 39128821  | 1.2829E+00 | 8.84E-05 | 2.31E-03 | GTPBP1    |
| chr14 | 92630191  | 92630191  | 7.1548E-01 | 8.85E-05 | 2.31E-03 | CPSF2     |
| chr7  | 56079119  | 56079119  | 2.8532E-01 | 8.92E-05 | 2.33E-03 | PSPH      |
| chr22 | 39128855  | 39128855  | 1.1813E+00 | 9.01E-05 | 2.35E-03 | GTPBP1    |
| chr1  | 26160975  | 26160975  | 9.6362E-01 | 9.02E-05 | 2.35E-03 | AUNIP     |
| chr4  | 1381024   | 1381024   | 2.2286E+00 | 9.14E-05 | 2.38E-03 | UVSSA     |
| chr8  | 22878063  | 22878063  | 1.8753E+00 | 9.28E-05 | 2.41E-03 | TNFRSF10B |
| chr1  | 3806023   | 3806023   | 1.0894E+00 | 9.27E-05 | 2.41E-03 | C1orf174  |
| chr9  | 33045720  | 33045720  | 2.5039E+00 | 9.60E-05 | 2.48E-03 | SMU1      |

|       |           |           |             |          |          |            |
|-------|-----------|-----------|-------------|----------|----------|------------|
| chr10 | 105885682 | 105885682 | 5.8661E-01  | 9.59E-05 | 2.48E-03 | SFR1       |
| chr1  | 23833905  | 23833905  | 2.2558E+00  | 9.58E-05 | 2.48E-03 | E2F2       |
| chr17 | 59943598  | 59943598  | 1.0527E+00  | 9.71E-05 | 2.50E-03 | INTS2      |
| chr16 | 87426006  | 87426006  | Inf         | 9.74E-05 | 2.51E-03 | MAP1LC3B   |
| chr20 | 35280713  | 35280713  | 2.4051E-01  | 9.87E-05 | 2.53E-03 | NDRG3      |
| chr16 | 29754181  | 29754181  | 8.5521E-01  | 1.00E-04 | 2.57E-03 | C16orf54   |
| chr4  | 664183    | 664183    | -1.5102E+00 | 1.02E-04 | 2.60E-03 | PDE6B      |
| chr22 | 24937501  | 24937501  | 6.7449E-01  | 1.02E-04 | 2.61E-03 | GUCD1      |
| chr19 | 34892831  | 34892831  | 2.8645E-01  | 1.02E-04 | 2.61E-03 | GPI        |
| chr19 | 37002422  | 37002422  | 1.1122E+00  | 1.03E-04 | 2.62E-03 | ZNF260     |
| chr11 | 27516892  | 27516892  | 5.6141E-01  | 1.03E-04 | 2.63E-03 | LIN7C      |
| chr10 | 105885674 | 105885674 | 7.1654E-01  | 1.03E-04 | 2.63E-03 | SFR1       |
| chr11 | 65180582  | 65180582  | 6.0951E-01  | 1.05E-04 | 2.65E-03 | FRMD8      |
| chr11 | 27516919  | 27516919  | 9.1689E-01  | 1.05E-04 | 2.65E-03 | LIN7C      |
| chrX  | 46407035  | 46407035  | 4.7467E-01  | 1.05E-04 | 2.67E-03 | ZNF674-AS1 |
| chr22 | 36623223  | 36623223  | 5.4719E-01  | 1.08E-04 | 2.72E-03 | APOL2      |
| chr4  | 1381016   | 1381016   | 2.2631E+00  | 1.09E-04 | 2.74E-03 | UVSSA      |
| chr12 | 2997740   | 2997740   | 7.0103E-01  | 1.10E-04 | 2.77E-03 | RHNO1      |
| chr22 | 24937500  | 24937500  | 6.0443E-01  | 1.11E-04 | 2.78E-03 | GUCD1      |
| chr16 | 2508375   | 2508375   | 2.7852E-01  | 1.13E-04 | 2.84E-03 | CCNF       |
| chr19 | 48984892  | 48984892  | 1.0289E+00  | 1.15E-04 | 2.88E-03 | CYTH2      |
| chr16 | 8947916   | 8947916   | 1.3633E+00  | 1.15E-04 | 2.89E-03 | CARHSP1    |
| chr14 | 92630188  | 92630188  | 5.0259E-01  | 1.16E-04 | 2.91E-03 | CPSF2      |
| chr4  | 6718827   | 6718827   | 7.9212E-01  | 1.17E-04 | 2.93E-03 | BLOC1S4    |
| chr19 | 11433652  | 11433652  | Inf         | 1.17E-04 | 2.93E-03 | RAB3D      |
| chr12 | 57648181  | 57648181  | 6.5482E-01  | 1.17E-04 | 2.93E-03 | R3HDM2     |
| chr12 | 57648147  | 57648147  | 2.1198E+00  | 1.19E-04 | 2.98E-03 | R3HDM2     |
| chr8  | 77894948  | 77894948  | 2.3494E+00  | 1.21E-04 | 3.00E-03 | PEX2       |
| chr19 | 11433647  | 11433647  | Inf         | 1.22E-04 | 3.02E-03 | RAB3D      |
| chr8  | 77894949  | 77894949  | 2.2902E+00  | 1.22E-04 | 3.04E-03 | PEX2       |
| chr7  | 2703814   | 2703814   | -4.4413E-02 | 1.24E-04 | 3.06E-03 | TTYH3      |
| chr1  | 204373511 | 204373511 | 1.0265E-01  | 1.25E-04 | 3.09E-03 | PPP1R15B   |
| chrX  | 24095236  | 24095236  | 2.1628E-01  | 1.25E-04 | 3.10E-03 | EIF2S3     |
| chr19 | 48984894  | 48984894  | 9.4767E-01  | 1.31E-04 | 3.23E-03 | CYTH2      |
| chr12 | 56390382  | 56390382  | 1.8271E+00  | 1.31E-04 | 3.23E-03 | RAB5B      |
| chr19 | 1038671   | 1038671   | 1.4626E+00  | 1.34E-04 | 3.31E-03 | CNN2       |
| chrX  | 46407031  | 46407031  | 4.6556E-01  | 1.35E-04 | 3.32E-03 | ZNF674-AS1 |
| chr8  | 77894940  | 77894940  | 1.5750E+00  | 1.36E-04 | 3.35E-03 | PEX2       |
| chr10 | 89619517  | 89619517  | 5.9563E-01  | 1.36E-04 | 3.35E-03 | KLLN       |
| chr16 | 50070169  | 50070169  | 9.6794E-01  | 1.37E-04 | 3.36E-03 | CNEP1R1    |
| chr7  | 138745356 | 138745356 | Inf         | 1.37E-04 | 3.36E-03 | ZC3HAV1    |

|       |           |           |             |          |          |            |
|-------|-----------|-----------|-------------|----------|----------|------------|
| chr7  | 154795375 | 154795375 | 3.4809E-01  | 1.38E-04 | 3.38E-03 | PAXIP1-AS1 |
| chr12 | 56390376  | 56390376  | 1.1386E+00  | 1.41E-04 | 3.45E-03 | RAB5B      |
| chr16 | 75478247  | 75478247  | 6.4526E-01  | 1.42E-04 | 3.47E-03 | TMEM170A   |
| chr16 | 29754164  | 29754164  | 1.2218E+00  | 1.42E-04 | 3.47E-03 | C16orf54   |
| chr7  | 2703813   | 2703813   | -4.7754E-02 | 1.44E-04 | 3.49E-03 | TTYH3      |
| chr14 | 75202689  | 75202689  | -5.9410E-01 | 1.44E-04 | 3.49E-03 | FCF1       |
| chr4  | 73922610  | 73922610  | 4.9394E-01  | 1.45E-04 | 3.52E-03 | COX18      |
| chr12 | 44181630  | 44181630  | 3.7280E-01  | 1.45E-04 | 3.52E-03 | IRAK4      |
| chr14 | 92630197  | 92630197  | 9.0722E-01  | 1.46E-04 | 3.52E-03 | CPSF2      |
| chr4  | 4237921   | 4237921   | 2.8200E+00  | 1.48E-04 | 3.56E-03 | TMEM128    |
| chr1  | 204373507 | 204373507 | 8.8536E-02  | 1.48E-04 | 3.56E-03 | PPP1R15B   |
| chr10 | 89619513  | 89619513  | 6.1566E-01  | 1.48E-04 | 3.56E-03 | KLLN       |
| chr7  | 102277742 | 102277742 | 1.9485E-01  | 1.50E-04 | 3.62E-03 | POLR2J2    |
| chr5  | 174954969 | 174954969 | 3.6731E-01  | 1.51E-04 | 3.62E-03 | SFXN1      |
| chr4  | 73922598  | 73922598  | 2.8856E-01  | 1.51E-04 | 3.62E-03 | COX18      |
| chr14 | 92630199  | 92630199  | 7.3229E-01  | 1.52E-04 | 3.64E-03 | CPSF2      |
| chr15 | 41573168  | 41573168  | 7.0601E-01  | 1.54E-04 | 3.68E-03 | CHP1       |
| chr1  | 26161012  | 26161012  | 1.6297E+00  | 1.54E-04 | 3.68E-03 | AUNIP      |
| chrX  | 46407027  | 46407027  | 5.5795E-01  | 1.55E-04 | 3.69E-03 | ZNF674-AS1 |
| chr12 | 56215518  | 56215518  | 1.1843E+00  | 1.55E-04 | 3.69E-03 | DNAJC14    |
| chr6  | 18130380  | 18130380  | 2.6539E-01  | 1.58E-04 | 3.76E-03 | TPMT       |
| chr12 | 44181624  | 44181624  | 3.7110E-01  | 1.59E-04 | 3.79E-03 | IRAK4      |
| chr1  | 3806132   | 3806132   | 8.8274E-01  | 1.60E-04 | 3.81E-03 | C1orf174   |
| chr10 | 131978479 | 131978479 | 1.6055E+00  | 1.62E-04 | 3.84E-03 | GLRX3      |
| chr1  | 38490374  | 38490374  | 1.0491E+00  | 1.63E-04 | 3.86E-03 | UTP11      |
| chr19 | 48984889  | 48984889  | 7.5051E-01  | 1.64E-04 | 3.89E-03 | CYTH2      |
| chr1  | 158299328 | 158299328 | 3.8843E-01  | 1.65E-04 | 3.90E-03 | CD1B       |
| chr20 | 49577437  | 49577437  | 8.6929E-01  | 1.66E-04 | 3.92E-03 | MOCS3      |
| chr8  | 104412010 | 104412010 | 4.1198E-01  | 1.71E-04 | 4.04E-03 | SLC25A32   |
| chr19 | 34892829  | 34892829  | 4.6464E-01  | 1.73E-04 | 4.07E-03 | GPI        |
| chr16 | 66977845  | 66977845  | -2.1346E+00 | 1.73E-04 | 4.08E-03 | CES2       |
| chr1  | 9788149   | 9788149   | 4.2052E-01  | 1.75E-04 | 4.12E-03 | PIK3CD     |
| chr5  | 36183528  | 36183528  | 1.1114E+00  | 1.76E-04 | 4.12E-03 | SKP2       |
| chr1  | 38490367  | 38490367  | 1.1122E+00  | 1.76E-04 | 4.12E-03 | UTP11      |
| chr14 | 92630189  | 92630189  | 4.6245E-01  | 1.78E-04 | 4.17E-03 | CPSF2      |
| chr19 | 34892852  | 34892852  | 4.7129E-01  | 1.79E-04 | 4.18E-03 | GPI        |
| chr15 | 41573167  | 41573167  | 6.3355E-01  | 1.79E-04 | 4.18E-03 | CHP1       |
| chr22 | 36623226  | 36623226  | 4.8184E-01  | 1.80E-04 | 4.20E-03 | APOL2      |
| chr1  | 26160981  | 26160981  | 6.6968E-01  | 1.82E-04 | 4.23E-03 | AUNIP      |
| chr16 | 75600306  | 75600306  | 6.5556E-01  | 1.82E-04 | 4.23E-03 | GABARAPL2  |
| chr1  | 26160974  | 26160974  | 6.7986E-01  | 1.84E-04 | 4.27E-03 | AUNIP      |

|       |           |           |             |          |          |             |
|-------|-----------|-----------|-------------|----------|----------|-------------|
| chr6  | 18130377  | 18130377  | 4.4914E-01  | 1.84E-04 | 4.27E-03 | TPMT        |
| chr10 | 105885664 | 105885664 | 5.2551E-01  | 1.86E-04 | 4.31E-03 | SFR1        |
| chr11 | 65180580  | 65180580  | 5.9620E-01  | 1.91E-04 | 4.41E-03 | FRMD8       |
| chr4  | 73922611  | 73922611  | 7.8350E-01  | 1.93E-04 | 4.44E-03 | COX18       |
| chr1  | 26161003  | 26161003  | 1.5949E+00  | 1.94E-04 | 4.46E-03 | AUNIP       |
| chr5  | 10435949  | 10435949  | 1.1686E+00  | 1.95E-04 | 4.49E-03 | MARCH6      |
| chr3  | 48955492  | 48955492  | 1.5866E+00  | 1.96E-04 | 4.49E-03 | ARIH2OS     |
| chr19 | 34892828  | 34892828  | 4.6038E-01  | 1.96E-04 | 4.49E-03 | GPI         |
| chr22 | 24937504  | 24937504  | 5.8769E-01  | 1.99E-04 | 4.55E-03 | GUCD1       |
| chr17 | 76203484  | 76203484  | 6.0336E-01  | 2.00E-04 | 4.59E-03 | AFMID       |
| chr11 | 27516918  | 27516918  | 7.4493E-01  | 2.02E-04 | 4.62E-03 | LIN7C       |
| chr11 | 6505365   | 6505365   | 7.8524E-01  | 2.06E-04 | 4.70E-03 | TIMM10B     |
| chr13 | 38936689  | 38936689  | 3.5286E-01  | 2.12E-04 | 4.83E-03 | UFM1        |
| chr17 | 43002551  | 43002551  | 3.2270E-01  | 2.12E-04 | 4.83E-03 | KIF18B      |
| chr3  | 156258121 | 156258121 | 6.1811E-01  | 2.12E-04 | 4.83E-03 | SSR3        |
| chr1  | 26160977  | 26160977  | 9.5678E-01  | 2.13E-04 | 4.83E-03 | AUNIP       |
| chr16 | 8947917   | 8947917   | 1.6454E+00  | 2.16E-04 | 4.89E-03 | CARHSP1     |
| chr11 | 747455    | 747455    | 1.7391E+00  | 2.16E-04 | 4.90E-03 | TALDO1      |
| chr6  | 28090891  | 28090891  | 1.8325E+00  | 2.17E-04 | 4.91E-03 | ZSCAN16-AS1 |
| chr11 | 214977    | 214977    | Inf         | 2.18E-04 | 4.92E-03 | RIC8A       |
| chr22 | 30093680  | 30093680  | 6.7696E-01  | 2.19E-04 | 4.93E-03 | NF2         |
| chr3  | 57306781  | 57306781  | 5.9386E-01  | 2.20E-04 | 4.95E-03 | APPL1       |
| chr3  | 141664024 | 141664024 | 1.7412E-01  | 2.20E-04 | 4.95E-03 | TFDP2       |
| chr1  | 26160971  | 26160971  | 9.7893E-01  | 2.21E-04 | 4.96E-03 | AUNIP       |
| chr9  | 139622572 | 139622572 | 1.2426E+00  | 2.21E-04 | 4.96E-03 | SNHG7       |
| chr12 | 7085779   | 7085779   | 8.5316E-01  | 2.25E-04 | 5.04E-03 | LPCAT3      |
| chr4  | 1813581   | 1813581   | 5.4365E-01  | 2.26E-04 | 5.06E-03 | LETM1       |
| chr17 | 76203502  | 76203502  | 6.2899E-01  | 2.27E-04 | 5.06E-03 | AFMID       |
| chr11 | 65542158  | 65542158  | 1.0293E+00  | 2.27E-04 | 5.07E-03 | AP5B1       |
| chr3  | 155480808 | 155480808 | 2.0903E+00  | 2.28E-04 | 5.08E-03 | C3orf33     |
| chr17 | 76203509  | 76203509  | 5.3533E-01  | 2.32E-04 | 5.17E-03 | AFMID       |
| chr5  | 140050159 | 140050159 | #NAME?      | 2.37E-04 | 5.26E-03 | WDR55       |
| chr12 | 109887429 | 109887429 | 7.6822E-01  | 2.37E-04 | 5.26E-03 | KCTD10      |
| chr16 | 2508376   | 2508376   | 2.8195E-01  | 2.39E-04 | 5.29E-03 | CCNF        |
| chr1  | 26160966  | 26160966  | 1.5558E+00  | 2.39E-04 | 5.29E-03 | AUNIP       |
| chr1  | 26160967  | 26160967  | 1.5558E+00  | 2.39E-04 | 5.29E-03 | AUNIP       |
| chr19 | 1038680   | 1038680   | 1.1736E+00  | 2.41E-04 | 5.32E-03 | CNN2        |
| chr8  | 77894943  | 77894943  | 1.5660E+00  | 2.42E-04 | 5.35E-03 | PEX2        |
| chr9  | 135251188 | 135251188 | -2.4216E-01 | 2.44E-04 | 5.37E-03 | TTF1        |
| chr9  | 123522777 | 123522777 | 8.0544E-01  | 2.47E-04 | 5.43E-03 | FBXW2       |
| chr17 | 5393303   | 5393303   | 8.0831E-01  | 2.48E-04 | 5.45E-03 | MIS12       |

|       |           |           |             |          |          |            |
|-------|-----------|-----------|-------------|----------|----------|------------|
| chr1  | 220232118 | 220232118 | 9.3118E-02  | 2.49E-04 | 5.48E-03 | BPNT1      |
| chr3  | 20211785  | 20211785  | 2.4345E-01  | 2.50E-04 | 5.48E-03 | SGO1       |
| chr3  | 57546193  | 57546193  | 1.8267E+00  | 2.52E-04 | 5.52E-03 | PDE12      |
| chr20 | 35280709  | 35280709  | 2.1326E-01  | 2.54E-04 | 5.54E-03 | NDRG3      |
| chr2  | 202151458 | 202151458 | 3.6483E-01  | 2.53E-04 | 5.54E-03 | CASP8      |
| chr16 | 50139149  | 50139149  | 1.4519E-01  | 2.54E-04 | 5.54E-03 | HEATR3     |
| chr4  | 77080741  | 77080741  | Inf         | 2.57E-04 | 5.60E-03 | SCARB2     |
| chr16 | 50139150  | 50139150  | 1.7966E-01  | 2.60E-04 | 5.65E-03 | HEATR3     |
| chr19 | 37002417  | 37002417  | 7.3464E-01  | 2.60E-04 | 5.65E-03 | ZNF260     |
| chr9  | 116169947 | 116169947 | 6.8618E-01  | 2.63E-04 | 5.71E-03 | POLE3      |
| chr10 | 131978458 | 131978458 | 2.3435E+00  | 2.64E-04 | 5.72E-03 | GLRX3      |
| chr19 | 59093900  | 59093900  | 4.9039E-01  | 2.66E-04 | 5.76E-03 | CENPBD1P1  |
| chr7  | 138745359 | 138745359 | Inf         | 2.68E-04 | 5.79E-03 | ZC3HAV1    |
| chr1  | 115312933 | 115312933 | 7.3355E-01  | 2.68E-04 | 5.79E-03 | SIKE1      |
| chr11 | 72540472  | 72540472  | 1.2637E-01  | 2.69E-04 | 5.79E-03 | ATG16L2    |
| chrX  | 46407034  | 46407034  | 4.0044E-01  | 2.72E-04 | 5.86E-03 | ZNF674-AS1 |
| chr12 | 44181625  | 44181625  | 3.8650E-01  | 2.77E-04 | 5.96E-03 | IRAK4      |
| chr12 | 56390373  | 56390373  | 1.8124E+00  | 2.77E-04 | 5.96E-03 | RAB5B      |
| chr1  | 9788151   | 9788151   | 3.9839E-01  | 2.81E-04 | 6.03E-03 | PIK3CD     |
| chr3  | 57306674  | 57306674  | 3.8856E-01  | 2.83E-04 | 6.06E-03 | APPL1      |
| chr16 | 29754192  | 29754192  | Inf         | 2.82E-04 | 6.06E-03 | C16orf54   |
| chr11 | 65542164  | 65542164  | 1.0674E+00  | 2.84E-04 | 6.08E-03 | AP5B1      |
| chr2  | 197000366 | 197000366 | 1.1166E+00  | 2.87E-04 | 6.14E-03 | STK17B     |
| chr14 | 92630225  | 92630225  | 7.5007E-01  | 2.89E-04 | 6.18E-03 | CPSF2      |
| chr20 | 43995819  | 43995819  | 7.8532E-01  | 2.91E-04 | 6.20E-03 | SYS1       |
| chr1  | 3697447   | 3697447   | 7.2533E-01  | 2.91E-04 | 6.21E-03 | LRRC47     |
| chr11 | 46699404  | 46699404  | 4.6181E-01  | 2.92E-04 | 6.21E-03 | ARHGAP1    |
| chr8  | 28048147  | 28048147  | 9.1629E-01  | 2.94E-04 | 6.24E-03 | ELP3       |
| chr16 | 50139165  | 50139165  | 2.7493E-01  | 2.94E-04 | 6.25E-03 | HEATR3     |
| chr19 | 21907824  | 21907824  | 4.7008E-01  | 2.95E-04 | 6.26E-03 | ZNF100     |
| chr1  | 28661808  | 28661808  | 6.3463E-02  | 2.97E-04 | 6.29E-03 | MED18      |
| chr12 | 133298956 | 133298956 | 2.2005E-01  | 2.97E-04 | 6.30E-03 | PGAM5      |
| chr7  | 2703743   | 2703743   | -4.9509E-02 | 2.99E-04 | 6.31E-03 | TTYH3      |
| chr14 | 92630226  | 92630226  | 8.4239E-01  | 2.98E-04 | 6.31E-03 | CPSF2      |
| chr4  | 1813586   | 1813586   | 5.5904E-01  | 3.02E-04 | 6.38E-03 | LETM1      |
| chr14 | 92630185  | 92630185  | 6.9468E-01  | 3.06E-04 | 6.45E-03 | CPSF2      |
| chr4  | 1813587   | 1813587   | 5.8039E-01  | 3.08E-04 | 6.47E-03 | LETM1      |
| chr1  | 204373506 | 204373506 | 8.3121E-02  | 3.07E-04 | 6.47E-03 | PPP1R15B   |
| chr17 | 5393297   | 5393297   | 7.9513E-01  | 3.10E-04 | 6.52E-03 | MIS12      |
| chr15 | 41573166  | 41573166  | 6.8802E-01  | 3.12E-04 | 6.54E-03 | CHP1       |
| chr15 | 32930523  | 32930523  | 3.3621E-01  | 3.15E-04 | 6.61E-03 | ARHGAP11A  |

|       |           |           |             |          |          |             |
|-------|-----------|-----------|-------------|----------|----------|-------------|
| chr11 | 65542145  | 65542145  | 2.1111E+00  | 3.20E-04 | 6.68E-03 | AP5B1       |
| chr1  | 204392470 | 204392470 | 4.7176E-01  | 3.20E-04 | 6.68E-03 | PIK3C2B     |
| chr9  | 123522770 | 123522770 | 8.9035E-01  | 3.24E-04 | 6.77E-03 | FBXW2       |
| chr16 | 29818417  | 29818417  | 3.6336E-02  | 3.33E-04 | 6.95E-03 | MAZ         |
| chr9  | 116169917 | 116169917 | 1.7980E+00  | 3.34E-04 | 6.96E-03 | POLE3       |
| chr16 | 29818427  | 29818427  | 6.3386E-02  | 3.38E-04 | 7.03E-03 | MAZ         |
| chr10 | 105885640 | 105885640 | 4.7853E-01  | 3.38E-04 | 7.03E-03 | SFR1        |
| chr2  | 120978203 | 120978203 | 5.4202E-01  | 3.41E-04 | 7.07E-03 | TMEM185B    |
| chr3  | 141464950 | 141464950 | 3.5354E-01  | 3.51E-04 | 7.28E-03 | RNF7        |
| chr7  | 138745355 | 138745355 | 1.9705E+00  | 3.52E-04 | 7.29E-03 | ZC3HAV1     |
| chr7  | 44620447  | 44620447  | 7.9750E-01  | 3.57E-04 | 7.37E-03 | TMED4       |
| chr18 | 23596658  | 23596658  | 1.5764E+00  | 3.56E-04 | 7.37E-03 | SS18        |
| chr16 | 87426007  | 87426007  | 1.3180E+00  | 3.60E-04 | 7.43E-03 | MAP1LC3B    |
| chr12 | 72179801  | 72179801  | 3.0204E-01  | 3.61E-04 | 7.44E-03 | RAB21       |
| chr20 | 417651    | 417651    | 5.4210E-01  | 3.62E-04 | 7.45E-03 | TBC1D20     |
| chr3  | 57546175  | 57546175  | 1.6567E+00  | 3.63E-04 | 7.47E-03 | PDE12       |
| chr16 | 2508367   | 2508367   | 2.6005E-01  | 3.67E-04 | 7.54E-03 | CCNF        |
| chr9  | 123522773 | 123522773 | 6.3429E-01  | 3.69E-04 | 7.59E-03 | FBXW2       |
| chrX  | 46407064  | 46407064  | 1.1299E+00  | 3.76E-04 | 7.71E-03 | ZNF674-AS1  |
| chr20 | 35280711  | 35280711  | 2.1002E-01  | 3.76E-04 | 7.72E-03 | NDRG3       |
| chr22 | 24937461  | 24937461  | 6.8289E-01  | 3.80E-04 | 7.78E-03 | GUCD1       |
| chr19 | 34892392  | 34892392  | 1.1503E+00  | 3.86E-04 | 7.88E-03 | GPI         |
| chr12 | 57648178  | 57648178  | 6.3964E-01  | 3.86E-04 | 7.88E-03 | R3HDM2      |
| chrX  | 46741017  | 46741017  | 1.1455E+00  | 3.86E-04 | 7.88E-03 | RP2         |
| chr3  | 33184305  | 33184305  | 7.9755E-01  | 4.00E-04 | 8.14E-03 | CRTAP       |
| chr19 | 36032240  | 36032240  | 5.6858E-01  | 4.09E-04 | 8.32E-03 | TMEM147-AS1 |
| chr17 | 20904229  | 20904229  | 5.4940E-01  | 4.09E-04 | 8.32E-03 | USP22       |
| chr2  | 202151399 | 202151399 | 6.4658E-01  | 4.14E-04 | 8.39E-03 | CASP8       |
| chr19 | 17453035  | 17453035  | 3.9575E-01  | 4.14E-04 | 8.39E-03 | GTPBP3      |
| chr15 | 58245807  | 58245807  | 2.5052E+00  | 4.22E-04 | 8.54E-03 | ALDH1A2     |
| chr19 | 36032258  | 36032258  | 8.5739E-01  | 4.25E-04 | 8.60E-03 | TMEM147-AS1 |
| chr19 | 14072168  | 14072168  | -7.3898E-02 | 4.26E-04 | 8.62E-03 | DCAF15      |
| chr16 | 70284458  | 70284458  | 7.4134E-01  | 4.27E-04 | 8.62E-03 | EXOSC6      |
| chr12 | 57648143  | 57648143  | 8.4999E-01  | 4.27E-04 | 8.62E-03 | R3HDM2      |
| chr16 | 2508373   | 2508373   | 2.6536E-01  | 4.31E-04 | 8.69E-03 | CCNF        |
| chrX  | 24095340  | 24095340  | 5.7626E-01  | 4.34E-04 | 8.74E-03 | EIF2S3      |
| chr4  | 166263656 | 166263656 | 5.0307E-01  | 4.35E-04 | 8.75E-03 | MSMO1       |
| chr10 | 105885668 | 105885668 | 4.4253E-01  | 4.36E-04 | 8.75E-03 | SFR1        |
| chr14 | 23517106  | 23517106  | #NAME?      | 4.39E-04 | 8.81E-03 | CDH24       |
| chr17 | 5393304   | 5393304   | 6.5104E-01  | 4.42E-04 | 8.85E-03 | MIS12       |
| chr3  | 10193717  | 10193717  | -4.0927E-01 | 4.42E-04 | 8.85E-03 | VHL         |

|       |           |           |             |          |          |              |
|-------|-----------|-----------|-------------|----------|----------|--------------|
| chr3  | 20211754  | 20211754  | 8.3384E-01  | 4.44E-04 | 8.88E-03 | SGO1         |
| chr3  | 57306668  | 57306668  | 5.1162E-01  | 4.53E-04 | 9.04E-03 | APPL1        |
| chr12 | 7085788   | 7085788   | 8.2231E-01  | 4.55E-04 | 9.07E-03 | LPCAT3       |
| chr12 | 7085786   | 7085786   | 8.2744E-01  | 4.56E-04 | 9.09E-03 | LPCAT3       |
| chr16 | 21191685  | 21191685  | 8.3674E-01  | 4.57E-04 | 9.10E-03 | TMEM159      |
| chr15 | 41573117  | 41573117  | 6.8088E-01  | 4.58E-04 | 9.10E-03 | CHP1         |
| chr5  | 10435979  | 10435979  | Inf         | 4.63E-04 | 9.20E-03 | MARCH6       |
| chr14 | 92630182  | 92630182  | 5.6741E-01  | 4.65E-04 | 9.24E-03 | CPSF2        |
| chrX  | 46407057  | 46407057  | 7.6544E-01  | 4.70E-04 | 9.31E-03 | ZNF674-AS1   |
| chr10 | 105885637 | 105885637 | 4.6659E-01  | 4.74E-04 | 9.38E-03 | SFR1         |
| chr16 | 2508369   | 2508369   | 2.9499E-01  | 4.77E-04 | 9.43E-03 | CCNF         |
| chr22 | 36623225  | 36623225  | 5.2775E-01  | 4.80E-04 | 9.48E-03 | APOL2        |
| chr4  | 1813560   | 1813560   | 6.8784E-01  | 4.81E-04 | 9.49E-03 | LETM1        |
| chr7  | 102277708 | 102277708 | 4.4966E-01  | 4.82E-04 | 9.49E-03 | POLR2J2      |
| chr5  | 10435966  | 10435966  | Inf         | 4.82E-04 | 9.49E-03 | MARCH6       |
| chr16 | 21191698  | 21191698  | 4.7449E-01  | 4.86E-04 | 9.56E-03 | TMEM159      |
| chr19 | 18979588  | 18979588  | #NAME?      | 4.90E-04 | 9.62E-03 | GDF1         |
| chr19 | 1038734   | 1038734   | 1.3973E+00  | 4.91E-04 | 9.63E-03 | CNN2         |
| chr4  | 77080742  | 77080742  | Inf         | 5.04E-04 | 9.87E-03 | SCARB2       |
| chr15 | 32930520  | 32930520  | 4.0605E-01  | 5.05E-04 | 9.88E-03 | ARHGAP11A    |
| chr8  | 22878064  | 22878064  | 1.5907E+00  | 5.12E-04 | 1.00E-02 | TNFRSF10B    |
| chr11 | 6505361   | 6505361   | 8.4004E-01  | 5.19E-04 | 1.01E-02 | TIMM10B      |
| chr14 | 92630194  | 92630194  | 7.6051E-01  | 5.25E-04 | 1.02E-02 | CPSF2        |
| chr11 | 46699451  | 46699451  | 7.2935E-01  | 5.25E-04 | 1.02E-02 | ARHGAP1      |
| chr11 | 65542149  | 65542149  | 1.0342E+00  | 5.34E-04 | 1.04E-02 | AP5B1        |
| chr1  | 3729122   | 3729122   | #NAME?      | 5.34E-04 | 1.04E-02 | CEP104       |
| chr1  | 211918968 | 211918968 | 6.7239E-01  | 5.40E-04 | 1.05E-02 | LPGAT1       |
| chr1  | 204392474 | 204392474 | 4.6268E-01  | 5.41E-04 | 1.05E-02 | PIK3C2B      |
| chr2  | 197000369 | 197000369 | 1.0793E+00  | 5.49E-04 | 1.06E-02 | STK17B       |
| chr17 | 43002550  | 43002550  | 3.6537E-01  | 5.49E-04 | 1.06E-02 | KIF18B       |
| chr3  | 141664022 | 141664022 | 1.3387E-01  | 5.57E-04 | 1.08E-02 | TFDP2        |
| chr2  | 202151385 | 202151385 | 4.8011E-01  | 5.57E-04 | 1.08E-02 | CASP8        |
| chr22 | 24937478  | 24937478  | 3.7204E-01  | 5.63E-04 | 1.09E-02 | GUCD1        |
| chr9  | 139978743 | 139978743 | 1.0377E+00  | 5.65E-04 | 1.09E-02 | UAP1L1       |
| chr15 | 58245733  | 58245733  | 2.1554E+00  | 5.72E-04 | 1.10E-02 | ALDH1A2      |
| chr4  | 1381022   | 1381022   | 2.2164E+00  | 5.73E-04 | 1.10E-02 | UVSSA        |
| chr19 | 37002430  | 37002430  | 6.2065E-01  | 5.84E-04 | 1.12E-02 | ZNF260       |
| chr17 | 35875696  | 35875696  | 6.8848E-01  | 5.89E-04 | 1.13E-02 | SYNRG        |
| chr7  | 92166481  | 92166481  | -3.0745E-01 | 5.94E-04 | 1.14E-02 | RBM48        |
| chr3  | 141464939 | 141464939 | 3.3798E-01  | 5.94E-04 | 1.14E-02 | RNF7         |
| chr1  | 235294700 | 235294700 | 1.7755E+00  | 5.93E-04 | 1.14E-02 | RBM34,ARID4B |



|       |           |           |             |          |          |           |
|-------|-----------|-----------|-------------|----------|----------|-----------|
| chr10 | 131978465 | 131978465 | 1.5630E+00  | 5.95E-04 | 1.14E-02 | GLRX3     |
| chr4  | 664182    | 664182    | -1.1023E+00 | 6.07E-04 | 1.16E-02 | PDE6B     |
| chr22 | 24937494  | 24937494  | 4.7597E-01  | 6.10E-04 | 1.16E-02 | GUCD1     |
| chr1  | 100757981 | 100757981 | 2.8833E-01  | 6.15E-04 | 1.17E-02 | RTCA      |
| chr7  | 138745315 | 138745315 | 1.0153E+00  | 6.16E-04 | 1.17E-02 | ZC3HAV1   |
| chr20 | 417654    | 417654    | 4.7961E-01  | 6.17E-04 | 1.17E-02 | TBC1D20   |
| chr12 | 56390375  | 56390375  | 1.1350E+00  | 6.26E-04 | 1.19E-02 | RAB5B     |
| chr1  | 23833875  | 23833875  | 1.6626E+00  | 6.27E-04 | 1.19E-02 | E2F2      |
| chr17 | 18147693  | 18147693  | 8.6331E-01  | 6.30E-04 | 1.19E-02 | LLGL1     |
| chr12 | 57648155  | 57648155  | 1.9281E+00  | 6.36E-04 | 1.20E-02 | R3HDM2    |
| chr3  | 57306669  | 57306669  | 4.0223E-01  | 6.41E-04 | 1.21E-02 | APPL1     |
| chr1  | 3806169   | 3806169   | 7.5336E-01  | 6.46E-04 | 1.22E-02 | C1orf174  |
| chr11 | 46699403  | 46699403  | 4.1173E-01  | 6.57E-04 | 1.24E-02 | ARHGAP1   |
| chr10 | 103606597 | 103606597 | 1.8837E+00  | 6.56E-04 | 1.24E-02 | C10orf76  |
| chr8  | 22878078  | 22878078  | 1.0460E+00  | 6.62E-04 | 1.24E-02 | TNFRSF10B |
| chr14 | 75202683  | 75202683  | -3.9733E-01 | 6.68E-04 | 1.26E-02 | FCF1      |
| chr15 | 32930547  | 32930547  | 4.3432E-01  | 6.73E-04 | 1.26E-02 | ARHGAP11A |
| chr16 | 87426012  | 87426012  | 1.2795E+00  | 6.78E-04 | 1.27E-02 | MAP1LC3B  |
| chr16 | 87426013  | 87426013  | 1.3032E+00  | 6.78E-04 | 1.27E-02 | MAP1LC3B  |
| chr4  | 4237920   | 4237920   | 2.3087E+00  | 6.94E-04 | 1.30E-02 | TMEM128   |
| chr7  | 38417798  | 38417798  | 4.4932E-01  | 7.00E-04 | 1.31E-02 | TRG-AS1   |
| chr13 | 48620845  | 48620845  | 1.5186E+00  | 7.16E-04 | 1.34E-02 | NUDT15    |
| chr22 | 24937516  | 24937516  | 1.7244E+00  | 7.22E-04 | 1.35E-02 | GUCD1     |
| chr3  | 48955491  | 48955491  | 1.5496E+00  | 7.28E-04 | 1.36E-02 | ARIH2OS   |
| chr15 | 65295172  | 65295172  | 1.1343E+00  | 7.31E-04 | 1.36E-02 | MTFMT     |
| chr1  | 23833872  | 23833872  | 1.1286E+00  | 7.35E-04 | 1.37E-02 | E2F2      |
| chr10 | 111894356 | 111894356 | 4.6843E-01  | 7.38E-04 | 1.37E-02 | ADD3      |
| chr10 | 13252175  | 13252175  | 1.1868E+00  | 7.40E-04 | 1.37E-02 | MCM10     |
| chr17 | 20904227  | 20904227  | 6.5248E-01  | 7.42E-04 | 1.38E-02 | USP22     |
| chr1  | 26161009  | 26161009  | 9.5966E-01  | 7.42E-04 | 1.38E-02 | AUNIP     |
| chr19 | 17453032  | 17453032  | 3.3865E-01  | 7.46E-04 | 1.38E-02 | GTPBP3    |
| chr19 | 1038731   | 1038731   | 1.2972E+00  | 7.52E-04 | 1.39E-02 | CNN2      |
| chr16 | 15960951  | 15960951  | 1.6555E+00  | 7.51E-04 | 1.39E-02 | FOPNL     |
| chr1  | 115312922 | 115312922 | 5.9272E-01  | 7.56E-04 | 1.39E-02 | SIKE1     |
| chr3  | 155480846 | 155480846 | 5.1793E-01  | 7.58E-04 | 1.40E-02 | C3orf33   |
| chr22 | 39128851  | 39128851  | 7.1151E-01  | 7.59E-04 | 1.40E-02 | GTPBP1    |
| chr2  | 10270817  | 10270817  | 7.3802E-01  | 7.73E-04 | 1.42E-02 | RRM2      |
| chr7  | 138745349 | 138745349 | 1.3379E+00  | 7.77E-04 | 1.43E-02 | ZC3HAV1   |
| chr22 | 39128820  | 39128820  | 9.5834E-01  | 7.77E-04 | 1.43E-02 | GTPBP1    |
| chr4  | 1381012   | 1381012   | 1.4502E+00  | 7.90E-04 | 1.45E-02 | UVSSA     |
| chr3  | 57306670  | 57306670  | 4.3326E-01  | 7.89E-04 | 1.45E-02 | APPL1     |

|       |           |           |             |          |          |            |
|-------|-----------|-----------|-------------|----------|----------|------------|
| chr5  | 10435943  | 10435943  | 1.7870E+00  | 7.95E-04 | 1.45E-02 | MARCH6     |
| chr4  | 1813556   | 1813556   | 6.2462E-01  | 7.95E-04 | 1.45E-02 | LETM1      |
| chr7  | 92166479  | 92166479  | -3.0690E-01 | 7.99E-04 | 1.46E-02 | RBM48      |
| chr1  | 204373510 | 204373510 | 9.5487E-02  | 8.01E-04 | 1.46E-02 | PPP1R15B   |
| chr1  | 38490365  | 38490365  | 6.1649E-01  | 8.03E-04 | 1.47E-02 | UTP11      |
| chr14 | 75203020  | 75203020  | 7.5660E-02  | 8.12E-04 | 1.48E-02 | FCF1       |
| chrX  | 46407065  | 46407065  | 8.0156E-01  | 8.14E-04 | 1.48E-02 | ZNF674-AS1 |
| chr16 | 75478248  | 75478248  | 7.9151E-01  | 8.15E-04 | 1.48E-02 | TMEM170A   |
| chr4  | 73922596  | 73922596  | 2.4420E-01  | 8.36E-04 | 1.52E-02 | COX18      |
| chr7  | 105097476 | 105097476 | 1.4477E+00  | 8.38E-04 | 1.52E-02 | PUS7       |
| chr22 | 30093678  | 30093678  | 5.5581E-01  | 8.41E-04 | 1.53E-02 | NF2        |
| chr12 | 72179798  | 72179798  | 3.2725E-01  | 8.45E-04 | 1.53E-02 | RAB21      |
| chr17 | 20904230  | 20904230  | 5.9466E-01  | 8.47E-04 | 1.53E-02 | USP22      |
| chr1  | 179832254 | 179832254 | 3.4099E-01  | 8.47E-04 | 1.53E-02 | TOR1AIP2   |
| chr11 | 46401805  | 46401805  | 1.3169E-01  | 8.49E-04 | 1.53E-02 | DGKZ       |
| chr22 | 36623091  | 36623091  | 1.4954E+00  | 8.51E-04 | 1.54E-02 | APOL2      |
| chr1  | 204392453 | 204392453 | 8.5493E-01  | 8.54E-04 | 1.54E-02 | PIK3C2B    |
| chr10 | 105885675 | 105885675 | 4.6097E-01  | 8.58E-04 | 1.54E-02 | SFR1       |
| chr1  | 115312925 | 115312925 | 4.6819E-01  | 8.58E-04 | 1.54E-02 | SIKE1      |
| chr6  | 20102070  | 20102070  | 1.3730E+00  | 8.65E-04 | 1.56E-02 | MBOAT1     |
| chr17 | 5393296   | 5393296   | 7.7573E-01  | 8.70E-04 | 1.56E-02 | MIS12      |
| chr1  | 179832238 | 179832238 | 5.8967E-01  | 8.70E-04 | 1.56E-02 | TOR1AIP2   |
| chr8  | 28048222  | 28048222  | 9.9311E-01  | 8.82E-04 | 1.58E-02 | ELP3       |
| chr1  | 179832259 | 179832259 | 3.9183E-01  | 8.85E-04 | 1.59E-02 | TOR1AIP2   |
| chr4  | 6718859   | 6718859   | 6.4184E-01  | 8.88E-04 | 1.59E-02 | BLOC1S4    |
| chr1  | 115312916 | 115312916 | 4.2505E-01  | 8.92E-04 | 1.59E-02 | SIKE1      |
| chr1  | 9788148   | 9788148   | 4.4287E-01  | 8.97E-04 | 1.60E-02 | PIK3CD     |
| chr3  | 10193711  | 10193711  | -4.3963E-01 | 9.01E-04 | 1.61E-02 | VHL        |
| chr1  | 179832255 | 179832255 | 3.0412E-01  | 9.13E-04 | 1.63E-02 | TOR1AIP2   |
| chr12 | 57648148  | 57648148  | 1.0213E+00  | 9.21E-04 | 1.64E-02 | R3HDM2     |
| chr16 | 87426009  | 87426009  | 1.9880E+00  | 9.28E-04 | 1.65E-02 | MAP1LC3B   |
| chr5  | 10435969  | 10435969  | 1.3072E+00  | 9.40E-04 | 1.67E-02 | MARCH6     |
| chr5  | 176778564 | 176778564 | -5.5790E-02 | 9.40E-04 | 1.67E-02 | LMAN2      |
| chr12 | 57648151  | 57648151  | 1.3078E+00  | 9.41E-04 | 1.67E-02 | R3HDM2     |
| chr19 | 17453033  | 17453033  | 3.4468E-01  | 9.43E-04 | 1.67E-02 | GTPBP3     |
| chr11 | 120203373 | 120203373 | 4.9790E-01  | 9.45E-04 | 1.67E-02 | TMEM136    |
| chr1  | 23833909  | 23833909  | 1.0512E+00  | 9.51E-04 | 1.68E-02 | E2F2       |
| chr11 | 65542150  | 65542150  | 1.0204E+00  | 9.54E-04 | 1.69E-02 | AP5B1      |
| chr22 | 30093687  | 30093687  | 5.6206E-01  | 9.56E-04 | 1.69E-02 | NF2        |
| chr19 | 1038730   | 1038730   | 1.2408E+00  | 9.61E-04 | 1.70E-02 | CNN2       |
| chr4  | 83551860  | 83551860  | 1.2766E+00  | 9.64E-04 | 1.70E-02 | SCD5       |

|       |           |           |             |          |          |             |
|-------|-----------|-----------|-------------|----------|----------|-------------|
| chr17 | 76203505  | 76203505  | 7.1722E-01  | 9.66E-04 | 1.70E-02 | AFMID       |
| chr11 | 65542148  | 65542148  | 1.0337E+00  | 9.67E-04 | 1.70E-02 | AP5B1       |
| chr22 | 24937495  | 24937495  | 3.6027E-01  | 9.83E-04 | 1.73E-02 | GUCD1       |
| chr5  | 177631819 | 177631819 | -3.0632E-01 | 9.84E-04 | 1.73E-02 | HNRNPAB     |
| chr19 | 1038729   | 1038729   | 1.1599E+00  | 9.90E-04 | 1.74E-02 | CNN2        |
| chr7  | 156803082 | 156803082 | -1.4379E+00 | 1.01E-03 | 1.78E-02 | MNX1        |
| chr3  | 57306916  | 57306916  | 1.3061E+00  | 1.02E-03 | 1.78E-02 | APPL1       |
| chr6  | 20102078  | 20102078  | 1.9369E+00  | 1.02E-03 | 1.79E-02 | MBOAT1      |
| chr17 | 76203488  | 76203488  | 6.1196E-01  | 1.03E-03 | 1.79E-02 | AFMID       |
| chr16 | 50139142  | 50139142  | 1.8915E-01  | 1.04E-03 | 1.81E-02 | HEATR3      |
| chr16 | 29754197  | 29754197  | Inf         | 1.04E-03 | 1.81E-02 | C16orf54    |
| chr17 | 43002718  | 43002718  | 4.7045E-01  | 1.05E-03 | 1.83E-02 | KIF18B      |
| chr15 | 32930412  | 32930412  | 2.5053E-01  | 1.07E-03 | 1.86E-02 | ARHGAP11A   |
| chr11 | 768267    | 768267    | -9.1893E-01 | 1.07E-03 | 1.87E-02 | GATD1       |
| chr6  | 108533306 | 108533306 | Inf         | 1.08E-03 | 1.88E-02 | SNX3        |
| chr1  | 179832258 | 179832258 | 4.6723E-01  | 1.09E-03 | 1.89E-02 | TOR1AIP2    |
| chr19 | 48984886  | 48984886  | 9.1243E-01  | 1.10E-03 | 1.90E-02 | CYTH2       |
| chr14 | 92629370  | 92629370  | 7.7683E-01  | 1.11E-03 | 1.92E-02 | CPSF2       |
| chr12 | 7085780   | 7085780   | 7.6276E-01  | 1.11E-03 | 1.93E-02 | LPCAT3      |
| chr11 | 65542170  | 65542170  | 1.2814E+00  | 1.12E-03 | 1.93E-02 | AP5B1       |
| chr4  | 89179643  | 89179643  | 5.0025E-01  | 1.13E-03 | 1.94E-02 | PPM1K       |
| chr9  | 123522769 | 123522769 | 5.4983E-01  | 1.13E-03 | 1.94E-02 | FBXW2       |
| chr16 | 69153594  | 69153594  | -1.1795E-01 | 1.13E-03 | 1.95E-02 | CHTF8       |
| chr8  | 104411997 | 104411997 | 4.7767E-01  | 1.13E-03 | 1.95E-02 | SLC25A32    |
| chr3  | 10194431  | 10194431  | 6.5586E-02  | 1.15E-03 | 1.98E-02 | VHL         |
| chr6  | 28090890  | 28090890  | 1.3963E+00  | 1.15E-03 | 1.98E-02 | ZSCAN16-AS1 |
| chr17 | 43002791  | 43002791  | 5.6562E-01  | 1.17E-03 | 2.00E-02 | KIF18B      |
| chr21 | 45547952  | 45547952  | 3.1392E-01  | 1.17E-03 | 2.00E-02 | PWP2        |
| chr15 | 44158983  | 44158983  | 1.7166E+00  | 1.18E-03 | 2.02E-02 | WDR76       |
| chr14 | 92630184  | 92630184  | 5.4958E-01  | 1.18E-03 | 2.02E-02 | CPSF2       |
| chr12 | 133298897 | 133298897 | 8.3152E-01  | 1.18E-03 | 2.02E-02 | PGAM5       |
| chr19 | 17453029  | 17453029  | 4.0224E-01  | 1.19E-03 | 2.02E-02 | GTPBP3      |
| chr11 | 46694887  | 46694887  | 5.7471E-01  | 1.20E-03 | 2.04E-02 | ATG13       |
| chr19 | 45911189  | 45911189  | 6.2279E-01  | 1.21E-03 | 2.05E-02 | ERCC1       |
| chr17 | 5393309   | 5393309   | 6.3052E-01  | 1.20E-03 | 2.05E-02 | MIS12       |
| chr11 | 46699457  | 46699457  | 4.0154E-01  | 1.21E-03 | 2.05E-02 | ARHGAP1     |
| chr1  | 115312926 | 115312926 | 4.1322E-01  | 1.21E-03 | 2.05E-02 | SIKE1       |
| chr3  | 141464938 | 141464938 | 3.1690E-01  | 1.22E-03 | 2.07E-02 | RNF7        |
| chr9  | 123522783 | 123522783 | 7.7489E-01  | 1.23E-03 | 2.08E-02 | FBXW2       |
| chr12 | 56390378  | 56390378  | 7.9608E-01  | 1.24E-03 | 2.10E-02 | RAB5B       |
| chr17 | 5393300   | 5393300   | 6.3491E-01  | 1.25E-03 | 2.12E-02 | MIS12       |

|       |           |           |             |          |          |           |
|-------|-----------|-----------|-------------|----------|----------|-----------|
| chr16 | 87426010  | 87426010  | 1.2867E+00  | 1.25E-03 | 2.12E-02 | MAP1LC3B  |
| chr19 | 1430258   | 1430258   | -8.1084E-02 | 1.26E-03 | 2.12E-02 | DAZAP1    |
| chr17 | 20904243  | 20904243  | 6.2520E-01  | 1.26E-03 | 2.12E-02 | USP22     |
| chr3  | 141464943 | 141464943 | 3.5423E-01  | 1.26E-03 | 2.12E-02 | RNF7      |
| chr2  | 120978204 | 120978204 | 4.3808E-01  | 1.28E-03 | 2.15E-02 | TMEM185B  |
| chr12 | 57648179  | 57648179  | 5.2231E-01  | 1.28E-03 | 2.15E-02 | R3HDM2    |
| chr16 | 29818415  | 29818415  | 7.7959E-02  | 1.28E-03 | 2.15E-02 | MAZ       |
| chr8  | 22878074  | 22878074  | 1.7051E+00  | 1.29E-03 | 2.16E-02 | TNFRSF10B |
| chr7  | 102277707 | 102277707 | 3.6719E-01  | 1.30E-03 | 2.18E-02 | POLR2J2   |
| chr22 | 39128857  | 39128857  | 7.3291E-01  | 1.30E-03 | 2.18E-02 | GTPBP1    |
| chr7  | 44620443  | 44620443  | 6.5009E-01  | 1.31E-03 | 2.19E-02 | TMED4     |
| chr11 | 46699465  | 46699465  | 4.3184E-01  | 1.32E-03 | 2.21E-02 | ARHGAP1   |
| chr3  | 133292766 | 133292766 | 3.1850E-01  | 1.32E-03 | 2.21E-02 | CDV3      |
| chr5  | 10435953  | 10435953  | 1.8341E+00  | 1.33E-03 | 2.22E-02 | MARCH6    |
| chr5  | 10435951  | 10435951  | 1.1233E+00  | 1.33E-03 | 2.22E-02 | MARCH6    |
| chr11 | 768843    | 768843    | -8.6904E-01 | 1.34E-03 | 2.23E-02 | GATD1     |
| chr20 | 35280717  | 35280717  | 1.9752E-01  | 1.35E-03 | 2.24E-02 | NDRG3     |
| chr19 | 1038704   | 1038704   | 1.0733E+00  | 1.35E-03 | 2.25E-02 | CNN2      |
| chr10 | 15117874  | 15117874  | 2.1615E+00  | 1.35E-03 | 2.25E-02 | ACBD7     |
| chr3  | 10194433  | 10194433  | 5.6230E-02  | 1.36E-03 | 2.25E-02 | VHL       |
| chr3  | 156258123 | 156258123 | 4.7296E-01  | 1.37E-03 | 2.27E-02 | SSR3      |
| chr12 | 56390372  | 56390372  | 1.7459E+00  | 1.38E-03 | 2.28E-02 | RAB5B     |
| chr20 | 417652    | 417652    | 4.6909E-01  | 1.38E-03 | 2.28E-02 | TBC1D20   |
| chr9  | 117407193 | 117407193 | 1.2109E+00  | 1.38E-03 | 2.28E-02 | TMEM268   |
| chr1  | 26160969  | 26160969  | 9.2424E-01  | 1.39E-03 | 2.29E-02 | AUNIP     |
| chr1  | 26161011  | 26161011  | 6.6974E-01  | 1.39E-03 | 2.29E-02 | AUNIP     |
| chr4  | 664178    | 664178    | -8.2719E-01 | 1.40E-03 | 2.30E-02 | PDE6B     |
| chr19 | 48984893  | 48984893  | 9.9610E-01  | 1.40E-03 | 2.30E-02 | CYTH2     |
| chr12 | 122216088 | 122216088 | 6.0057E-01  | 1.40E-03 | 2.30E-02 | RHOF      |
| chr4  | 73922569  | 73922569  | 2.4774E-01  | 1.41E-03 | 2.31E-02 | COX18     |
| chr1  | 204392449 | 204392449 | 7.2460E-01  | 1.42E-03 | 2.32E-02 | PIK3C2B   |
| chr22 | 36623094  | 36623094  | 1.2232E+00  | 1.47E-03 | 2.41E-02 | APOL2     |
| chr7  | 2703744   | 2703744   | -4.3230E-02 | 1.48E-03 | 2.42E-02 | TTYH3     |
| chr15 | 65295195  | 65295195  | 3.0649E-01  | 1.48E-03 | 2.42E-02 | MTFMT     |
| chr7  | 106300874 | 106300874 | 2.1688E-01  | 1.50E-03 | 2.45E-02 | CCDC71L   |
| chr5  | 10435948  | 10435948  | 1.1238E+00  | 1.51E-03 | 2.46E-02 | MARCH6    |
| chr4  | 73922875  | 73922875  | -6.2531E-01 | 1.51E-03 | 2.46E-02 | COX18     |
| chr16 | 50139147  | 50139147  | 1.1296E-01  | 1.51E-03 | 2.46E-02 | HEATR3    |
| chr1  | 26161001  | 26161001  | 6.7449E-01  | 1.51E-03 | 2.46E-02 | AUNIP     |
| chr1  | 3806028   | 3806028   | 1.3270E+00  | 1.54E-03 | 2.50E-02 | C1orf174  |
| chr15 | 32930551  | 32930551  | 2.7336E-01  | 1.56E-03 | 2.53E-02 | ARHGAP11A |

|       |           |           |             |          |          |             |
|-------|-----------|-----------|-------------|----------|----------|-------------|
| chr7  | 44620444  | 44620444  | 7.7678E-01  | 1.56E-03 | 2.53E-02 | TMED4       |
| chr3  | 10194429  | 10194429  | 6.7131E-02  | 1.57E-03 | 2.54E-02 | VHL         |
| chr16 | 70284465  | 70284465  | 6.6709E-01  | 1.57E-03 | 2.54E-02 | EXOSC6      |
| chr20 | 417650    | 417650    | 4.5621E-01  | 1.57E-03 | 2.54E-02 | TBC1D20     |
| chr17 | 17115893  | 17115893  | -8.3066E-01 | 1.57E-03 | 2.54E-02 | FLCN        |
| chr19 | 48984901  | 48984901  | 5.7659E-01  | 1.57E-03 | 2.54E-02 | CYTH2       |
| chr19 | 34892489  | 34892489  | 1.6259E+00  | 1.58E-03 | 2.56E-02 | GPI         |
| chr4  | 83551930  | 83551930  | 8.2588E-01  | 1.59E-03 | 2.56E-02 | SCD5        |
| chrX  | 46741020  | 46741020  | 4.8703E-01  | 1.60E-03 | 2.57E-02 | RP2         |
| chr16 | 66977829  | 66977829  | -1.3546E+00 | 1.60E-03 | 2.57E-02 | CES2        |
| chr20 | 34635175  | 34635175  | 1.2330E+00  | 1.61E-03 | 2.59E-02 | NORAD       |
| chr1  | 204392473 | 204392473 | 4.0812E-01  | 1.61E-03 | 2.59E-02 | PIK3C2B     |
| chr9  | 15460677  | 15460677  | 1.7237E+00  | 1.62E-03 | 2.59E-02 | SNAPC3      |
| chr15 | 65295199  | 65295199  | 2.5544E-01  | 1.65E-03 | 2.65E-02 | MTFMT       |
| chr8  | 104412004 | 104412004 | 9.8654E-01  | 1.66E-03 | 2.66E-02 | SLC25A32    |
| chr3  | 10194428  | 10194428  | 6.8081E-02  | 1.68E-03 | 2.69E-02 | VHL         |
| chr11 | 768839    | 768839    | -1.8865E-01 | 1.68E-03 | 2.69E-02 | GATD1       |
| chr19 | 56164374  | 56164374  | -1.3191E-01 | 1.69E-03 | 2.71E-02 | CCDC106     |
| chr20 | 25428739  | 25428739  | 2.4201E-01  | 1.74E-03 | 2.78E-02 | GINS1       |
| chr1  | 26161005  | 26161005  | 6.4795E-01  | 1.74E-03 | 2.78E-02 | AUNIP       |
| chr9  | 135251139 | 135251139 | -4.3415E-01 | 1.75E-03 | 2.80E-02 | TTF1        |
| chr22 | 24937498  | 24937498  | 3.5094E-01  | 1.76E-03 | 2.80E-02 | GUCD1       |
| chr3  | 141664010 | 141664010 | 1.4317E-01  | 1.76E-03 | 2.80E-02 | TFDP2       |
| chr12 | 6875850   | 6875850   | 5.4551E-02  | 1.77E-03 | 2.82E-02 | PTMS        |
| chr6  | 28090882  | 28090882  | 1.5360E+00  | 1.83E-03 | 2.91E-02 | ZSCAN16-AS1 |
| chr16 | 66977830  | 66977830  | -1.3303E+00 | 1.83E-03 | 2.91E-02 | CES2        |
| chr1  | 47682970  | 47682970  | 1.7201E+00  | 1.86E-03 | 2.94E-02 | TAL1        |
| chr7  | 48003367  | 48003367  | 4.3870E-01  | 1.86E-03 | 2.94E-02 | HUS1        |
| chr17 | 1325709   | 1325709   | 2.2291E+00  | 1.86E-03 | 2.95E-02 | CRK         |
| chr7  | 156803078 | 156803078 | -1.4236E+00 | 1.87E-03 | 2.96E-02 | MNX1        |
| chr2  | 197000368 | 197000368 | 6.5350E-01  | 1.87E-03 | 2.96E-02 | STK17B      |
| chr1  | 204373508 | 204373508 | 7.7438E-02  | 1.89E-03 | 2.98E-02 | PPP1R15B    |
| chr1  | 115312915 | 115312915 | 5.4007E-01  | 1.90E-03 | 3.00E-02 | SIKE1       |
| chr6  | 149980490 | 149980490 | Inf         | 1.91E-03 | 3.00E-02 | LATS1       |
| chr4  | 1381017   | 1381017   | 1.0842E+00  | 1.91E-03 | 3.01E-02 | UVSSA       |
| chr1  | 115312919 | 115312919 | 3.8938E-01  | 1.93E-03 | 3.03E-02 | SIKE1       |
| chr10 | 101370929 | 101370929 | 2.5633E+00  | 1.94E-03 | 3.06E-02 | SLC25A28    |
| chr9  | 36215088  | 36215088  | 3.6889E-01  | 1.95E-03 | 3.06E-02 | GNE         |
| chr12 | 133298957 | 133298957 | 2.2305E-01  | 1.96E-03 | 3.08E-02 | PGAM5       |
| chr2  | 120978201 | 120978201 | 4.2570E-01  | 1.96E-03 | 3.08E-02 | TMEM185B    |
| chr4  | 73922606  | 73922606  | 4.0062E-01  | 2.00E-03 | 3.12E-02 | COX18       |

|       |           |           |             |          |          |             |
|-------|-----------|-----------|-------------|----------|----------|-------------|
| chr17 | 18112313  | 18112313  | -6.6277E-02 | 2.00E-03 | 3.12E-02 | ALKBH5      |
| chr15 | 32930326  | 32930326  | 3.8199E-01  | 2.00E-03 | 3.13E-02 | ARHGAP11A   |
| chr10 | 51590548  | 51590548  | Inf         | 2.00E-03 | 3.13E-02 | NCOA4       |
| chr9  | 15460675  | 15460675  | 1.6169E+00  | 2.02E-03 | 3.15E-02 | SNAPC3      |
| chr7  | 44620441  | 44620441  | 7.6909E-01  | 2.03E-03 | 3.16E-02 | TMED4       |
| chr1  | 204373499 | 204373499 | 7.1863E-02  | 2.03E-03 | 3.16E-02 | PPP1R15B    |
| chr7  | 92166482  | 92166482  | -3.0025E-01 | 2.04E-03 | 3.17E-02 | RBM48       |
| chr15 | 65295174  | 65295174  | 2.5789E-01  | 2.03E-03 | 3.17E-02 | MTFMT       |
| chr17 | 43002719  | 43002719  | 5.2300E-01  | 2.05E-03 | 3.19E-02 | KIF18B      |
| chr6  | 20102069  | 20102069  | 1.3508E+00  | 2.05E-03 | 3.19E-02 | MBOAT1      |
| chr22 | 39128814  | 39128814  | 2.3102E+00  | 2.07E-03 | 3.22E-02 | GTPBP1      |
| chr16 | 2508366   | 2508366   | 2.7632E-01  | 2.11E-03 | 3.27E-02 | CCNF        |
| chr10 | 13252178  | 13252178  | 1.1591E+00  | 2.12E-03 | 3.28E-02 | MCM10       |
| chr1  | 109759493 | 109759493 | 8.8573E-01  | 2.12E-03 | 3.28E-02 | SARS        |
| chr2  | 197000379 | 197000379 | 5.7906E-01  | 2.13E-03 | 3.29E-02 | STK17B      |
| chr17 | 76203487  | 76203487  | 5.8199E-01  | 2.13E-03 | 3.29E-02 | AFMID       |
| chrX  | 46741054  | 46741054  | 1.9160E+00  | 2.15E-03 | 3.32E-02 | RP2         |
| chr5  | 140050164 | 140050164 | -1.5898E+00 | 2.15E-03 | 3.32E-02 | WDR55       |
| chr19 | 56164372  | 56164372  | -1.2675E-01 | 2.17E-03 | 3.34E-02 | CCDC106     |
| chr7  | 56078954  | 56078954  | 8.3551E-02  | 2.17E-03 | 3.35E-02 | PSPH        |
| chr6  | 28090884  | 28090884  | 1.3190E+00  | 2.19E-03 | 3.36E-02 | ZSCAN16-AS1 |
| chr5  | 176778563 | 176778563 | -5.3550E-02 | 2.18E-03 | 3.36E-02 | LMAN2       |
| chr17 | 5393306   | 5393306   | 5.1502E-01  | 2.19E-03 | 3.36E-02 | MIS12       |
| chr12 | 57648188  | 57648188  | 4.9352E-01  | 2.18E-03 | 3.36E-02 | R3HDM2      |
| chr11 | 65180573  | 65180573  | 5.0347E-01  | 2.19E-03 | 3.36E-02 | FRMD8       |
| chr19 | 13884594  | 13884594  | 1.2527E-01  | 2.19E-03 | 3.36E-02 | MRI1        |
| chr19 | 17453036  | 17453036  | 3.4106E-01  | 2.19E-03 | 3.36E-02 | GTPBP3      |
| chr3  | 10194432  | 10194432  | 5.6174E-02  | 2.22E-03 | 3.40E-02 | VHL         |
| chr3  | 150480482 | 150480482 | 2.3156E-01  | 2.22E-03 | 3.40E-02 | SIAH2       |
| chr6  | 18130413  | 18130413  | 1.6756E-01  | 2.23E-03 | 3.40E-02 | TPMT        |
| chr22 | 24937572  | 24937572  | 7.0039E-01  | 2.23E-03 | 3.41E-02 | GUCD1       |
| chr4  | 148555998 | 148555998 | 5.7500E-01  | 2.25E-03 | 3.42E-02 | TMEM184C    |
| chr2  | 10270803  | 10270803  | 3.6429E-01  | 2.25E-03 | 3.43E-02 | RRM2        |
| chr22 | 36623122  | 36623122  | 1.4290E+00  | 2.26E-03 | 3.44E-02 | APOL2       |
| chr16 | 50139159  | 50139159  | 2.2527E-01  | 2.27E-03 | 3.45E-02 | HEATR3      |
| chr4  | 73922607  | 73922607  | 3.2008E-01  | 2.31E-03 | 3.51E-02 | COX18       |
| chr7  | 100210428 | 100210428 | -3.2023E-01 | 2.34E-03 | 3.56E-02 | MOSPD3      |
| chr22 | 39128854  | 39128854  | 8.6454E-01  | 2.37E-03 | 3.60E-02 | GTPBP1      |
| chr17 | 17115886  | 17115886  | -8.2565E-01 | 2.40E-03 | 3.64E-02 | FLCN        |
| chr16 | 29818430  | 29818430  | 5.4040E-02  | 2.42E-03 | 3.65E-02 | MAZ         |
| chr15 | 40712056  | 40712056  | 2.3126E+00  | 2.41E-03 | 3.65E-02 | IVD         |

|       |           |           |             |          |          |           |
|-------|-----------|-----------|-------------|----------|----------|-----------|
| chr12 | 57648157  | 57648157  | 1.2108E+00  | 2.42E-03 | 3.65E-02 | R3HDM2    |
| chr1  | 115312921 | 115312921 | 4.9899E-01  | 2.42E-03 | 3.65E-02 | SIKE1     |
| chr2  | 197000399 | 197000399 | 8.7512E-01  | 2.42E-03 | 3.65E-02 | STK17B    |
| chr22 | 36623242  | 36623242  | 3.8869E-01  | 2.42E-03 | 3.65E-02 | APOL2     |
| chr17 | 18147602  | 18147602  | 8.7259E-01  | 2.44E-03 | 3.68E-02 | LLGL1     |
| chr14 | 20811510  | 20811510  | -1.2623E-01 | 2.45E-03 | 3.69E-02 | RPPH1     |
| chr11 | 65180574  | 65180574  | 6.2312E-01  | 2.45E-03 | 3.69E-02 | FRMD8     |
| chr11 | 120203382 | 120203382 | 9.1020E-01  | 2.45E-03 | 3.69E-02 | TMEM136   |
| chr10 | 13252164  | 13252164  | 9.1662E-01  | 2.46E-03 | 3.70E-02 | MCM10     |
| chr1  | 23833906  | 23833906  | 1.0071E+00  | 2.48E-03 | 3.71E-02 | E2F2      |
| chr17 | 5393312   | 5393312   | 5.1141E-01  | 2.52E-03 | 3.77E-02 | MIS12     |
| chr14 | 75202676  | 75202676  | -4.1949E-01 | 2.54E-03 | 3.80E-02 | FCF1      |
| chr1  | 109759500 | 109759500 | 8.8020E-01  | 2.54E-03 | 3.80E-02 | SARS      |
| chr9  | 123522779 | 123522779 | 7.6801E-01  | 2.55E-03 | 3.81E-02 | FBXW2     |
| chr4  | 4237871   | 4237871   | 1.5017E+00  | 2.56E-03 | 3.82E-02 | TMEM128   |
| chr3  | 156258117 | 156258117 | 4.5413E-01  | 2.56E-03 | 3.82E-02 | SSR3      |
| chr22 | 24937471  | 24937471  | 3.3012E-01  | 2.56E-03 | 3.82E-02 | GUCD1     |
| chr19 | 1038725   | 1038725   | 1.2184E+00  | 2.57E-03 | 3.83E-02 | CNN2      |
| chr17 | 5393299   | 5393299   | 5.1292E-01  | 2.59E-03 | 3.85E-02 | MIS12     |
| chr20 | 62371264  | 62371264  | -2.4604E-01 | 2.59E-03 | 3.86E-02 | SLC2A4RG  |
| chr1  | 179832256 | 179832256 | 3.5668E-01  | 2.60E-03 | 3.87E-02 | TOR1AIP2  |
| chr16 | 75600307  | 75600307  | 5.2238E-01  | 2.61E-03 | 3.87E-02 | GABARAPL2 |
| chr4  | 1381020   | 1381020   | 1.0947E+00  | 2.61E-03 | 3.87E-02 | UVSSA     |
| chr4  | 1381014   | 1381014   | 8.2887E-01  | 2.64E-03 | 3.92E-02 | UVSSA     |
| chr13 | 48620840  | 48620840  | 1.8710E+00  | 2.66E-03 | 3.94E-02 | NUDT15    |
| chr17 | 17115899  | 17115899  | -8.1673E-01 | 2.67E-03 | 3.96E-02 | FLCN      |
| chr9  | 36215185  | 36215185  | -4.0536E-01 | 2.69E-03 | 3.97E-02 | GNE       |
| chr8  | 77894931  | 77894931  | 1.1187E+00  | 2.69E-03 | 3.98E-02 | PEX2      |
| chr12 | 58152524  | 58152524  | -6.5617E-02 | 2.70E-03 | 3.98E-02 | MARCH9    |
| chr12 | 102139693 | 102139693 | 1.0665E+00  | 2.70E-03 | 3.98E-02 | GNPTAB    |
| chr1  | 109759489 | 109759489 | 1.4435E+00  | 2.70E-03 | 3.98E-02 | SARS      |
| chr19 | 1038722   | 1038722   | 1.3840E+00  | 2.70E-03 | 3.98E-02 | CNN2      |
| chr4  | 73922597  | 73922597  | 2.1218E-01  | 2.72E-03 | 4.00E-02 | COX18     |
| chr19 | 1038727   | 1038727   | 1.1314E+00  | 2.72E-03 | 4.00E-02 | CNN2      |
| chr10 | 104498170 | 104498170 | 1.1614E+00  | 2.73E-03 | 4.02E-02 | SFXN2     |
| chr11 | 120203379 | 120203379 | 4.7322E-01  | 2.76E-03 | 4.05E-02 | TMEM136   |
| chr2  | 204296301 | 204296301 | -2.2176E+00 | 2.77E-03 | 4.06E-02 | ABI2      |
| chr19 | 14072173  | 14072173  | -6.5297E-02 | 2.77E-03 | 4.06E-02 | DCAF15    |
| chr2  | 120978207 | 120978207 | 8.1585E-01  | 2.78E-03 | 4.06E-02 | TMEM185B  |
| chrX  | 13731090  | 13731090  | 8.1661E-01  | 2.78E-03 | 4.07E-02 | TRAPPC2   |
| chr8  | 23290130  | 23290130  | 9.5647E-01  | 2.79E-03 | 4.08E-02 | ENTPD4    |

|       |           |           |             |          |          |             |
|-------|-----------|-----------|-------------|----------|----------|-------------|
| chr19 | 37002416  | 37002416  | 9.7703E-01  | 2.79E-03 | 4.08E-02 | ZNF260      |
| chr9  | 33045723  | 33045723  | 9.8974E-01  | 2.83E-03 | 4.11E-02 | SMU1        |
| chr20 | 35221342  | 35221342  | 8.8556E-01  | 2.82E-03 | 4.11E-02 | TGIF2       |
| chr2  | 197000400 | 197000400 | 1.0708E+00  | 2.83E-03 | 4.11E-02 | STK17B      |
| chr16 | 21191694  | 21191694  | 3.7522E-01  | 2.82E-03 | 4.11E-02 | TMEM159     |
| chr10 | 105885677 | 105885677 | 4.1107E-01  | 2.83E-03 | 4.12E-02 | SFR1        |
| chr17 | 35875796  | 35875796  | 4.8462E-01  | 2.85E-03 | 4.15E-02 | SYNRG       |
| chr5  | 10435952  | 10435952  | 1.0819E+00  | 2.86E-03 | 4.15E-02 | MARCH6      |
| chr19 | 37035999  | 37035999  | 1.0542E+00  | 2.88E-03 | 4.17E-02 | ZNF529      |
| chr1  | 115312937 | 115312937 | 6.4387E-01  | 2.88E-03 | 4.17E-02 | SIKE1       |
| chr1  | 23833865  | 23833865  | 1.1435E+00  | 2.89E-03 | 4.18E-02 | E2F2        |
| chr7  | 44620419  | 44620419  | 7.4517E-01  | 2.90E-03 | 4.20E-02 | TMED4       |
| chr10 | 15117880  | 15117880  | 2.1068E+00  | 2.91E-03 | 4.22E-02 | ACBD7       |
| chr22 | 24937560  | 24937560  | 6.8538E-01  | 2.92E-03 | 4.22E-02 | GUCD1       |
| chr3  | 141664019 | 141664019 | 1.2606E-01  | 2.94E-03 | 4.24E-02 | TFDP2       |
| chr6  | 28090881  | 28090881  | 1.3219E+00  | 2.97E-03 | 4.29E-02 | ZSCAN16-AS1 |
| chr4  | 159630578 | 159630578 | 8.2699E-01  | 3.00E-03 | 4.34E-02 | PPID        |
| chr19 | 1038675   | 1038675   | 8.5178E-01  | 3.01E-03 | 4.34E-02 | CNN2        |
| chr11 | 65542162  | 65542162  | 7.8488E-01  | 3.01E-03 | 4.34E-02 | AP5B1       |
| chr14 | 92630173  | 92630173  | 5.5708E-01  | 3.05E-03 | 4.39E-02 | CPSF2       |
| chr3  | 57306742  | 57306742  | 5.6145E-01  | 3.06E-03 | 4.40E-02 | APPL1       |
| chr19 | 14072167  | 14072167  | -6.2842E-02 | 3.07E-03 | 4.41E-02 | DCAF15      |
| chr1  | 3806178   | 3806178   | 1.1313E+00  | 3.08E-03 | 4.42E-02 | C1orf174    |
| chr3  | 141464941 | 141464941 | 3.3808E-01  | 3.09E-03 | 4.43E-02 | RNF7        |
| chr17 | 43002792  | 43002792  | 5.8299E-01  | 3.10E-03 | 4.45E-02 | KIF18B      |
| chr19 | 1038620   | 1038620   | 6.1263E-01  | 3.11E-03 | 4.46E-02 | CNN2        |
| chr3  | 10193718  | 10193718  | -3.3239E-01 | 3.12E-03 | 4.47E-02 | VHL         |
| chr9  | 140099920 | 140099920 | 1.6214E+00  | 3.13E-03 | 4.47E-02 | TMEM203     |
| chr2  | 202151461 | 202151461 | 3.0674E-01  | 3.13E-03 | 4.48E-02 | CASP8       |
| chr19 | 13884592  | 13884592  | 1.1758E-01  | 3.14E-03 | 4.49E-02 | MRI1        |
| chr4  | 1813569   | 1813569   | 1.1451E+00  | 3.15E-03 | 4.50E-02 | LETM1       |
| chr4  | 83551862  | 83551862  | 1.2427E+00  | 3.16E-03 | 4.51E-02 | SCD5        |
| chr13 | 48620850  | 48620850  | 1.1829E+00  | 3.17E-03 | 4.52E-02 | NUDT15      |
| chr3  | 57546339  | 57546339  | Inf         | 3.18E-03 | 4.53E-02 | PDE12       |
| chr19 | 13884595  | 13884595  | 1.0856E-01  | 3.18E-03 | 4.53E-02 | MRI1        |
| chr3  | 141464942 | 141464942 | 2.9080E-01  | 3.22E-03 | 4.58E-02 | RNF7        |
| chr7  | 2703821   | 2703821   | -7.0753E-02 | 3.23E-03 | 4.59E-02 | TTYH3       |
| chr6  | 28090893  | 28090893  | 1.4946E+00  | 3.26E-03 | 4.62E-02 | ZSCAN16-AS1 |
| chr9  | 123522804 | 123522804 | 9.7223E-01  | 3.28E-03 | 4.65E-02 | FBXW2       |
| chr15 | 52840582  | 52840582  | 1.0077E+00  | 3.32E-03 | 4.70E-02 | ARPP19      |
| chr17 | 20904232  | 20904232  | 5.5609E-01  | 3.32E-03 | 4.71E-02 | USP22       |



|       |           |           |             |          |          |             |
|-------|-----------|-----------|-------------|----------|----------|-------------|
| chr20 | 35221353  | 35221353  | 8.8347E-01  | 3.33E-03 | 4.71E-02 | TGIF2       |
| chr17 | 17116046  | 17116046  | -6.6979E-01 | 3.34E-03 | 4.73E-02 | FLCN        |
| chr19 | 21368518  | 21368518  | 2.2349E-01  | 3.37E-03 | 4.76E-02 | ZNF431      |
| chr1  | 3806166   | 3806166   | 5.0168E-01  | 3.37E-03 | 4.76E-02 | C1orf174    |
| chr11 | 66626366  | 66626366  | 9.7205E-02  | 3.38E-03 | 4.77E-02 | LRFN4       |
| chr19 | 14072166  | 14072166  | -6.3645E-02 | 3.40E-03 | 4.79E-02 | DCAF15      |
| chr10 | 13252177  | 13252177  | 1.1399E+00  | 3.40E-03 | 4.79E-02 | MCM10       |
| chr7  | 135360733 | 135360733 | 9.8725E-01  | 3.42E-03 | 4.82E-02 | STMP1       |
| chr4  | 166263658 | 166263658 | 6.4993E-01  | 3.44E-03 | 4.84E-02 | MSMO1       |
| chr12 | 57648141  | 57648141  | 9.9547E-01  | 3.45E-03 | 4.86E-02 | R3HDM2      |
| chr6  | 28090885  | 28090885  | 1.2885E+00  | 3.48E-03 | 4.89E-02 | ZSCAN16-AS1 |
| chr11 | 768861    | 768861    | -9.1631E-02 | 3.50E-03 | 4.92E-02 | GATD1       |
| chr11 | 124749818 | 124749818 | 1.3694E+00  | 3.51E-03 | 4.92E-02 | ROBO3       |
| chr1  | 3697420   | 3697420   | 8.7170E-01  | 3.53E-03 | 4.95E-02 | LRRC47      |
| chrX  | 46741061  | 46741061  | 1.3296E+00  | 3.54E-03 | 4.95E-02 | RP2         |
| chr14 | 93649251  | 93649251  | 7.4332E-01  | 3.54E-03 | 4.95E-02 | MOAP1       |
| chr22 | 30093679  | 30093679  | 5.3183E-01  | 3.55E-03 | 4.96E-02 | NF2         |
| chr6  | 28090895  | 28090895  | 1.6951E+00  | 3.55E-03 | 4.96E-02 | ZSCAN16-AS1 |

## KEGG\_hyper

| Category     | Term                                               | PValue      | Genes                                                               | Fold Enrichment |
|--------------|----------------------------------------------------|-------------|---------------------------------------------------------------------|-----------------|
| KEGG_PATHWAY | hsa04110:Cell cycle                                | 0.001428995 | 4998, 7040, 51343, 990, 7027, 7709, 1028, 7029, 6502, 1870          | 3.690450758     |
| KEGG_PATHWAY | hsa05169:Epstein-Barr virus infection              | 0.008152694 | 6693, 5293, 548644, 5335, 5757, 5709, 6908, 5433, 6502, 208, 246721 | 2.649355176     |
| KEGG_PATHWAY | hsa04140:Regulation of autophagy                   | 0.009727205 | 89849, 9776, 55054, 11345, 11337                                    | 5.866870436     |
| KEGG_PATHWAY | hsa05211:Renal cell carcinoma                      | 0.013099377 | 1398, 7040, 5293, 2885, 7428, 208                                   | 4.224146714     |
| KEGG_PATHWAY | hsa01130:Biosynthesis of antibiotics               | 0.016715894 | 2224, 6307, 6888, 10380, 2222, 5230, 2597, 5723, 5198, 91373, 2821  | 2.374422092     |
| KEGG_PATHWAY | hsa00564:Glycerophospholipid metabolism            | 0.01689451  | 154141, 10162, 8525, 81490, 54675, 9926, 79143                      | 3.371906588     |
| KEGG_PATHWAY | hsa05220:Chronic myeloid leukemia                  | 0.019679986 | 1398, 7040, 5293, 2885, 208, 1870                                   | 3.813465784     |
| KEGG_PATHWAY | hsa05142:Chagas disease (American trypanosomiasis) | 0.025202388 | 7040, 841, 5293, 2778, 2773, 51135, 208                             | 3.080106979     |
| KEGG_PATHWAY | hsa00240:Pyrimidine metabolism                     | 0.025202388 | 548644, 54107, 5558, 6241, 5433, 9583, 246721                       | 3.080106979     |
| KEGG_PATHWAY | hsa01100:Metabolic pathways                        | 0.031457004 | 10998, 5230, 54107, 5558, 6241, 2224, 6888, 93100, 2222, 10380,     | 1.378810104     |

|              |                                                      |             |                                                                                                                                                                                 |             |
|--------------|------------------------------------------------------|-------------|---------------------------------------------------------------------------------------------------------------------------------------------------------------------------------|-------------|
|              |                                                      |             | 7358, 2597, 8525, 125061, 5287, 84245, 246721, 3712, 8854, 154141, 10020, 5723, 9563, 5198, 81490, 91373, 23545, 6307, 548644, 5335, 133686, 51, 5433, 54675, 4669, 2821, 54802 |             |
| KEGG_PATHWAY | hsa05223:Non-small cell lung cancer                  | 0.032775214 | 5293, 5335, 2885, 208, 1870                                                                                                                                                     | 4.085856197 |
| KEGG_PATHWAY | hsa00230:Purine metabolism                           | 0.037307842 | 548644, 5158, 54107, 5558, 6241, 5198, 5433, 9583, 246721                                                                                                                       | 2.340081276 |
| KEGG_PATHWAY | hsa04722:Neurotrophin signaling pathway              | 0.045938982 | 1398, 5293, 5335, 2885, 397, 51135, 208                                                                                                                                         | 2.669426049 |
| KEGG_PATHWAY | hsa05214:Glioma                                      | 0.052126186 | 5293, 5335, 2885, 208, 1870                                                                                                                                                     | 3.520122262 |
| KEGG_PATHWAY | hsa04962:Vasopressin-regulated water reabsorption    | 0.069617083 | 5869, 397, 2778, 10540                                                                                                                                                          | 4.160144491 |
| KEGG_PATHWAY | hsa04068:FoxO signaling pathway                      | 0.070898869 | 7040, 5293, 2885, 11345, 11337, 6502, 208                                                                                                                                       | 2.39053079  |
| KEGG_PATHWAY | hsa03022:Basal transcription factors                 | 0.073450683 | 6908, 6882, 129685, 2967                                                                                                                                                        | 4.067696836 |
| KEGG_PATHWAY | hsa05200:Pathways in cancer                          | 0.084293638 | 1398, 841, 7040, 5293, 5335, 2885, 8031, 26060, 7428, 2778, 2773, 6502, 208, 1870                                                                                               | 1.630183846 |
| KEGG_PATHWAY | hsa00520:Amino sugar and nucleotide sugar metabolism | 0.08549845  | 7358, 10020, 91373, 2821                                                                                                                                                        | 3.813465784 |
| KEGG_PATHWAY | hsa01200:Carbon metabolism                           | 0.098740379 | 6888, 5230, 2597, 5723, 9563, 2821                                                                                                                                              | 2.429818906 |

## KEGG\_hypo

| Category     | Term                                                 | PValue      | Genes                                 | Fold Enrichment |
|--------------|------------------------------------------------------|-------------|---------------------------------------|-----------------|
| KEGG_PATHWAY | hsa00520:Amino sugar and nucleotide sugar metabolism | 0.062948868 | 64841, 10020, 3074                    | 7.1979          |
| KEGG_PATHWAY | hsa04144:Endocytosis                                 | 0.068255788 | 7040, 116988, 30011, 156, 29924, 9146 | 2.6783          |
| KEGG_PATHWAY | hsa05145:Toxoplasmosis                               | 0.079297473 | 7040, 331, 51135, 4793                | 3.9040          |

## BP\_hyper

| Category         | Term                         | PValue   | Genes                                                                                                   | Fold Enrichment |
|------------------|------------------------------|----------|---------------------------------------------------------------------------------------------------------|-----------------|
| GOTERM_BP_DIRECT | GO:0015031~protein transport | 4.18E-05 | 53916, 26515, 91056, 55054, 326624, 9545, 9907, 23011, 57132, 9094, 222068, 5481, 89849, 55327, 348995, | 2.8086          |

|                  |                                                                    |          |                                                                                                      |         |
|------------------|--------------------------------------------------------------------|----------|------------------------------------------------------------------------------------------------------|---------|
|                  |                                                                    |          | 8724, 11345, 5869, 285521, 85406, 11337, 6102                                                        |         |
| GOTERM_BP_DIRECT | GO:0006260~DNA replication                                         | 6.07E-05 | 10524, 84289, 84296, 672, 54107, 6241, 3364, 4998, 55388, 54921, 990, 83695, 5763                    | 4.2293  |
| GOTERM_BP_DIRECT | GO:0007067~mitotic nuclear division                                | 4.37E-04 | 55920, 348235, 899, 51343, 9113, 348995, 55839, 990, 10776, 5536, 151648, 54461, 23137, 10540, 79003 | 3.0500  |
| GOTERM_BP_DIRECT | GO:0008654~phospholipid biosynthetic process                       | 1.09E-03 | 154141, 10162, 81490, 54675, 9926, 79143                                                             | 7.5640  |
| GOTERM_BP_DIRECT | GO:0000724~double-strand break repair via homologous recombination | 3.42E-03 | 7517, 119392, 672, 7516, 9907, 3364, 23137                                                           | 4.7701  |
| GOTERM_BP_DIRECT | GO:0006270~DNA replication initiation                              | 3.49E-03 | 4998, 55388, 84296, 990, 5558                                                                        | 7.8791  |
| GOTERM_BP_DIRECT | GO:0000082~G1/S transition of mitotic cell cycle                   | 4.12E-03 | 4998, 51379, 55388, 9113, 990, 5558, 6241, 6502                                                      | 3.9550  |
| GOTERM_BP_DIRECT | GO:0008156~negative regulation of DNA replication                  | 5.87E-03 | 7040, 990, 4771, 3364                                                                                | 10.6161 |
| GOTERM_BP_DIRECT | GO:0001933~negative regulation of protein phosphorylation          | 7.06E-03 | 80279, 7040, 2280, 84919, 5536, 11261                                                                | 4.9600  |
| GOTERM_BP_DIRECT | GO:0000045~autophagosome assembly                                  | 8.54E-03 | 81631, 89849, 9776, 55054, 11345                                                                     | 6.1496  |
| GOTERM_BP_DIRECT | GO:0000278~mitotic cell cycle                                      | 8.54E-03 | 55270, 146909, 7027, 7516, 7029                                                                      | 6.1496  |
| GOTERM_BP_DIRECT | GO:0007059~chromosome segregation                                  | 1.11E-02 | 348235, 9391, 672, 55839, 151648, 79003                                                              | 4.4494  |
| GOTERM_BP_DIRECT | GO:1901796~regulation of signal transduction by p53 class mediator | 1.17E-02 | 10524, 84289, 672, 6908, 6882, 83695, 3364, 79813                                                    | 3.2533  |
| GOTERM_BP_DIRECT | GO:0042795~snRNA transcription from RNA polymerase II promoter     | 1.24E-02 | 6619, 57508, 6908, 6882, 5433, 129685                                                                | 4.3223  |
| GOTERM_BP_DIRECT | GO:0002098~tRNA wobble uridine modification                        | 1.28E-02 | 27304, 84705, 55140                                                                                  | 16.8088 |
| GOTERM_BP_DIRECT | GO:0070475~rRNA base methylation                                   | 1.28E-02 | 91893, 155400, 260294                                                                                | 16.8088 |
| GOTERM_BP_DIRECT | GO:0071260~cellular response to mechanical stimulus                | 1.32E-02 | 7040, 841, 22927, 8795, 1265, 835                                                                    | 4.2614  |
| GOTERM_BP_DIRECT | GO:0000732~strand displacement                                     | 1.42E-02 | 7517, 10524, 672, 7516                                                                               | 7.7579  |
| GOTERM_BP_DIRECT | GO:0050765~negative regulation of phagocytosis                     | 1.58E-02 | 7040, 8724, 1265                                                                                     | 15.1279 |
| GOTERM_BP_DIRECT | GO:0010212~response to ionizing radiation                          | 1.58E-02 | 7517, 10524, 672, 7516, 84446                                                                        | 5.1456  |
| GOTERM_BP_DIRECT | GO:0043065~positive regulation of apoptotic process                | 1.63E-02 | 8854, 84289, 7040, 5481, 64112, 9113, 9148, 23385, 51118, 64857, 90427, 10687, 835                   | 2.1851  |
| GOTERM_BP_DIRECT | GO:0007062~sister chromatid cohesion                               | 1.65E-02 | 55920, 348235, 348995, 55839, 151648, 79003, 23137                                                   | 3.4270  |

|                  |                                                                                                                            |          |                                                                                                |         |
|------------------|----------------------------------------------------------------------------------------------------------------------------|----------|------------------------------------------------------------------------------------------------|---------|
| GOTERM_BP_DIRECT | GO:0016236~macroautophagy                                                                                                  | 1.73E-02 | 81631, 9776, 55054, 11345, 10670, 11337                                                        | 3.9810  |
| GOTERM_BP_DIRECT | GO:0051301~cell division                                                                                                   | 2.25E-02 | 55920, 146909, 2773, 151648, 57132, 348235, 899, 51343, 348995, 9113, 990, 10776, 79003, 23137 | 2.0171  |
| GOTERM_BP_DIRECT | GO:0061014~positive regulation of mRNA catabolic process                                                                   | 2.26E-02 | 10236, 56829, 9567                                                                             | 12.6066 |
| GOTERM_BP_DIRECT | GO:0001833~inner cell mass cell proliferation                                                                              | 2.26E-02 | 84296, 9837, 129685                                                                            | 12.6066 |
| GOTERM_BP_DIRECT | GO:0071479~cellular response to ionizing radiation                                                                         | 2.29E-02 | 7040, 2885, 83695, 3364                                                                        | 6.5066  |
| GOTERM_BP_DIRECT | GO:0032781~positive regulation of ATPase activity                                                                          | 2.29E-02 | 11345, 3337, 163590, 130872                                                                    | 6.5066  |
| GOTERM_BP_DIRECT | GO:0006312~mitotic recombination                                                                                           | 2.63E-02 | 2067, 7516, 7155                                                                               | 11.6369 |
| GOTERM_BP_DIRECT | GO:0070306~lens fiber cell differentiation                                                                                 | 2.63E-02 | 7040, 51343, 4771                                                                              | 11.6369 |
| GOTERM_BP_DIRECT | GO:0006364~rRNA processing                                                                                                 | 2.69E-02 | 6228, 5822, 79707, 6143, 51077, 3921, 118460, 51118, 54853, 6187                               | 2.3564  |
| GOTERM_BP_DIRECT | GO:0000038~very long-chain fatty acid metabolic process                                                                    | 3.03E-02 | 10998, 51, 5828                                                                                | 10.8057 |
| GOTERM_BP_DIRECT | GO:0000731~DNA synthesis involved in DNA repair                                                                            | 3.14E-02 | 7517, 10524, 672, 7516                                                                         | 5.7630  |
| GOTERM_BP_DIRECT | GO:0006271~DNA strand elongation involved in DNA replication                                                               | 3.45E-02 | 84296, 9837, 5558                                                                              | 10.0853 |
| GOTERM_BP_DIRECT | GO:0008033~tRNA processing                                                                                                 | 3.63E-02 | 54517, 6301, 91893, 54802                                                                      | 5.4515  |
| GOTERM_BP_DIRECT | GO:0006978~DNA damage response, signal transduction by p53 class mediator resulting in transcription of p21 class mediator | 3.90E-02 | 10524, 672, 4582                                                                               | 9.4550  |
| GOTERM_BP_DIRECT | GO:0039689~negative stranded viral RNA replication                                                                         | 3.92E-02 | 89849, 55054                                                                                   | 50.4264 |
| GOTERM_BP_DIRECT | GO:0010824~regulation of centrosome duplication                                                                            | 5.34E-02 | 7517, 57132, 54461                                                                             | 7.9621  |
| GOTERM_BP_DIRECT | GO:0006413~translational initiation                                                                                        | 5.48E-02 | 123263, 6228, 8668, 6143, 1968, 3921, 6187                                                     | 2.5765  |
| GOTERM_BP_DIRECT | GO:0006094~gluconeogenesis                                                                                                 | 5.60E-02 | 5230, 2597, 1407, 2821                                                                         | 4.5842  |
| GOTERM_BP_DIRECT | GO:0000819~sister chromatid segregation                                                                                    | 5.82E-02 | 9113, 7155                                                                                     | 33.6176 |
| GOTERM_BP_DIRECT | GO:0031572~G2 DNA damage checkpoint                                                                                        | 5.86E-02 | 51343, 672, 84446                                                                              | 7.5640  |
| GOTERM_BP_DIRECT | GO:0006283~transcription-coupled nucleotide-excision repair                                                                | 5.88E-02 | 57461, 2067, 57654, 5433, 2967                                                                 | 3.4072  |
| GOTERM_BP_DIRECT | GO:0006412~translation                                                                                                     | 6.52E-02 | 6228, 399512, 81034, 6301, 6143, 64960, 81894, 3921, 2967, 6187                                | 1.9931  |
| GOTERM_BP_DIRECT | GO:0035264~multicellular organism growth                                                                                   | 7.39E-02 | 2067, 7516, 59338, 1028, 2778                                                                  | 3.1517  |
| GOTERM_BP_DIRECT | GO:0001731~formation of translation preinitiation                                                                          | 7.51E-02 | 8668, 8562, 1968                                                                               | 6.5774  |

|                  |                                                                                          |          |                                                              |         |
|------------------|------------------------------------------------------------------------------------------|----------|--------------------------------------------------------------|---------|
|                  | complex                                                                                  |          |                                                              |         |
| GOTERM_BP_DIRECT | GO:0000083~regulation of transcription involved in G1/S transition of mitotic cell cycle | 7.51E-02 | 4998, 990, 6241                                              | 6.5774  |
| GOTERM_BP_DIRECT | GO:0010716~negative regulation of extracellular matrix disassembly                       | 7.68E-02 | 7040, 1471                                                   | 25.2132 |
| GOTERM_BP_DIRECT | GO:0071514~genetic imprinting                                                            | 7.68E-02 | 1028, 2778                                                   | 25.2132 |
| GOTERM_BP_DIRECT | GO:0051280~negative regulation of release of sequestered calcium ion into cytosol        | 7.68E-02 | 7040, 2280                                                   | 25.2132 |
| GOTERM_BP_DIRECT | GO:0000707~meiotic DNA recombinase assembly                                              | 7.68E-02 | 7517, 7516                                                   | 25.2132 |
| GOTERM_BP_DIRECT | GO:0051984~positive regulation of chromosome segregation                                 | 7.68E-02 | 990, 23137                                                   | 25.2132 |
| GOTERM_BP_DIRECT | GO:0031146~SCF-dependent proteasomal ubiquitin-dependent protein catabolic process       | 8.09E-02 | 899, 9616, 54461                                             | 6.3033  |
| GOTERM_BP_DIRECT | GO:0006887~exocytosis                                                                    | 8.21E-02 | 3996, 55327, 84958, 9545, 51248                              | 3.0377  |
| GOTERM_BP_DIRECT | GO:0071158~positive regulation of cell cycle arrest                                      | 8.68E-02 | 7040, 51379, 672                                             | 6.0512  |
| GOTERM_BP_DIRECT | GO:0098609~cell-cell adhesion                                                            | 9.02E-02 | 57142, 392, 1968, 5093, 56829, 3337, 64837, 8496, 6187, 1265 | 1.8608  |
| GOTERM_BP_DIRECT | GO:0006368~transcription elongation from RNA polymerase II promoter                      | 9.08E-02 | 6908, 6882, 5433, 55140, 2967                                | 2.9318  |
| GOTERM_BP_DIRECT | GO:0061621~canonical glycolysis                                                          | 9.29E-02 | 5230, 2597, 2821                                             | 5.8184  |
| GOTERM_BP_DIRECT | GO:0017157~regulation of exocytosis                                                      | 9.29E-02 | 3996, 9545, 23011                                            | 5.8184  |
| GOTERM_BP_DIRECT | GO:0006432~phenylalanyl-tRNA aminoacylation                                              | 9.50E-02 | 57470, 91893                                                 | 20.1706 |
| GOTERM_BP_DIRECT | GO:1903361~protein localization to basolateral plasma membrane                           | 9.50E-02 | 55327, 51248                                                 | 20.1706 |
| GOTERM_BP_DIRECT | GO:0002192~IRES-dependent translational initiation                                       | 9.50E-02 | 8562, 5936                                                   | 20.1706 |
| GOTERM_BP_DIRECT | GO:0071569~protein ufmylation                                                            | 9.50E-02 | 80279, 51569                                                 | 20.1706 |
| GOTERM_BP_DIRECT | GO:0090656~t-circle formation                                                            | 9.50E-02 | 7517, 2067                                                   | 20.1706 |
| GOTERM_BP_DIRECT | GO:1903874~ferrous iron transmembrane transport                                          | 9.50E-02 | 4891, 81894                                                  | 20.1706 |
| GOTERM_BP_DIRECT | GO:0006281~DNA repair                                                                    | 9.55E-02 | 7517, 2067, 51343, 672, 7516, 2177, 5536, 3364, 2967         | 1.9312  |

## BP\_hypo

| Category         | Term                                                                                         | PValue   | Genes                                   | Fold Enrichment |
|------------------|----------------------------------------------------------------------------------------------|----------|-----------------------------------------|-----------------|
| GOTERM_BP_DIRECT | GO:0042059~negative regulation of epidermal growth factor receptor signaling pathway         | 3.25E-03 | 55658, 30011, 29924, 9146               | 13.3270         |
| GOTERM_BP_DIRECT | GO:0070936~protein K48-linked ubiquitination                                                 | 6.90E-03 | 54926, 55658, 7326, 84937               | 10.2079         |
| GOTERM_BP_DIRECT | GO:0016477~cell migration                                                                    | 1.42E-02 | 10152, 7040, 399687, 146206, 30011, 983 | 4.1841          |
| GOTERM_BP_DIRECT | GO:0030511~positive regulation of transforming growth factor beta receptor signaling pathway | 1.67E-02 | 201163, 4221, 3622                      | 14.9929         |
| GOTERM_BP_DIRECT | GO:0018105~peptidyl-serine phosphorylation                                                   | 2.02E-02 | 1455, 5566, 5585, 156, 983              | 4.7977          |
| GOTERM_BP_DIRECT | GO:0000077~DNA damage checkpoint                                                             | 2.54E-02 | 1869, 3014, 8682                        | 11.9943         |
| GOTERM_BP_DIRECT | GO:0043161~proteasome-mediated ubiquitin-dependent protein catabolic process                 | 2.69E-02 | 54926, 55658, 84937, 153830, 81858, 983 | 3.5451          |
| GOTERM_BP_DIRECT | GO:0006363~termination of RNA polymerase I transcription                                     | 2.70E-02 | 5434, 7270, 2967                        | 11.6074         |
| GOTERM_BP_DIRECT | GO:0006361~transcription initiation from RNA polymerase I promoter                           | 3.04E-02 | 5434, 7270, 2967                        | 10.9039         |
| GOTERM_BP_DIRECT | GO:0006383~transcription from RNA polymerase III promoter                                    | 3.04E-02 | 27297, 5434, 6621                       | 10.9039         |
| GOTERM_BP_DIRECT | GO:0018107~peptidyl-threonine phosphorylation                                                | 3.94E-02 | 5566, 156, 983                          | 9.4692          |
| GOTERM_BP_DIRECT | GO:0045599~negative regulation of fat cell differentiation                                   | 4.72E-02 | 7040, 1869, 161882                      | 8.5673          |
| GOTERM_BP_DIRECT | GO:0045591~positive regulation of regulatory T cell differentiation                          | 4.87E-02 | 7040, 146206                            | 39.9810         |
| GOTERM_BP_DIRECT | GO:0006412~translation                                                                       | 5.94E-02 | 1468, 79751, 64146, 65003, 6139, 2967   | 2.8445          |
| GOTERM_BP_DIRECT | GO:0010628~positive regulation of gene expression                                            | 6.68E-02 | 8880, 7040, 1869, 9146, 983, 1265       | 2.7468          |
| GOTERM_BP_DIRECT | GO:0042127~regulation of cell proliferation                                                  | 6.78E-02 | 55658, 331, 8764, 3727, 1265            | 3.2417          |
| GOTERM_BP_DIRECT | GO:0050765~negative regulation of phagocytosis                                               | 7.98E-02 | 7040, 1265                              | 23.9886         |
| GOTERM_BP_DIRECT | GO:0008535~respiratory chain complex IV assembly                                             | 7.98E-02 | 1353, 285521                            | 23.9886         |
| GOTERM_BP_DIRECT | GO:0030097~hemopoiesis                                                                       | 8.58E-02 | 861, 201163, 1265                       | 6.0988          |
| GOTERM_BP_DIRECT | GO:0031065~positive regulation of histone deacetylation                                      | 8.74E-02 | 7040, 3622                              | 21.8078         |
| GOTERM_BP_DIRECT | GO:0030851~granulocyte differentiation                                                       | 8.74E-02 | 863, 161882                             | 21.8078         |
| GOTERM_BP_DIRECT | GO:0050727~regulation of inflammatory response                                               | 9.59E-02 | 22904, 7791, 331                        | 5.7116          |

|                  |                              |          |                                                       |        |
|------------------|------------------------------|----------|-------------------------------------------------------|--------|
| GOTERM_BP_DIRECT | GO:0006915~apoptotic process | 9.89E-02 | 9220, 7818, 84971, 9262, 331, 90525, 30011, 983, 8682 | 1.9039 |
| GOTERM_BP_DIRECT | GO:0006914~autophagy         | 9.92E-02 | 410, 84971, 79142, 9146                               | 3.6073 |
